# Supplementary material for: High acidity cellulose sulfuric acid from sulfur trioxide: a highly efficient catalyst for the one step synthesis of xanthene and dihydroquinazolinone derivatives
Source: PubMed Central journal article supplement — RSC Adv. 2019 Sep 12;9(49):28718–23. doi: 10.1039/c9ra05748j (PMC9071201; doi:10.1039/c9ra05748j), 2019-09-12

# **High acidity cellulose sulfuric acid from sulfur trioxide: An highly efficient catalyst for the one step synthesis of xanthene and dihydroquinazolinone derivatives**

Xiaofei Yue,<sup>a†</sup> Zhiqiang Wu,<sup>a†</sup> Gang Wang,<sup>a</sup> Yanping Liang,<sup>a</sup> Yanyan Sun,<sup>a</sup>  
Manrong Song,<sup>a</sup> Haijuan Zhan,<sup>a</sup> Shuxian Bi,<sup>a</sup> Wanyi Liu <sup>\*a</sup>

*<sup>a</sup> State Key Laboratory of High-efficiency Utilization of Coal and Green Chemical Engineering, National Demonstration Center for Experimental Chemistry Education, College of Chemistry and Chemical Engineering, Ningxia University, Yinchuan 750021, P. R. China.*

E-mail: liuwy@nxu.edu.cn

## General Information

$^1\text{H}$  NMR and  $^{13}\text{C}$  NMR spectra were recorded on Bruker 400 ( $^1\text{H}$ , 400 MHz;  $^{13}\text{C}$ , 100 MHz) instrument internally referenced to tetramethylsilane (TMS) or  $\text{CDCl}_3$  signals. The NMR data were collected at ambient temperature and Chemical shifts are reported in parts per million (ppm) relative to the NMR solvent peaks. Data for  $^1\text{H}$ -NMR are reported as follows: chemical shift, multiplicity, coupling constants, and integration. Processing of the NMR data was done using the standard Mestrenova 9.0.1 software.

The powder X-ray diffraction (XRD) patterns were recorded by a Rigaku D/max-2500 X-ray diffractometer using Cu-K $\alpha$  radiation. The fourier transform infrared (FTIR) spectra were recorded in the range of 400-4000  $\text{cm}^{-1}$  using a FOSS Fibertec 8000 FT-IR spectrometer employing potassium bromide pellets technique at room temperature. The scanning electron microscopy (SEM) images were obtained on a FEI Verous 460 scanning electron microscope. The transmission electron microscope (TEM) images were obtained on a TecnaiG2 F20 S-TWIN scanning electron microscope. The morphology of the materials was obtained on JEOL JEM-2010F High Resolution Transmission Electron Microscope (HRTEM). Thermal gravimetric (TG) analysis was conducted on a TG-DSC instrument (Pyris 103030247) under a  $\text{N}_2$  atmosphere at a heating rate of 10  $^\circ\text{C}/\text{min}$  from 25 to 700 $^\circ\text{C}$ . The elemental analysis was conducted on a Vario EL cube 0303040206 elemental analyzer.

Materials: All reagents were used as received from commercial sources and all of the analytically pure. The benzaldehyde was re-distilled and purified. The  $\text{SO}_3$  is made in the laboratory.

## The effect of sulfonation time on cellulose.

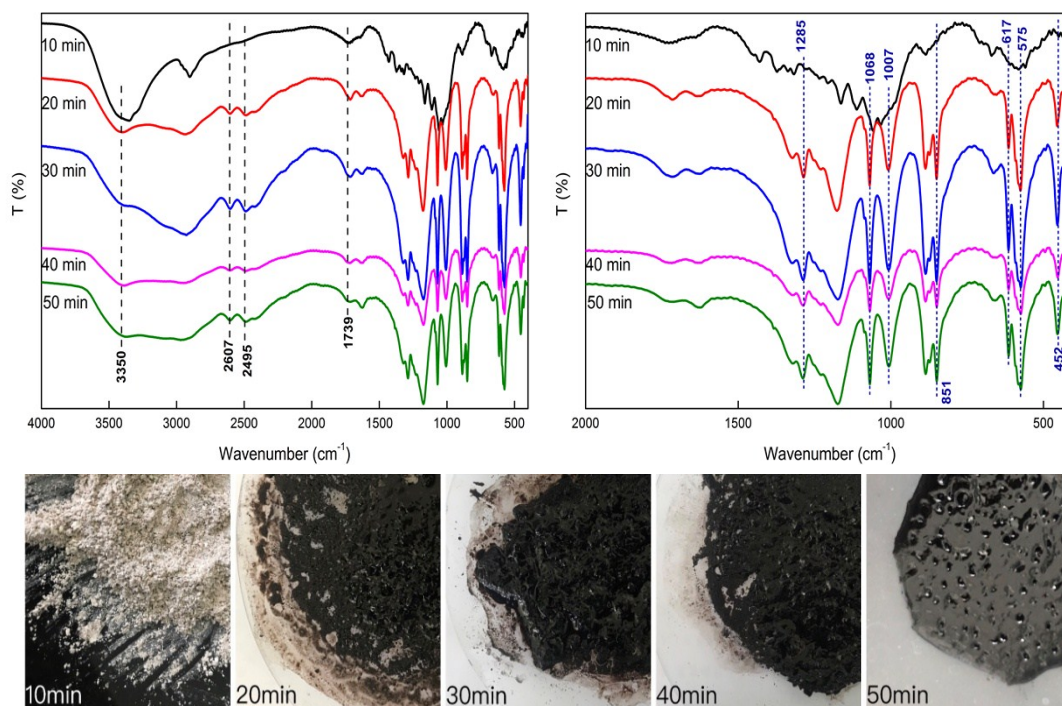

Fig. S1 The IR analysis of the effect of different sulfonation time on cellulose.

By comparing the infrared spectra of CSA in different sulfonation time, we found that OH absorption peak at  $3350\text{ cm}^{-1}$  becomes smooth gradually when the sulfonation time more than 20 min; and the peaks corresponding to the O=S=O asymmetric and symmetric stretching vibrations and S-O stretching vibration of the sulfonic acid groups became more incisive and obvious, it was indicated that not only more -O-H groups been substituted by  $-\text{SO}_3\text{H}$  groups, but deeper depolymerization of cellulose with increasing time. In addition, the the new peak at  $2600\text{ cm}^{-1}$  appeared in infrared spectra of more than 20 min sulfonation time presumed to be the -S-H.

In summary, longer sulfonation time, means deeper degree of depolymerization of cellulose glucose unit, more complex sulfonated product because formed sulfhydryl groups, and deeper carbonization phenomenon (Fig.S1). Therefore we chosen 10 min as the optimal sulfonation time.

### Optimization of conditions for catalytic synthesis of xanthene compounds.

**Table S1** Optimization of reaction condition between 2-naphthol (1.0 mmol) and benzaldehyde (1.0 mmol) in the presence of HS-cellulose sulphate.

| Entry <sup>a</sup> | Catalyst/mg | Temperature/°C | Solvent             | Yield <sup>b</sup> /% |
|--------------------|-------------|----------------|---------------------|-----------------------|
| 1                  | 10          | 120            | Solvent-free        | 90                    |
| 2                  | 6           | 120            | Solvent-free        | 90                    |
| 3                  | 3           | 120            | Solvent-free        | 88                    |
| <b>4</b>           | <b>10</b>   | <b>110</b>     | <b>Solvent-free</b> | <b>97</b>             |
| 5                  | 6           | 110            | Solvent-free        | 93                    |
| 6                  | 3           | 110            | Solvent-free        | 89                    |
| 7                  | 10          | 100            | Solvent-free        | 92                    |
| 8                  | 6           | 100            | Solvent-free        | 91                    |
| 9                  | 3           | 100            | Solvent-free        | 86                    |
| 10                 | 10          | 90             | Solvent-free        | 83                    |
| 11                 | 6           | 90             | Solvent-free        | 81                    |
| 12                 | 10          | Reflux         | Water(2ml)          | 21                    |
| 13                 | 10          | Reflux         | Ethyl etate (2ml)   | 51                    |
| 14                 | 10          | Reflux         | DCE(2ml)            | 52                    |
| 15                 | 10          | Reflux         | Ethanol(2ml)        | 56                    |

<sup>a</sup>Reaction conditions: 2-naphthol (1.0 mmol); benzaldehyde (1.0 mmol). DCE: Dichloroethane.

<sup>b</sup>Isolated yield.

## Elemental analysis and IR testing of CSA

Table S2 Element analysis of CSA catalyst before use and after three uses.

| Relative mass of elements | C/%   | H/%  | N/%  | S/%  |
|---------------------------|-------|------|------|------|
| CSA                       | 35.52 | 6.53 | 1.67 | 4.65 |
| CSA (3 cycles)            | 40.31 | 6.29 | 1.03 | 1.64 |

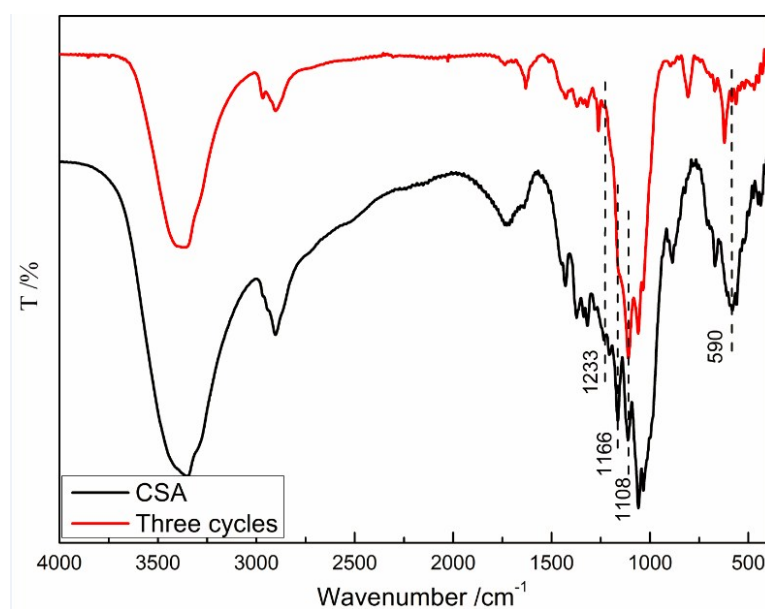

Fig. S2 The IR analysis of HS-cellulose sulfonate catalyst after three uses.

### Compound data of dihydroquinazolinone(3a-3r).

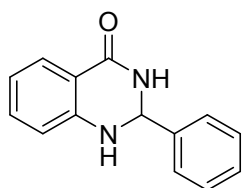

**2-phenyl-2,3-dihydroquinazolin-4(1H)-one (3a):** White powder, 94%.  $^1\text{H}$  NMR (400 MHz,  $\text{DMSO-}d_6$ )  $\delta$  8.30 (t,  $J = 2.0$  Hz, 1H), 7.61 (dd,  $J = 7.8, 1.6$  Hz, 1H), 7.50 (d,  $J = 1.8$  Hz, 1H), 7.49 (t,  $J = 1.5$  Hz, 1H), 7.42 – 7.37 (m, 2H), 7.37 – 7.32 (m, 1H), 7.24 (ddd,  $J = 8.1, 7.2, 1.6$  Hz, 1H), 7.12 (d,  $J = 1.8$  Hz, 1H), 6.75 (dd,  $J = 8.2, 1.0$  Hz, 1H), 6.67 (ddd,  $J = 8.0, 7.2, 1.1$  Hz, 1H), 5.75 (t,  $J = 1.8$  Hz, 1H);  $^{13}\text{C}$  NMR (101 MHz,  $\text{DMSO}$ )  $\delta$  163.60, 147.88, 141.61, 133.32, 128.47, 128.33, 127.35, 126.88, 117.11, 114.94, 114.40, 66.55.

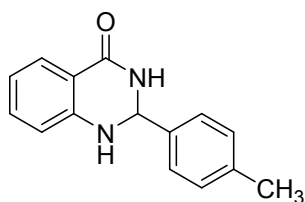

**2-(p-tolyl)-2,3-dihydroquinazolin-4(1H)-one (3b):** White powder, 87%.  $^1\text{H}$  NMR (400 MHz,  $\text{DMSO-}d_6$ )  $\delta$  8.24 (t,  $J = 1.9$  Hz, 1H), 7.61 (dd,  $J = 7.8, 1.6$  Hz, 1H), 7.37 (d,  $J = 7.9$  Hz, 2H), 7.23 (ddd,  $J = 8.5, 7.2, 1.7$  Hz, 1H), 7.19 (d,  $J = 7.9$  Hz, 2H), 7.06 (s, 1H), 6.77 – 6.72 (m, 1H), 6.70 – 6.64 (m, 1H), 5.71 (t,  $J = 1.7$  Hz, 1H), 2.29 (s, 3H);  $^{13}\text{C}$  NMR (101 MHz,  $\text{DMSO}$ )  $\delta$  163.64, 147.91, 138.64, 137.71, 133.25, 128.80, 127.33, 126.80, 117.05, 114.99, 114.39, 66.37, 20.73.

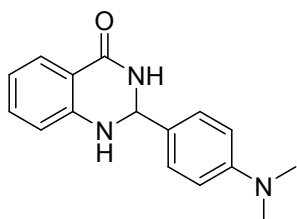

**2-(4-(dimethylamino)phenyl)-2,3-dihydroquinazolin-4(1H)-one (3c):** Light yellow powder, 98%.  $^1\text{H}$  NMR (400 MHz,  $\text{DMSO-}d_6$ )  $\delta$  8.09 (t,  $J = 1.7$  Hz, 1H), 7.61 (dd,  $J = 7.7, 1.6$  Hz, 1H), 7.33 – 7.28 (m, 2H), 7.23 (ddd,  $J = 8.1, 7.2, 1.7$  Hz, 1H), 6.93 (s, 1H), 6.75 – 6.70 (m, 3H), 6.66 (ddd,  $J = 8.0, 7.2, 1.1$  Hz, 1H), 5.63 (t,  $J = 1.4$  Hz, 1H), 2.88 (s, 6H);  $^{13}\text{C}$  NMR (101 MHz,  $\text{DMSO}$ )  $\delta$  163.83, 150.70, 148.22, 133.14, 128.62, 127.72, 127.33, 116.94, 115.04, 114.38, 111.93, 66.64.

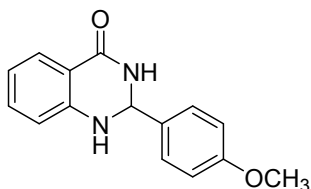

**2-(4-methoxyphenyl)-2,3-dihydroquinazolin-4(1H)-one (3d):** White powder, 86%.  $^1\text{H}$  NMR (400 MHz,  $\text{DMSO-}d_6$ )  $\delta$  8.20 (d,  $J = 2.0$  Hz, 1H), 7.61 (dd,  $J = 7.8, 1.6$  Hz, 1H), 7.43 (d,  $J = 2.1$  Hz, 1H), 7.41 (d,  $J = 2.1$  Hz, 1H), 7.24 (ddd,  $J = 8.6, 7.3, 1.6$  Hz, 1H), 7.02 (s, 1H), 6.95 (d,  $J = 2.1$  Hz, 1H), 6.94 (d,  $J = 2.1$  Hz, 1H), 6.74 (dd,  $J = 8.2, 1.0$  Hz, 1H), 6.67 (td,  $J = 7.5, 1.0$  Hz, 1H), 5.71 (t,  $J = 1.6$  Hz, 1H), 3.74 (s, 3H);  $^{13}\text{C}$  NMR (101 MHz,  $\text{DMSO}$ )  $\delta$  163.69, 159.41, 148.01, 133.44, 133.23, 128.21,

127.34, 117.07, 114.99, 114.40, 113.62, 66.31, 55.18.

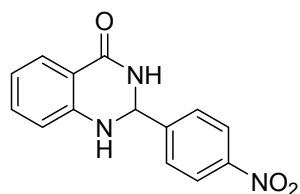

**2-(4-nitrophenyl)-2,3-dihydroquinazolin-4(1H)-one (3e):** White powder, 87%. <sup>1</sup>H NMR (400 MHz, DMSO-*d*<sub>6</sub>) δ 8.54 (dd, *J* = 3.0, 1.5 Hz, 1H), 8.26 (d, *J* = 2.0 Hz, 1H), 8.25 (d, *J* = 2.0 Hz, 1H), 7.75 (d, *J* = 2.0 Hz, 1H), 7.73 (d, *J* = 2.0 Hz, 1H), 7.61 (dd, *J* = 7.7, 1.6 Hz, 1H), 7.34 (d, *J* = 1.9 Hz, 1H), 7.26 (ddd, *J* = 8.6, 7.2, 1.7 Hz, 1H), 6.77 (dd, *J* = 8.2, 1.0 Hz, 1H), 6.69 (td, *J* = 7.5, 1.1 Hz, 1H), 5.92 (t, *J* = 2.5 Hz, 1H); <sup>13</sup>C NMR (101 MHz, DMSO) δ 163.27, 149.32, 147.40, 147.23, 133.56, 128.03, 127.40, 123.59, 117.46, 114.89, 114.54, 65.27.

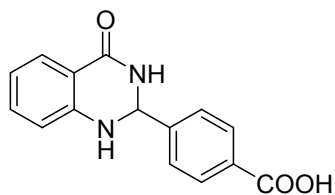

**4-(4-oxo-1,2,3,4-tetrahydroquinazolin-2-yl)benzoic acid (3f):** Light yellow powder, 91%. <sup>1</sup>H NMR (400 MHz, DMSO-*d*<sub>6</sub>) δ 13.29 (s, 1H), 8.68 (s, 1H), 8.11 (s, 1H), 8.10 – 8.04 (m, 4H), 7.88 (d, *J* = 7.7 Hz, 1H), 7.63 (s, 1H), 7.58 – 7.51 (m, 1H), 7.36 (t, *J* = 7.5 Hz, 1H), 7.25 (d, *J* = 7.9 Hz, 1H); <sup>13</sup>C NMR (101 MHz, DMSO) δ 167.43, 166.86, 161.52, 149.08, 139.08, 133.61, 131.82, 129.83, 129.68, 129.06, 128.55, 126.29, 119.35.

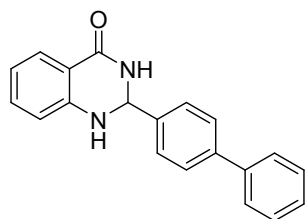

**2-([1,1'-biphenyl]-4-yl)-2,3-dihydroquinazolin-4(1H)-one (3g):** Light yellow powder, 80%. <sup>1</sup>H NMR (400 MHz, DMSO-*d*<sub>6</sub>) δ 8.40 (t, *J* = 2.0 Hz, 1H), 7.70 (d, *J* = 1.9 Hz, 1H), 7.69 – 7.63 (m, 4H), 7.59 (d, *J* = 8.3 Hz, 2H), 7.46 (dd, *J* = 8.4, 6.9 Hz, 2H), 7.40 – 7.34 (m, 1H), 7.26 (ddd, *J* = 8.4, 7.2, 1.6 Hz, 1H), 7.21 (d, *J* = 1.7 Hz, 1H), 6.79 (dd, *J* = 8.2, 1.0 Hz, 1H), 6.69 (td, *J* = 7.5, 1.1 Hz, 1H), 5.82 (t, *J* = 1.8 Hz, 1H); <sup>13</sup>C NMR (101 MHz, DMSO) δ 163.65, 147.86, 140.83, 140.35, 139.72, 133.37, 128.97, 127.59, 127.49, 127.41, 126.72, 126.66, 117.17, 115.00, 114.46, 66.24.

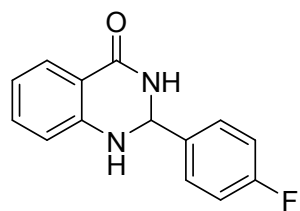

**2-(4-fluorophenyl)-2,3-dihydroquinazolin-4(1H)-one (3h):** White powder, 89%. <sup>1</sup>H NMR (400 MHz, DMSO-*d*<sub>6</sub>) δ 8.29 (d, *J* = 2.3 Hz, 1H), 7.61 (dd, *J* = 7.8, 1.5 Hz, 1H), 7.57 – 7.54 (m, 1H), 7.54 – 7.50 (m, 1H), 7.27 – 7.19 (m, 3H), 7.10 (s, 1H), 6.74 (d, *J* = 8.1 Hz, 1H), 6.71 – 6.66 (m, 1H), 5.77 (t, *J* =

1.7 Hz, 1H);  $^{13}\text{C}$  NMR (101 MHz, DMSO)  $\delta$  164.01, 161.35, 148.26, 138.25, 133.82, 129.54, 129.46, 127.82, 117.71, 115.66, 115.45, 115.40, 114.89, 66.38.

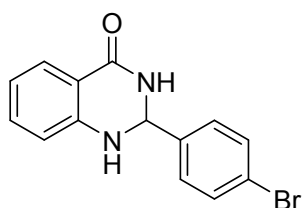

**2-(4-bromophenyl)-2,3-dihydroquinazolin-4(1H)-one (3i):** White powder, 85%.  $^1\text{H}$  NMR (400 MHz, DMSO- $d_6$ )  $\delta$  8.35 (t,  $J = 1.9$  Hz, 1H), 7.62 – 7.60 (m, 1H), 7.59 (dd,  $J = 3.0, 1.5$  Hz, 1H), 7.58 (s, 1H), 7.45 (d,  $J = 2.0$  Hz, 1H), 7.43 (d,  $J = 2.0$  Hz, 1H), 7.25 (ddd,  $J = 8.6, 7.2, 1.6$  Hz, 1H), 7.15 (d,  $J = 1.8$  Hz, 1H), 6.74 (dd,  $J = 8.2, 1.0$  Hz, 1H), 6.68 (td,  $J = 7.5, 1.1$  Hz, 1H), 5.75 (t,  $J = 2.0$  Hz, 1H);  $^{13}\text{C}$  NMR (101 MHz, DMSO)  $\delta$  163.46, 147.62, 141.08, 133.39, 131.22, 129.08, 127.35, 121.56, 117.28, 114.92, 114.45, 65.78.

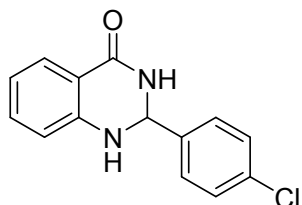

**2-(4-chlorophenyl)-2,3-dihydroquinazolin-4(1H)-one (3j):** White powder, 92%.  $^1\text{H}$  NMR (400 MHz, DMSO- $d_6$ )  $\delta$  8.35 (t,  $J = 2.0$  Hz, 1H), 7.61 (dd,  $J = 7.8, 1.6$  Hz, 1H), 7.53 – 7.44 (m, 4H), 7.25 (ddd,  $J = 8.6, 7.2, 1.6$  Hz, 1H), 7.15 (d,  $J = 1.7$  Hz, 1H), 6.74 (dd,  $J = 8.2, 1.0$  Hz, 1H), 6.68 (td,  $J = 7.5, 1.1$  Hz, 1H), 5.77 (t,  $J = 2.0$  Hz, 1H);  $^{13}\text{C}$  NMR (101 MHz, DMSO)  $\delta$  163.48, 147.64, 140.66, 133.39, 132.95, 128.76, 128.30, 127.35, 117.27, 114.93, 114.45, 65.74.

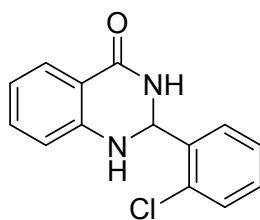

**2-(2-chlorophenyl)-2,3-dihydroquinazolin-4(1H)-one (3k):** White powder, 98%.  $^1\text{H}$  NMR (400 MHz, DMSO- $d_6$ )  $\delta$  8.23 (t,  $J = 1.9$  Hz, 1H), 7.69 – 7.64 (m, 2H), 7.49 (dt,  $J = 7.4, 3.7$  Hz, 1H), 7.40 (dd,  $J = 5.9, 3.5$  Hz, 2H), 7.26 (ddd,  $J = 8.5, 7.2, 1.6$  Hz, 1H), 7.02 (d,  $J = 2.0$  Hz, 1H), 6.77 (dd,  $J = 8.2, 1.0$  Hz, 1H), 6.72 (td,  $J = 7.5, 1.0$  Hz, 1H), 6.14 (t,  $J = 1.7$  Hz, 1H);  $^{13}\text{C}$  NMR (101 MHz, DMSO)  $\delta$  163.63, 147.65, 137.85, 133.43, 131.84, 130.29, 129.57, 128.74, 127.46, 127.37, 117.44, 114.67, 114.56, 63.69.

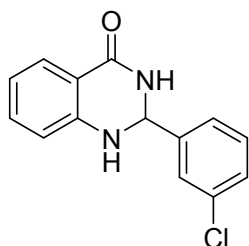



**2-(3-chlorophenyl)-2,3-dihydroquinazolin-4(1H)-one (3l):** White powder, 83%. <sup>1</sup>H NMR (400 MHz, DMSO-*d*<sub>6</sub>) δ 8.41 (t, *J* = 2.0 Hz, 1H), 7.61 (dd, *J* = 7.8, 1.5 Hz, 1H), 7.53 (d, *J* = 1.5 Hz, 1H), 7.47 – 7.43 (m, 1H), 7.43 – 7.38 (m, 2H), 7.26 (ddd, *J* = 8.5, 7.3, 1.6 Hz, 1H), 7.22 (d, *J* = 1.8 Hz, 1H), 6.76 (d, *J* = 8.1 Hz, 1H), 6.71 – 6.66 (m, 1H), 5.78 (t, *J* = 2.2 Hz, 1H); <sup>13</sup>C NMR (101 MHz, DMSO) δ 163.41, 147.49, 144.37, 133.46, 132.96, 130.30, 128.26, 127.36, 126.75, 125.40, 117.32, 114.89, 114.46, 65.56.

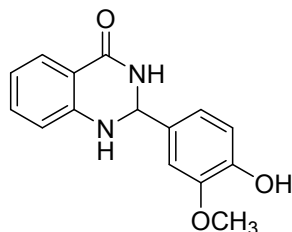

**2-(4-hydroxy-3-methoxyphenyl)-2,3-dihydroquinazolin-4(1H)-one (3m):** White powder, 95%. <sup>1</sup>H NMR (400 MHz, DMSO-*d*<sub>6</sub>) δ 9.08 (s, 1H), 8.11 (s, 1H), 7.61 (d, *J* = 7.6 Hz, 1H), 7.27 – 7.21 (m, 1H), 7.09 (d, *J* = 2.0 Hz, 1H), 6.96 (s, 1H), 6.88 (dd, *J* = 8.0, 2.0 Hz, 1H), 6.75 (dd, *J* = 8.1, 5.4 Hz, 2H), 6.67 (t, *J* = 7.5 Hz, 1H), 5.65 (s, 1H), 3.76 (s, 3H); <sup>13</sup>C NMR (101 MHz, DMSO) δ 163.76, 148.18, 147.39, 146.88, 133.18, 131.89, 127.33, 119.63, 117.08, 115.02, 114.89, 114.40, 111.10, 66.82, 55.58.

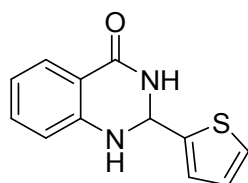

**2-(thiophen-2-yl)-2,3-dihydroquinazolin-4(1H)-one (3n):** Light yellow powder, 88%. <sup>1</sup>H NMR (400 MHz, DMSO-*d*<sub>6</sub>) δ 8.46 (s, 1H), 7.62 (d, *J* = 8.5 Hz, 1H), 7.53 – 7.40 (m, 1H), 7.26 (s, 2H), 7.18 – 7.08 (m, 1H), 6.99 (dt, *J* = 9.1, 4.5 Hz, 1H), 6.82 – 6.64 (m, 2H), 6.02 (s, 1H); <sup>13</sup>C NMR (101 MHz, DMSO) δ 163.10, 147.23, 146.41, 133.36, 127.30, 126.44, 125.89, 125.70, 117.50, 115.09, 114.68, 62.54.

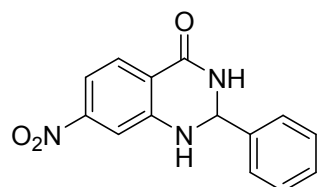

**7-nitro-2-phenyl-2,3-dihydroquinazolin-4(1H)-one (3o):** Yellow powder, 91%. <sup>1</sup>H NMR (400 MHz, DMSO-*d*<sub>6</sub>) δ 8.75 (s, 1H), 7.86 (d, *J* = 8.5 Hz, 1H), 7.78 (s, 1H), 7.60 (d, *J* = 2.3 Hz, 1H), 7.56 – 7.50 (m, 2H), 7.47 – 7.32 (m, 4H), 5.94 (t, *J* = 1.8 Hz, 1H); <sup>13</sup>C NMR (101 MHz, DMSO) δ 161.94, 150.81, 148.23, 141.04, 129.15, 128.82, 128.58, 126.82, 119.26, 111.04, 108.90, 66.50.

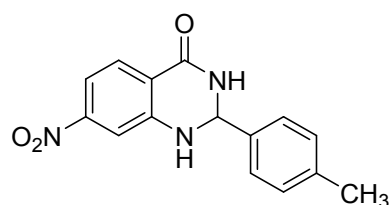

**7-nitro-2-(p-tolyl)-2,3-dihydroquinazolin-4(1H)-one (3p):** Yellow powder, 90%. <sup>1</sup>H NMR (400 MHz, DMSO-*d*<sub>6</sub>) δ 8.69 (d, *J* = 2.4 Hz, 1H), 7.83 (d, *J* = 8.5 Hz, 1H), 7.72 (s, 1H), 7.57 (d, *J* = 2.2 Hz, 1H), 7.42 (dd, *J* = 8.5, 2.2 Hz, 1H), 7.37 (d, *J* = 7.9 Hz, 2H), 7.21 (d, *J* = 7.8 Hz, 2H), 5.87 (t, *J* = 1.8 Hz,

1H), 2.30 (s, 3H); <sup>13</sup>C NMR (101 MHz, DMSO) δ 161.88, 150.74, 148.20, 138.09, 129.10, 129.01, 126.65, 119.28, 110.95, 108.83, 66.17, 20.72.

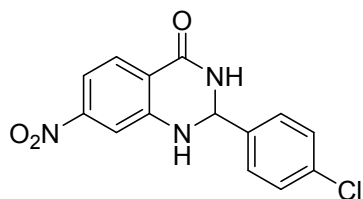

**2-(4-chlorophenyl)-7-nitro-2,3-dihydroquinazolin-4(1H)-one (3q):** Yellow powder, 89%. <sup>1</sup>H NMR (400 MHz, DMSO-*d*<sub>6</sub>) δ 8.78 (t, *J* = 1.9 Hz, 1H), 7.84 (d, *J* = 8.5 Hz, 1H), 7.78 (s, 1H), 7.58 (d, *J* = 2.2 Hz, 1H), 7.50 (q, *J* = 8.6 Hz, 4H), 7.43 (dd, *J* = 8.5, 2.2 Hz, 1H), 5.95 (t, *J* = 1.9 Hz, 1H); <sup>13</sup>C NMR (101 MHz, DMSO) δ 161.81, 150.80, 148.01, 140.04, 133.37, 129.16, 128.68, 128.56, 119.21, 111.19, 108.96, 65.67.

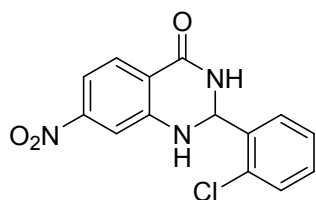

**2-(2-chlorophenyl)-7-nitro-2,3-dihydroquinazolin-4(1H)-one (3r):** Yellow powder, 92%. <sup>1</sup>H NMR (400 MHz, DMSO-*d*<sub>6</sub>) δ 8.65 (d, *J* = 1.9 Hz, 1H), 7.88 (d, *J* = 8.5 Hz, 1H), 7.68 (s, 1H), 7.63 (dd, *J* = 5.9, 3.6 Hz, 1H), 7.60 (d, *J* = 2.2 Hz, 1H), 7.55 – 7.50 (m, 1H), 7.46 (dd, *J* = 8.6, 2.3 Hz, 1H), 7.42 (dd, *J* = 5.9, 3.5 Hz, 2H), 6.29 (t, *J* = 1.7 Hz, 1H); <sup>13</sup>C NMR (101 MHz, DMSO) δ 161.91, 150.84, 147.89, 137.43, 131.81, 130.63, 129.81, 129.15, 128.66, 127.69, 118.85, 111.24, 109.03, 63.81.

### Compound data of xanthene (5a-5u).

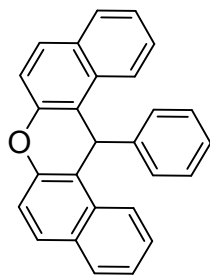

**14-phenyl-14H-dibenzo[a,j]xanthenes (5a):** White powder, 97 %.  $^1\text{H}$  NMR (400 MHz,  $\text{DMSO-}d_6$ )  $\delta$  8.69 (d,  $J = 8.5$  Hz, 2H), 7.93 (dd,  $J = 8.7, 2.1$  Hz, 4H), 7.62 (ddd,  $J = 8.3, 6.5, 1.4$  Hz, 4H), 7.56 (d,  $J = 8.9$  Hz, 2H), 7.50 – 7.41 (m, 2H), 7.14 (t,  $J = 7.7$  Hz, 2H), 6.96 (s, 1H), 6.72 (s, 1H).  $^{13}\text{C}$  NMR (100 MHz,  $\text{DMSO-}d_6$ )  $\delta$  147.94, 145.55, 130.87, 130.62, 129.00, 128.59, 128.37, 127.94, 126.93, 126.24, 124.53, 123.42, 117.68, 117.42, 36.47.

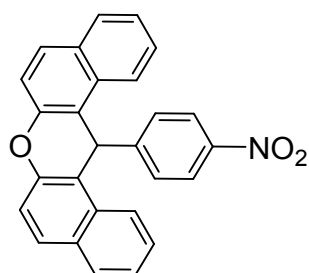

**14-(4-nitrophenyl)-14H-dibenzo[a,j]xanthenes (5b):** Yellow powder, 98%.  $^1\text{H}$  NMR (400 MHz,  $\text{DMSO-}d_6$ )  $\delta$  8.69 (d,  $J = 8.6$  Hz, 2H), 7.93 (dt,  $J = 18.4, 9.2$  Hz, 8H), 7.64 (t,  $J = 7.7$  Hz, 2H), 7.58 (d,  $J = 8.9$  Hz, 2H), 7.45 (t,  $J = 7.6$  Hz, 2H), 6.92 (s, 1H).  $^{13}\text{C}$  NMR (100 MHz,  $\text{DMSO-}d_6$ )  $\delta$  152.64, 147.98, 145.77, 130.73, 130.63, 129.58, 129.03, 128.69, 127.20, 124.72, 123.67, 123.18, 117.75, 116.17, 36.32.

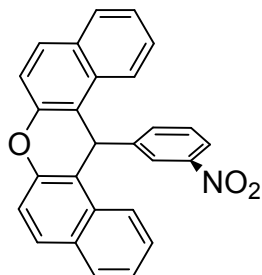

**14-(3-nitrophenyl)-14H-dibenzo[a,j]xanthenes (5c):** Light yellow powder, 97%.  $^1\text{H}$  NMR (400 MHz,  $\text{DMSO-}d_6$ )  $\delta$  8.75 (d,  $J = 8.5$  Hz, 2H), 8.48 (t,  $J = 2.0$  Hz, 1H), 8.16 (dt,  $J = 7.9, 1.3$  Hz, 1H), 8.02 – 7.88 (m, 4H), 7.83 (ddd,  $J = 8.3, 2.3, 1.0$  Hz, 1H), 7.71 – 7.55 (m, 4H), 7.46 (t,  $J = 7.9$  Hz, 3H), 6.97 (s, 1H).  $^{13}\text{C}$  NMR (100 MHz,  $\text{DMSO-}d_6$ )  $\delta$  148.12, 147.84, 147.48, 134.29, 130.68, 130.64, 129.94, 129.61, 128.72, 127.25, 124.77, 123.18, 122.04, 121.58, 117.73, 116.48, 35.92.

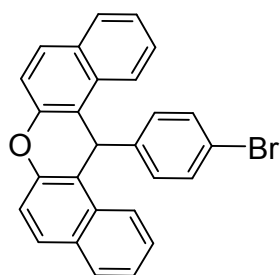

**14-(4-bromophenyl)-14H-dibenzo[a,j]xanthene (5d):** White powder, 97%.  $^1\text{H}$  NMR (400 MHz,  $\text{DMSO-}d_6$ )  $\delta$  8.65 (d,  $J = 8.5$  Hz, 2H), 7.92 (d,  $J = 8.5$  Hz, 4H), 7.71 – 7.51 (m, 6H), 7.45 (t,  $J = 7.5$  Hz, 2H), 7.32 (d,  $J = 8.1$  Hz, 2H), 6.73 (s, 1H).  $^{13}\text{C}$  NMR (100 MHz,  $\text{DMSO-}d_6$ )  $\delta$  147.89, 144.82, 131.24, 130.74, 130.60, 130.02, 129.17, 128.60, 127.00, 124.57, 123.24, 119.41, 117.65, 116.82, 35.89.

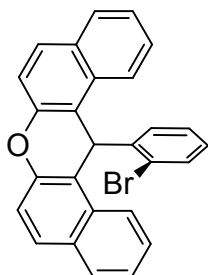

**14-(2-bromophenyl)-14H-dibenzo[a,j]xanthene (5e):** White powder, 94%.  $^1\text{H}$  NMR (400 MHz,  $\text{DMSO-}d_6$ )  $\delta$  8.68 (d,  $J = 8.5$  Hz, 2H), 7.91 (dd,  $J = 8.5, 4.9$  Hz, 4H), 7.60 (ddd,  $J = 8.4, 6.8, 1.4$  Hz, 2H), 7.50 (d,  $J = 8.9$  Hz, 2H), 7.48 – 7.41 (m, 3H), 7.40 – 7.32 (m, 1H), 7.14 – 7.00 (m, 1H), 6.88 (td,  $J = 7.6, 1.7$  Hz, 1H), 6.58 (s, 1H).  $^{13}\text{C}$  NMR (100 MHz,  $\text{DMSO-}d_6$ )  $\delta$  148.19, 144.72, 133.25, 131.76, 130.95, 130.51, 129.43, 128.76, 128.71, 126.86, 124.58, 123.39, 120.53, 117.86, 116.96, 36.65.

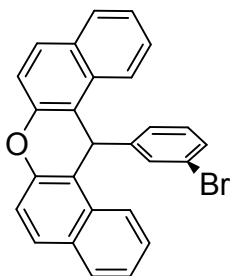

**14-(3-bromophenyl)-14H-dibenzo[a,j]xanthene (5f):** White powder, 95%.  $^1\text{H}$  NMR (400 MHz,  $\text{DMSO-}d_6$ )  $\delta$  8.70 (d,  $J = 8.5$  Hz, 2H), 7.92 (d,  $J = 8.8$  Hz, 4H), 7.72 – 7.62 (m, 3H), 7.58 (dd,  $J = 15.3, 8.4$  Hz, 3H), 7.45 (ddd,  $J = 8.0, 6.8, 1.0$  Hz, 2H), 7.16 (t,  $J = 7.9$  Hz, 1H), 7.08 – 6.99 (m, 1H), 6.77 (s, 1H).  $^{13}\text{C}$  NMR (100 MHz,  $\text{DMSO-}d_6$ )  $\delta$  147.99, 147.78, 133.01, 130.72, 130.60, 130.26, 129.28, 128.63, 127.44, 127.07, 126.57, 126.37, 124.62, 123.22, 117.64, 116.78, 36.03.

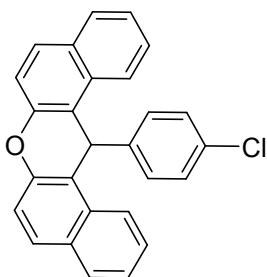

**14-(4-chlorophenyl)-14H-dibenzo[a,j]xanthenes (5g):** White powder, 97%.  $^1\text{H}$  NMR (400 MHz,  $\text{DMSO-}d_6$ )  $\delta$  8.66 (d,  $J = 8.5$  Hz, 2H), 7.92 (d,  $J = 8.6$  Hz, 4H), 7.63 (t,  $J = 7.6$  Hz, 4H), 7.55 (d,  $J = 8.9$  Hz, 2H), 7.45 (t,  $J = 7.5$  Hz, 2H), 7.19 (d,  $J = 8.1$  Hz, 2H), 6.75 (s, 1H).  $^{13}\text{C}$  NMR (100 MHz,  $\text{DMSO-}d_6$ )  $\delta$  147.91, 144.41, 130.89, 130.75, 130.61, 129.64, 129.17, 128.61, 128.33, 127.00, 124.57, 123.26, 117.65, 116.91, 35.81.

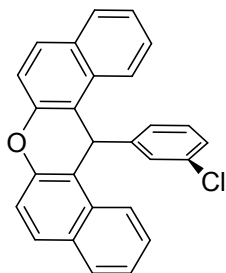

**14-(3-chlorophenyl)-14H-dibenzo[a,j]xanthenes (5h):** White powder, 94%.  $^1\text{H}$  NMR (400 MHz,  $\text{DMSO-}d_6$ )  $\delta$  8.70 (d,  $J = 8.5$  Hz, 2H), 7.94 (d,  $J = 8.8$  Hz, 4H), 7.81 (t,  $J = 1.9$  Hz, 1H), 7.65 (ddd,  $J = 8.2, 6.9, 1.3$  Hz, 3H), 7.57 (d,  $J = 8.9$  Hz, 2H), 7.46 (ddd,  $J = 8.0, 6.8, 1.0$  Hz, 2H), 7.22 – 7.06 (m, 2H), 6.76 (s, 1H).  $^{13}\text{C}$  NMR (100 MHz,  $\text{DMSO-}d_6$ )  $\delta$  148.03, 147.98, 130.71, 130.61, 130.57, 130.28, 129.30, 129.27, 128.64, 127.08, 126.94, 124.64, 123.22, 121.74, 117.65, 116.79, 36.00.

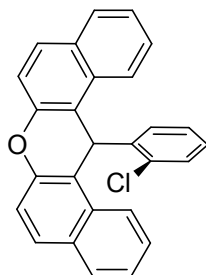

**14-(2-chlorophenyl)-14H-dibenzo[a,j]xanthenes (5i):** White powder, 96%.  $^1\text{H}$  NMR (400 MHz,  $\text{DMSO-}d_6$ )  $\delta$  8.58 (d,  $J = 8.5$  Hz, 2H), 8.01 – 7.84 (m, 4H), 7.62 (ddd,  $J = 8.4, 6.9, 1.4$  Hz, 2H), 7.53 (d,  $J = 8.9$  Hz, 2H), 7.50 – 7.39 (m, 3H), 7.31 (dd,  $J = 7.9, 1.4$  Hz, 1H), 7.04 (ddd,  $J = 20.0, 7.7, 1.7$  Hz, 2H), 6.72 (s, 1H).  $^{13}\text{C}$  NMR (100 MHz,  $\text{DMSO-}d_6$ )  $\delta$  148.25, 142.76, 131.64, 130.95, 130.51, 129.89, 129.85, 129.45, 128.78, 128.52, 128.14, 127.03, 124.59, 122.91, 117.81, 116.48, 34.42.

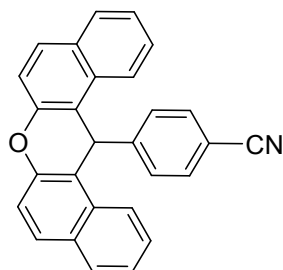

**4-(14H-dibenzo[a,j]xanthen-14-yl)benzonitrile (5j):** White powder, 97%.  $^1\text{H}$  NMR (400 MHz,  $\text{DMSO-}d_6$ )  $\delta$  8.68 (d,  $J = 8.5$  Hz, 2H), 7.94 (dd,  $J = 8.6, 5.0$  Hz, 4H), 7.83 (d,  $J = 8.1$  Hz, 2H), 7.70 – 7.53 (m, 6H), 7.46 (t,  $J = 7.5$  Hz, 2H), 6.86 (s, 1H).  $^{13}\text{C}$  NMR (100 MHz,  $\text{DMSO-}d_6$ )  $\delta$  150.70, 148.01, 132.44, 130.73, 130.62, 129.50, 128.79, 128.69, 127.18, 124.72, 123.18, 118.47, 117.72, 116.34, 109.26, 36.47.

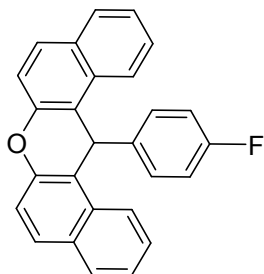

**14-(4-fluorophenyl)-14H-dibenzo[a,j]xanthene (5k):** White powder, 96%. <sup>1</sup>H NMR (400 MHz, DMSO-*d*<sub>6</sub>) δ 8.69 (d, *J* = 8.5 Hz, 2H), 7.93 (dd, *J* = 9.2, 2.1 Hz, 4H), 7.72 – 7.59 (m, 4H), 7.56 (d, *J* = 8.9 Hz, 2H), 7.46 (ddd, *J* = 7.9, 6.8, 1.0 Hz, 2H), 7.08 – 6.87 (m, 2H), 6.76 (s, 1H). <sup>13</sup>C NMR (100 MHz, DMSO-*d*<sub>6</sub>) δ 147.93, 141.79, 141.75, 130.78, 130.64, 129.73, 129.65, 129.10, 128.63, 127.00, 124.58, 123.35, 117.69, 117.28, 115.24, 115.03, 35.63.

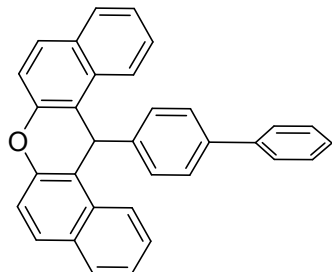

**14-([1,1'-biphenyl]-4-yl)-14H-dibenzo[a,j]xanthene (5l):** White powder, 95%. <sup>1</sup>H NMR (400 MHz, DMSO-*d*<sub>6</sub>) δ 8.74 (d, *J* = 8.6 Hz, 2H), 7.93 (d, *J* = 8.5 Hz, 4H), 7.81 – 7.54 (m, 6H), 7.43 (dt, *J* = 22.4, 8.1 Hz, 6H), 7.35 – 7.10 (m, 3H), 6.78 (s, 1H). <sup>13</sup>C NMR (100 MHz, DMSO-*d*<sub>6</sub>) δ 147.99, 144.69, 139.59, 138.23, 130.91, 130.66, 129.03, 128.69, 128.61, 128.44, 127.21, 126.99, 126.75, 126.48, 124.55, 123.43, 117.71, 117.31, 36.12.

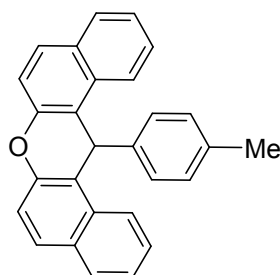

**14-(p-tolyl)-14H-dibenzo[a,j]xanthene (5m):** White powder, 94%. <sup>1</sup>H NMR (400 MHz, DMSO-*d*<sub>6</sub>) δ 8.66 (d, *J* = 8.5 Hz, 2H), 8.02 – 7.79 (m, 4H), 7.62 (ddd, *J* = 8.4, 6.8, 1.4 Hz, 2H), 7.55 (d, *J* = 8.9 Hz, 2H), 7.52 – 7.45 (m, 2H), 7.45 (ddd, *J* = 8.0, 6.8, 1.0 Hz, 2H), 6.92 (d, *J* = 7.9 Hz, 2H), 6.66 (s, 1H). <sup>13</sup>C NMR (100 MHz, DMSO-*d*<sub>6</sub>) δ 147.84, 142.65, 135.34, 130.87, 130.62, 128.88, 128.56, 127.81, 126.86, 124.47, 123.45, 117.65, 117.48, 36.10, 20.37.

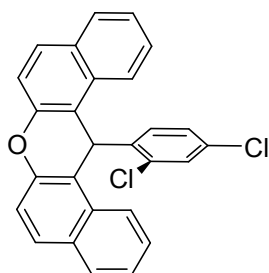

**14-(2,4-dichlorophenyl)-14H-dibenzo[a,j]xanthene (5n):** White powder, 91%. <sup>1</sup>H NMR (400 MHz, DMSO-*d*<sub>6</sub>) δ 8.53 (d, *J* = 8.5 Hz, 2H), 7.94 (d, *J* = 8.9 Hz, 4H), 7.62 (ddd, *J* = 8.4, 6.8, 1.3 Hz, 2H), 7.57 – 7.43 (m, 6H), 7.16 (dt, *J* = 8.7, 1.8 Hz, 1H), 6.75 (s, 1H). <sup>13</sup>C NMR (100 MHz, DMSO-*d*<sub>6</sub>) δ 148.27, 141.70, 133.01, 132.17, 130.85, 130.54, 129.68, 129.15, 128.84, 128.37, 127.14, 124.68, 122.80, 117.80, 115.82, 34.18.

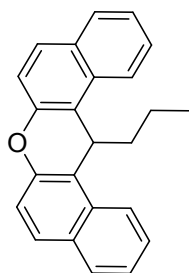

**14-propyl-14H-dibenzo[a,j]xanthene (5o):** White powder, 80%.  $^1\text{H}$  NMR (400 MHz,  $\text{DMSO-}d_6$ )  $\delta$  8.44 (d,  $J = 8.6$  Hz, 2H), 7.86 (d,  $J = 8.1$  Hz, 2H), 7.78 (d,  $J = 8.9$  Hz, 2H), 7.62 (t,  $J = 7.7$  Hz, 2H), 7.40 (dd,  $J = 19.7, 8.2$  Hz, 4H), 5.62 (t,  $J = 4.5$  Hz, 1H), 1.83 (dt,  $J = 12.8, 4.5$  Hz, 2H), 0.90 – 0.74 (m, 2H), 0.32 (t,  $J = 7.3$  Hz, 3H).  $^{13}\text{C}$  NMR (100 MHz,  $\text{DMSO-}d_6$ )  $\delta$  149.24, 130.99, 130.56, 128.52, 128.20, 126.69, 124.15, 122.85, 117.01, 116.41, 37.90, 30.16, 17.54, 13.55.

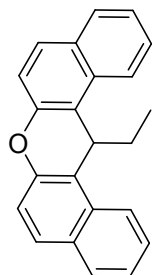

**14-ethyl-14H-dibenzo[a,j]xanthene (5p):** White powder, 72%.  $^1\text{H}$  NMR (400 MHz,  $\text{DMSO-}d_6$ )  $\delta$  8.50 (d,  $J = 8.5$  Hz, 2H), 7.94 (dd,  $J = 8.3, 1.2$  Hz, 2H), 7.87 (d,  $J = 8.9$  Hz, 2H), 7.65 (ddd,  $J = 8.4, 6.8, 1.4$  Hz, 2H), 7.52 – 7.44 (m, 2H), 7.41 (d,  $J = 8.9$  Hz, 2H), 5.69 (t,  $J = 4.4$  Hz, 1H), 1.95 (qd,  $J = 7.4, 4.3$  Hz, 2H), 0.41 (t,  $J = 7.4$  Hz, 3H).  $^{13}\text{C}$  NMR (100 MHz,  $\text{DMSO-}d_6$ )  $\delta$  149.37, 131.02, 130.61, 128.59, 128.37, 126.77, 124.28, 123.02, 117.01, 115.76, 30.69, 28.03, 27.84, 8.67.

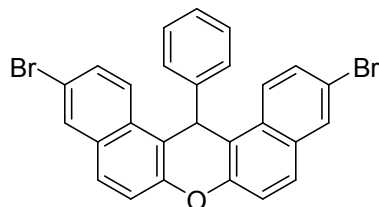

**3,11-dibromo-14-phenyl-14H-dibenzo[a,j]xanthenes (5q):** Off-white powder, 80%.  $^1\text{H}$  NMR (400 MHz,  $\text{DMSO-}d_6$ )  $\delta$  8.61 (d,  $J = 9.1$  Hz, 2H), 8.18 (d,  $J = 2.2$  Hz, 2H), 7.89 (d,  $J = 9.0$  Hz, 2H), 7.71 (dd,  $J = 9.0, 2.2$  Hz, 2H), 7.61 – 7.53 (m, 4H), 7.14 (t,  $J = 7.6$  Hz, 2H), 6.97 (t,  $J = 7.4$  Hz, 1H), 6.68 (s, 1H);  $^{13}\text{C}$  NMR (101 MHz,  $\text{DMSO}$ )  $\delta$  148.09, 145.12, 132.00, 130.36, 129.68, 129.48, 128.51, 128.34, 127.77, 126.45, 125.80, 118.94, 117.80, 117.56, 36.25.

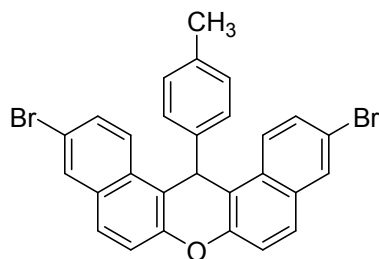

**3,11-dibromo-14-(p-tolyl)-14H-dibenzo[a,j]xanthenes (5r):** White powder, 84%.  $^1\text{H}$  NMR (400 MHz,  $\text{DMSO-}d_6$ )  $\delta$  8.57 (d,  $J = 9.2$  Hz, 2H), 8.17 (s, 2H), 7.87 (d,  $J = 9.0$  Hz, 2H), 7.70 (d,  $J = 8.9$  Hz, 2H),

7.56 (d,  $J = 8.9$  Hz, 2H), 7.42 (d,  $J = 7.7$  Hz, 2H), 6.91 (d,  $J = 7.7$  Hz, 2H), 6.61 (s, 1H), 2.01 (s, 3H);  $^{13}\text{C}$  NMR (101 MHz, DMSO)  $\delta$  148.00, 142.22, 135.60, 132.00, 130.33, 129.61, 129.47, 129.00, 128.24, 127.63, 125.84, 118.92, 117.74, 117.63, 40.13, 39.92, 39.71, 39.50, 39.29, 39.08, 38.87, 35.87, 20.37.

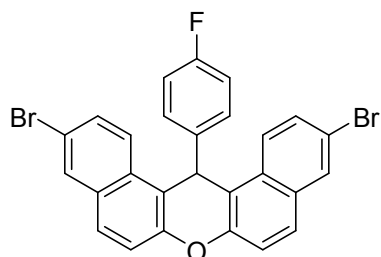

**3,11-dibromo-14-(4-fluorophenyl)-14H-dibenzo[*a,j*]xanthenes (5s)**: White powder, 68%.  $^1\text{H}$  NMR (400 MHz, DMSO- $d_6$ )  $\delta$  8.61 (d,  $J = 9.1$  Hz, 2H), 8.19 (d,  $J = 2.1$  Hz, 2H), 7.90 (d,  $J = 9.0$  Hz, 2H), 7.73 (dd,  $J = 9.0, 2.2$  Hz, 2H), 7.64 – 7.54 (m, 4H), 6.97 (t,  $J = 8.8$  Hz, 2H), 6.72 (s, 1H);  $^{13}\text{C}$  NMR (101 MHz, DMSO)  $\delta$  161.71, 159.29, 148.08, 141.36, 141.32, 132.02, 130.42, 129.76, 129.61, 129.53, 129.40, 128.46, 125.74, 118.96, 117.86, 117.43, 115.40, 115.19, 35.40.

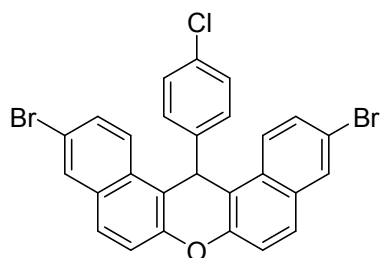

**3,11-dibromo-14-(4-chlorophenyl)-14H-dibenzo[*a,j*]xanthenes (5t)**: Light brown powder, 80%.  $^1\text{H}$  NMR (400 MHz, DMSO- $d_6$ )  $\delta$  8.59 (d,  $J = 9.1$  Hz, 2H), 8.19 (d,  $J = 2.2$  Hz, 2H), 7.90 (d,  $J = 9.0$  Hz, 2H), 7.72 (dd,  $J = 9.1, 2.1$  Hz, 2H), 7.57 (dd,  $J = 8.7, 3.7$  Hz, 4H), 7.19 (d,  $J = 8.5$  Hz, 2H), 6.71 (s, 1H);  $^{13}\text{C}$  NMR (101 MHz, DMSO)  $\delta$  148.09, 144.01, 132.02, 131.15, 130.44, 129.81, 129.52, 129.39, 128.56, 128.50, 125.70, 118.97, 117.90, 117.12, 117.10, 35.56.

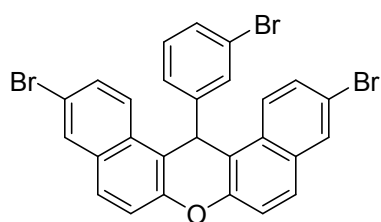

**3,11-dibromo-14-(3-bromophenyl)-14H-dibenzo[*a,j*]xanthenes (5u)**: Light yellow powder, 91%.  $^1\text{H}$  NMR (400 MHz, DMSO- $d_6$ )  $\delta$  8.62 (d,  $J = 9.1$  Hz, 2H), 8.19 (d,  $J = 2.2$  Hz, 2H), 7.91 (d,  $J = 9.0$  Hz, 2H), 7.81 – 7.72 (m, 3H), 7.58 (dd,  $J = 8.8, 3.2$  Hz, 3H), 7.19 (d,  $J = 8.0$  Hz, 1H), 7.12 (q,  $J = 7.9, 6.9$  Hz, 1H), 6.72 (s, 1H);  $^{13}\text{C}$  NMR (101 MHz, DMSO)  $\delta$  148.16, 147.60, 132.02, 130.79, 130.48, 130.12, 129.89, 129.54, 129.35, 128.70, 126.82, 125.64, 121.87, 118.97, 117.98, 116.98, 35.76.



# <sup>1</sup>H-NMR and <sup>13</sup>C-NMR spectrum of compound 3a-3n.

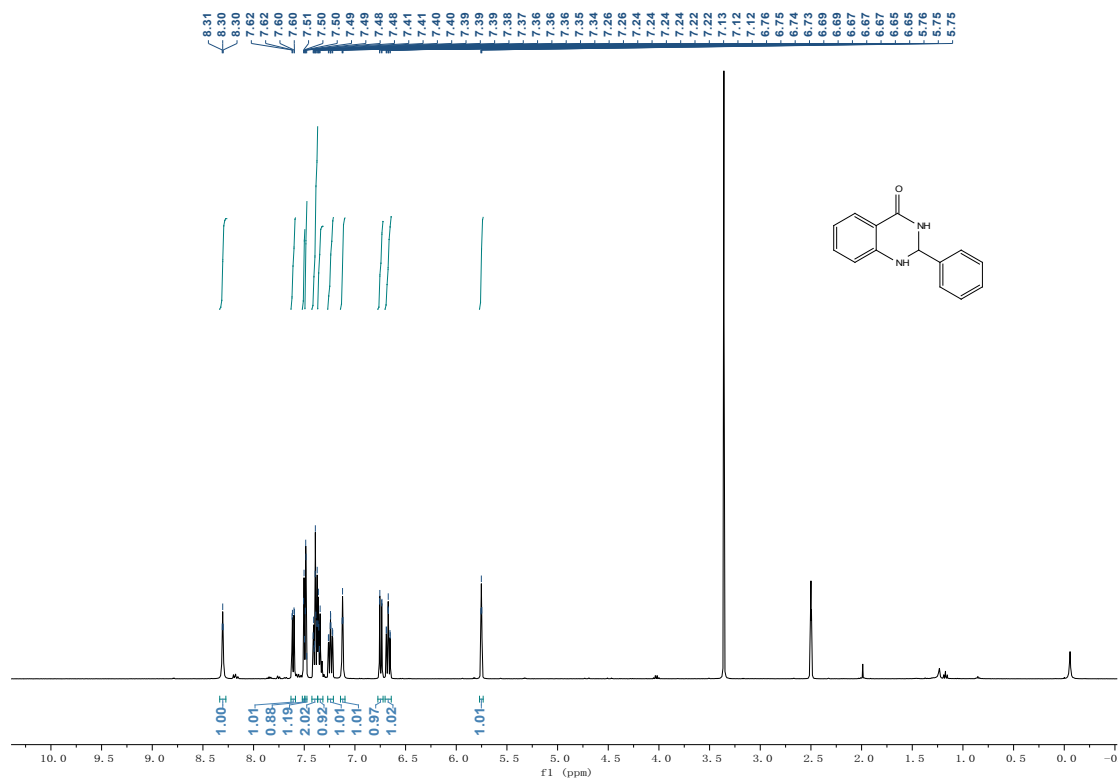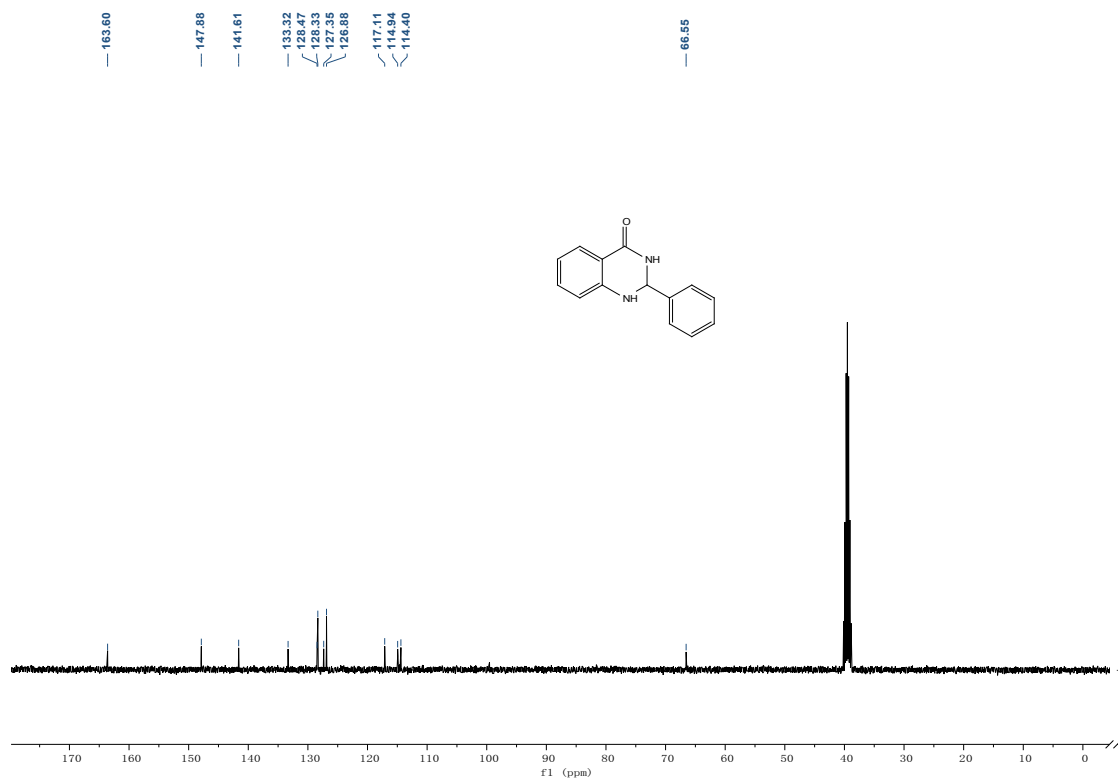

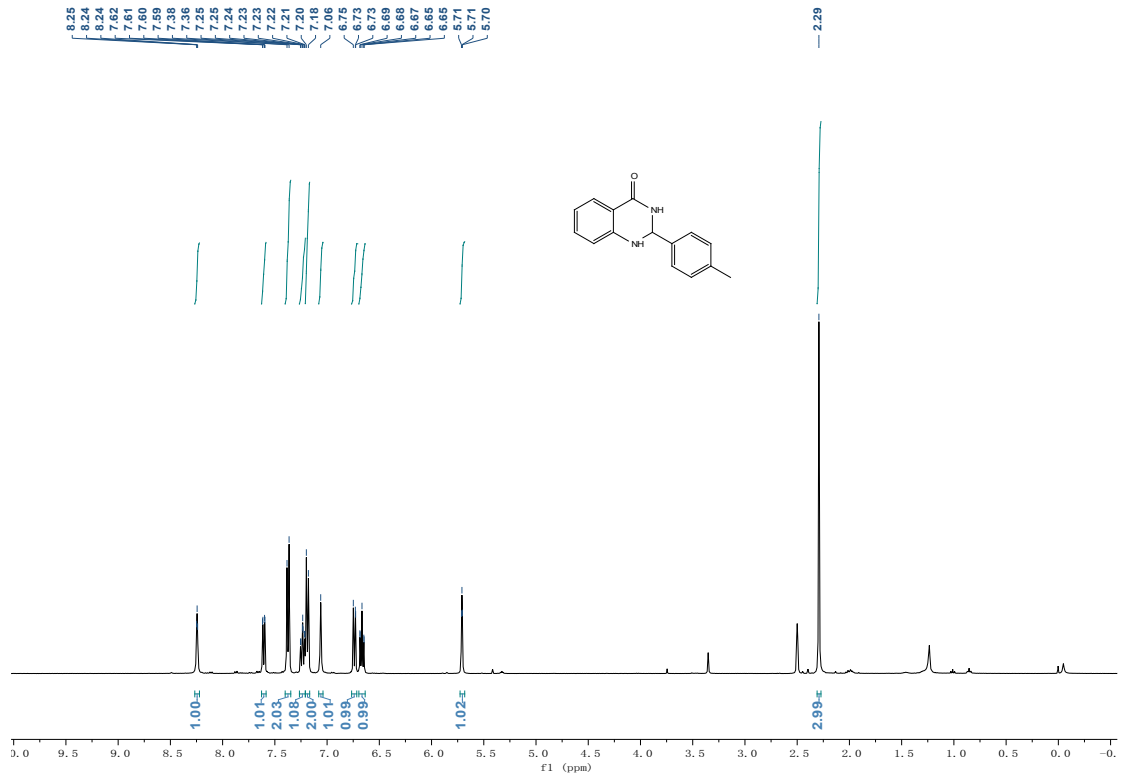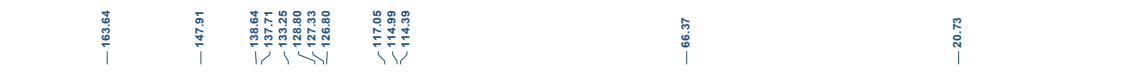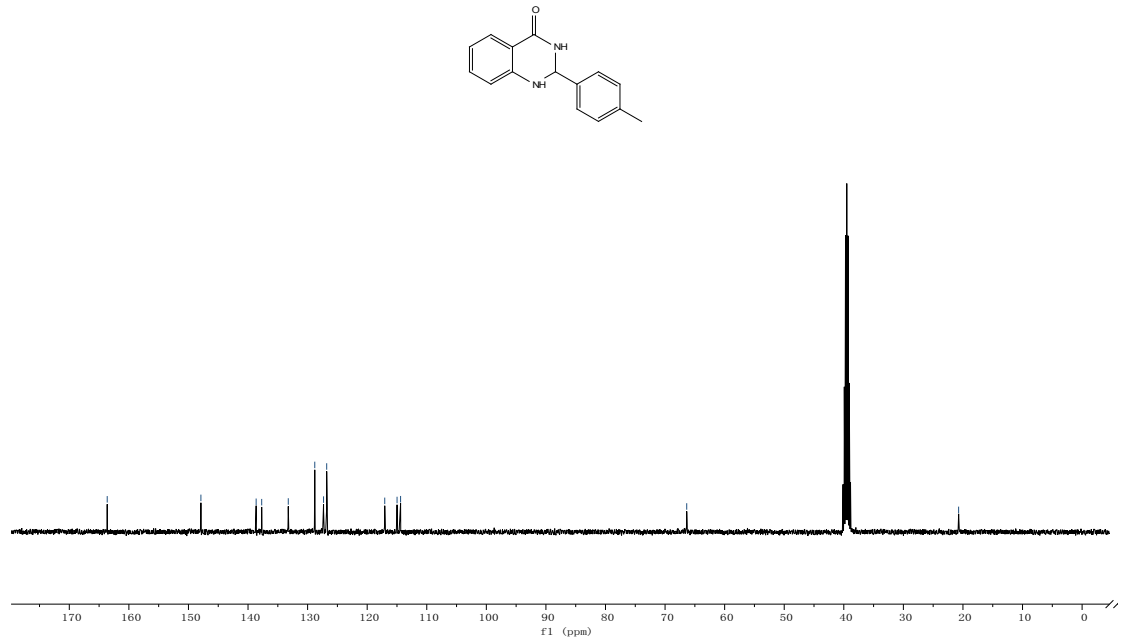

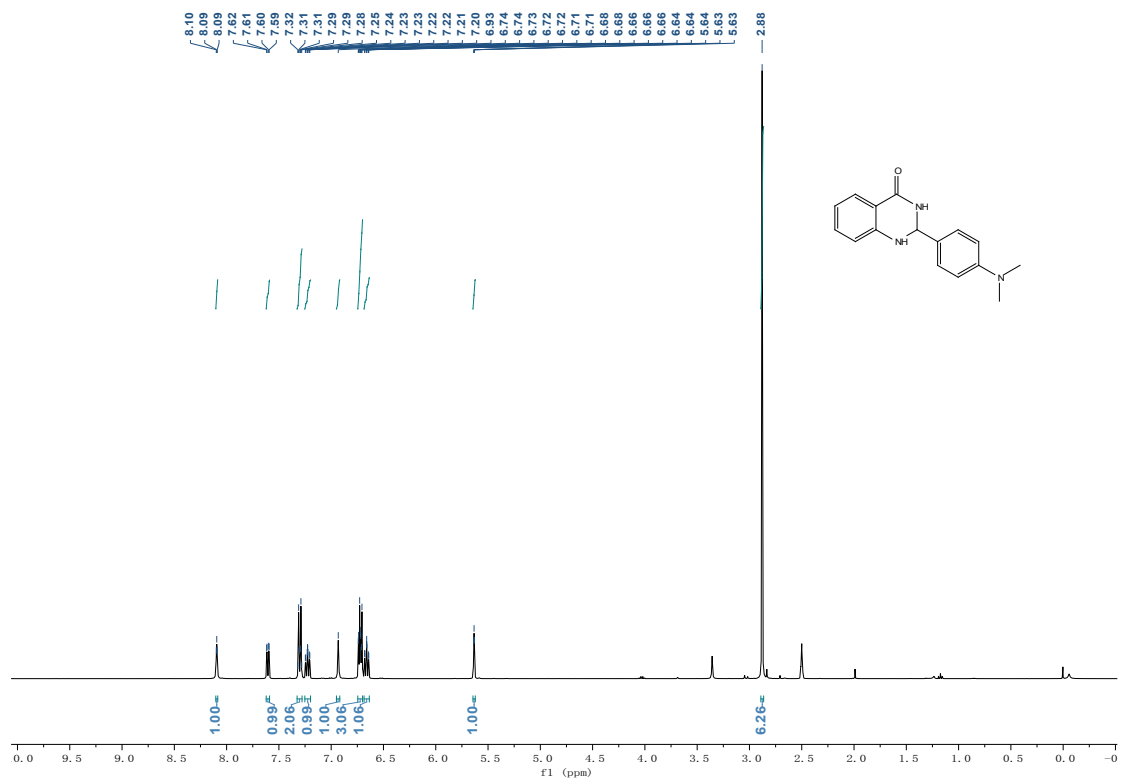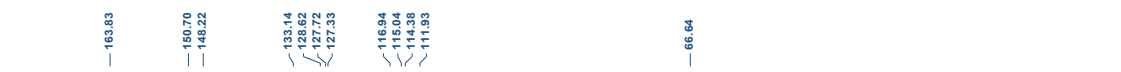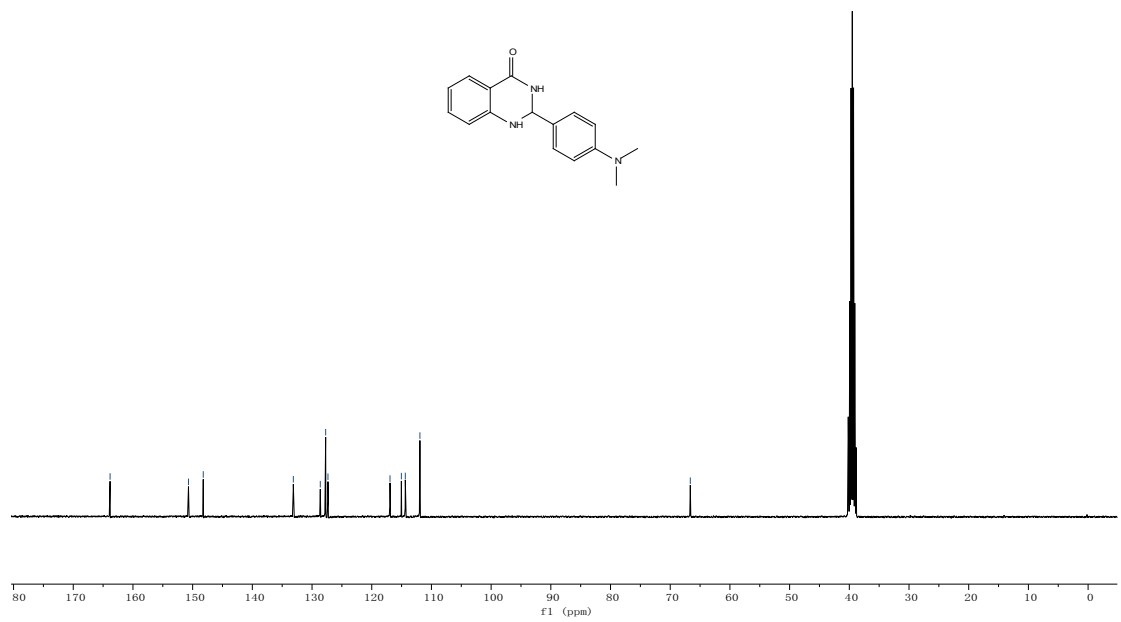

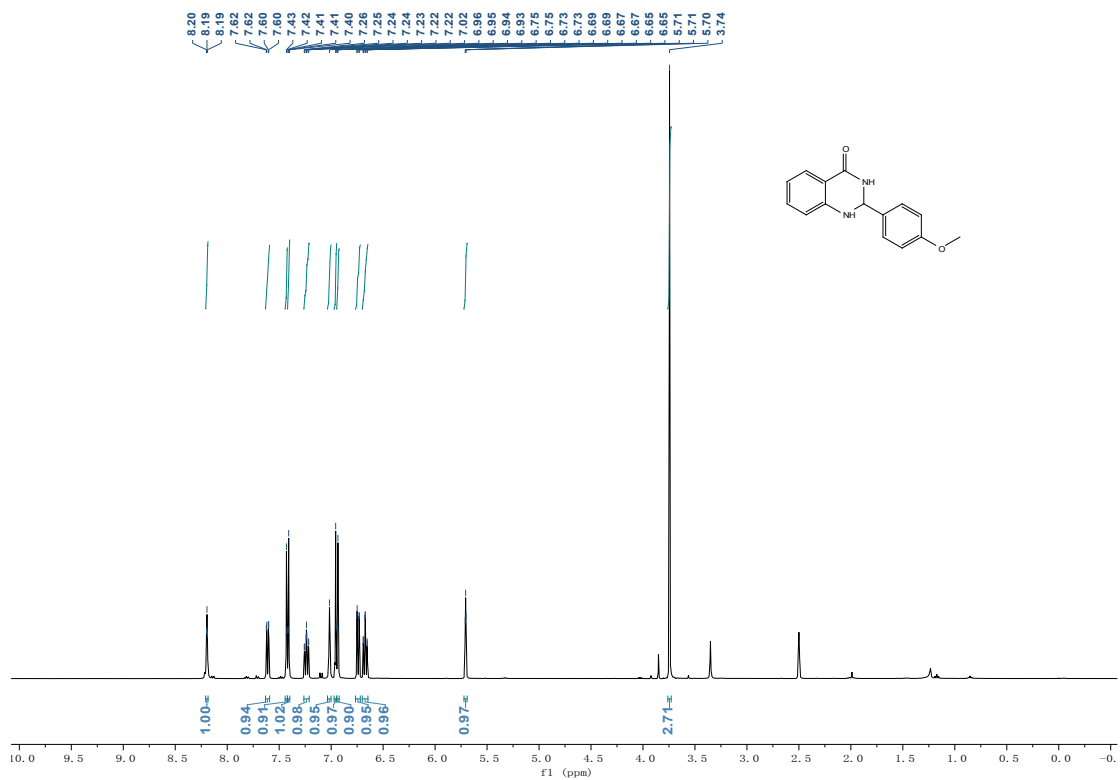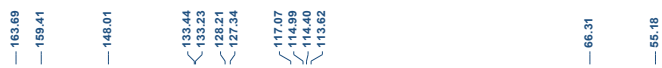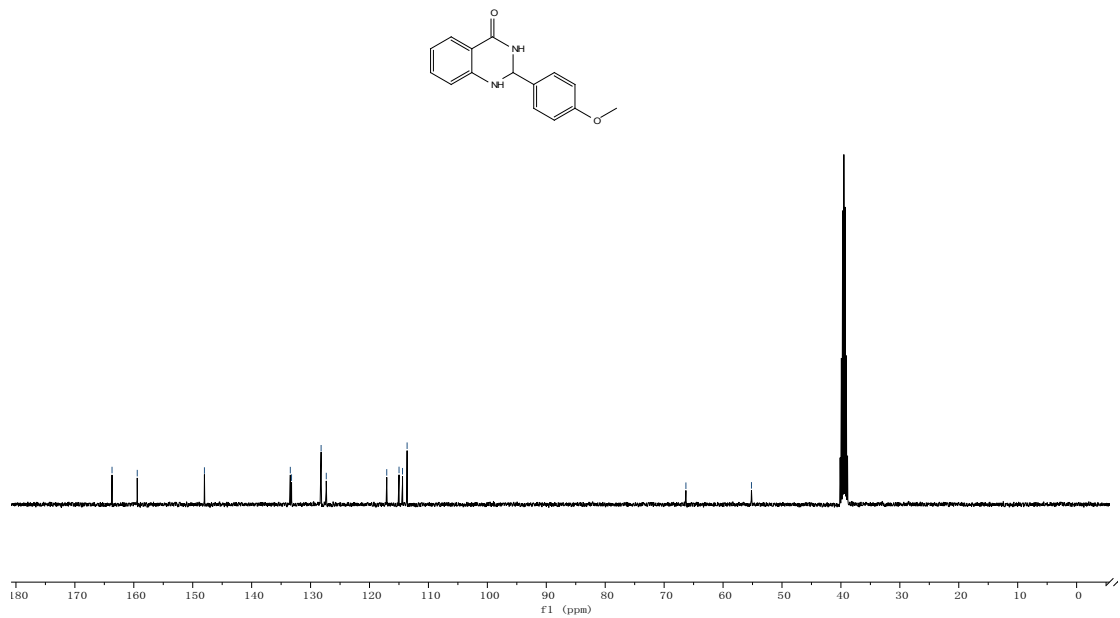

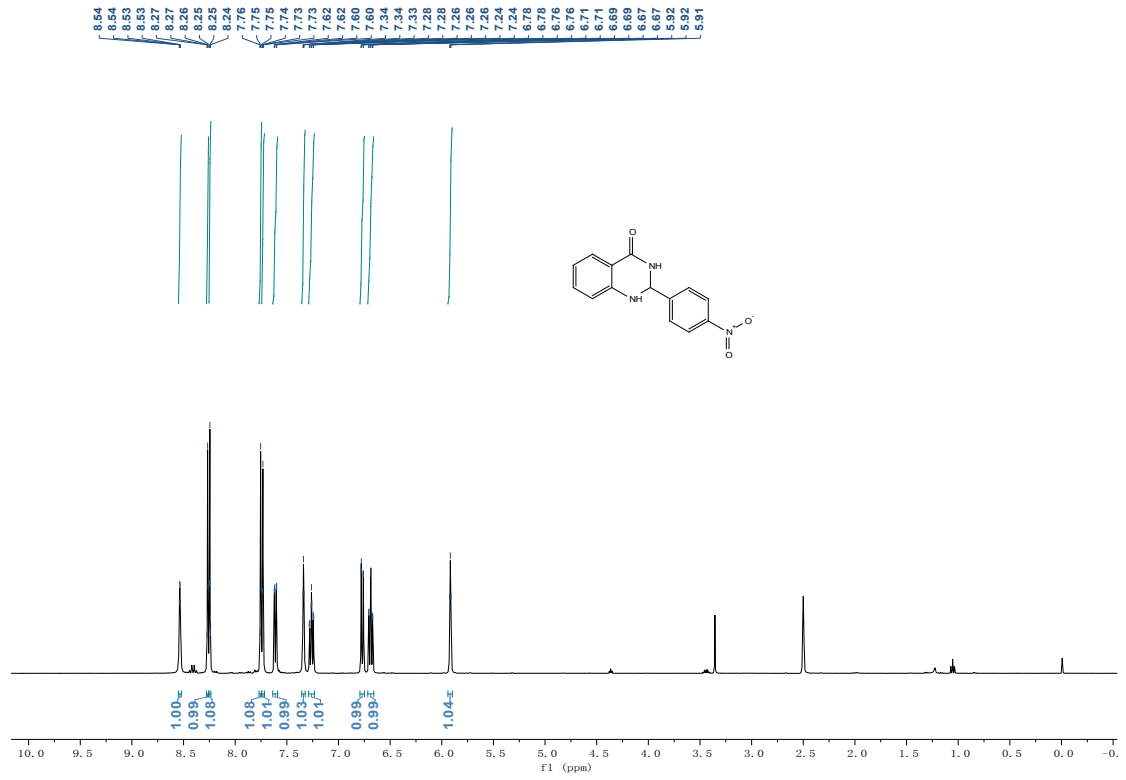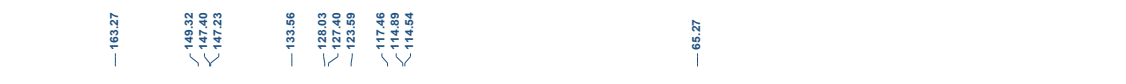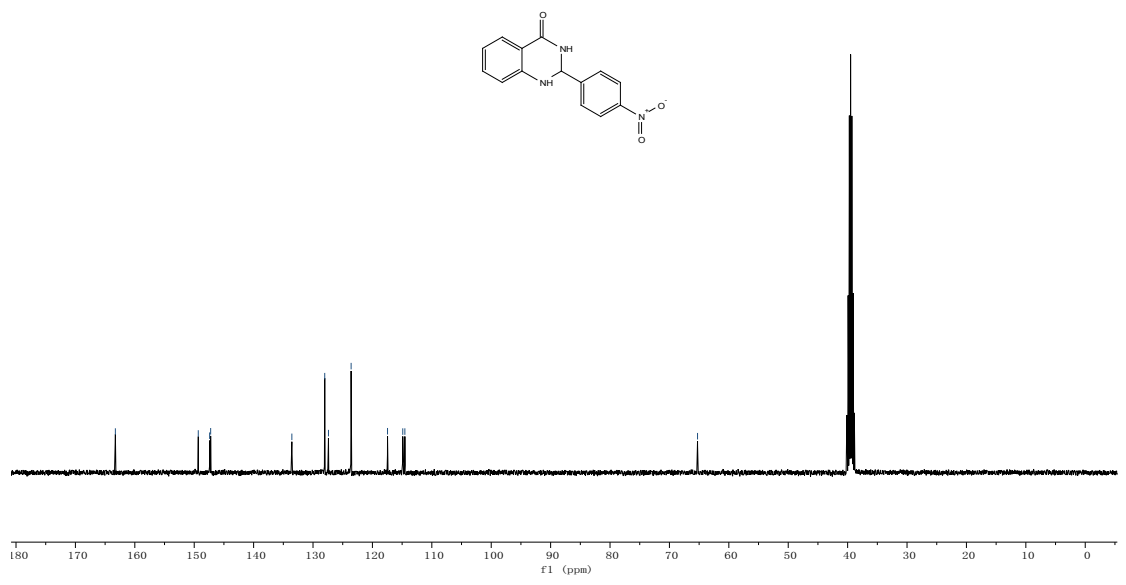

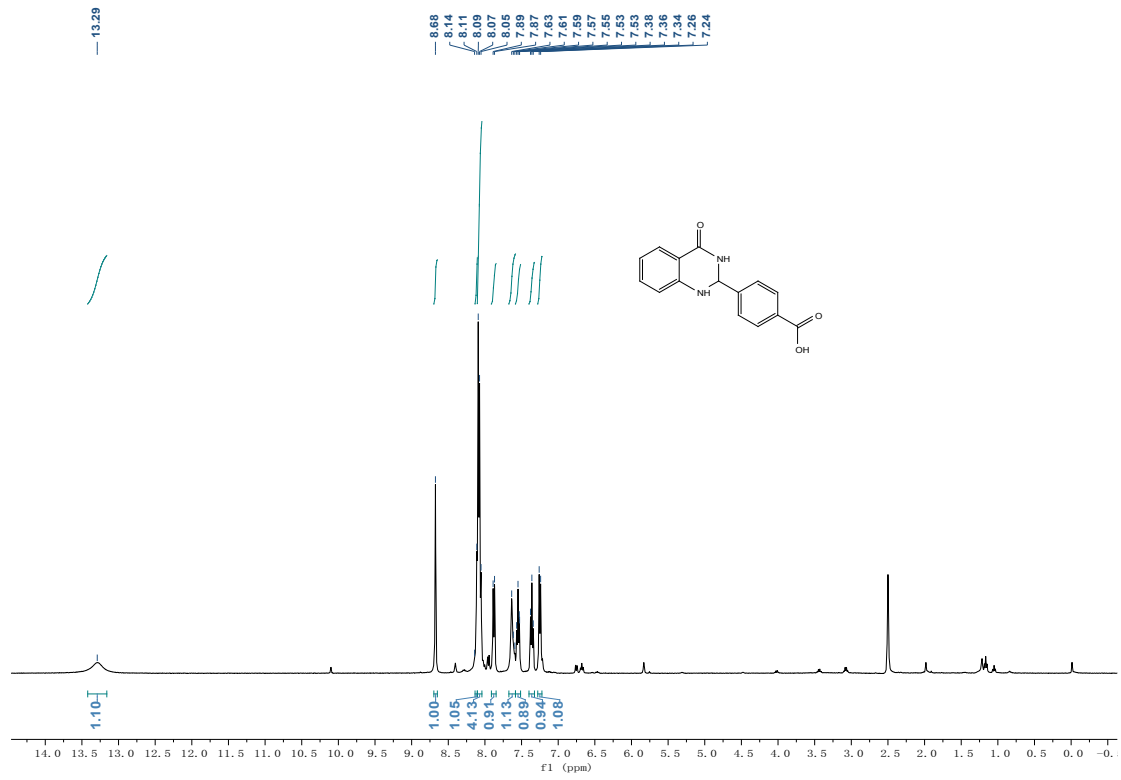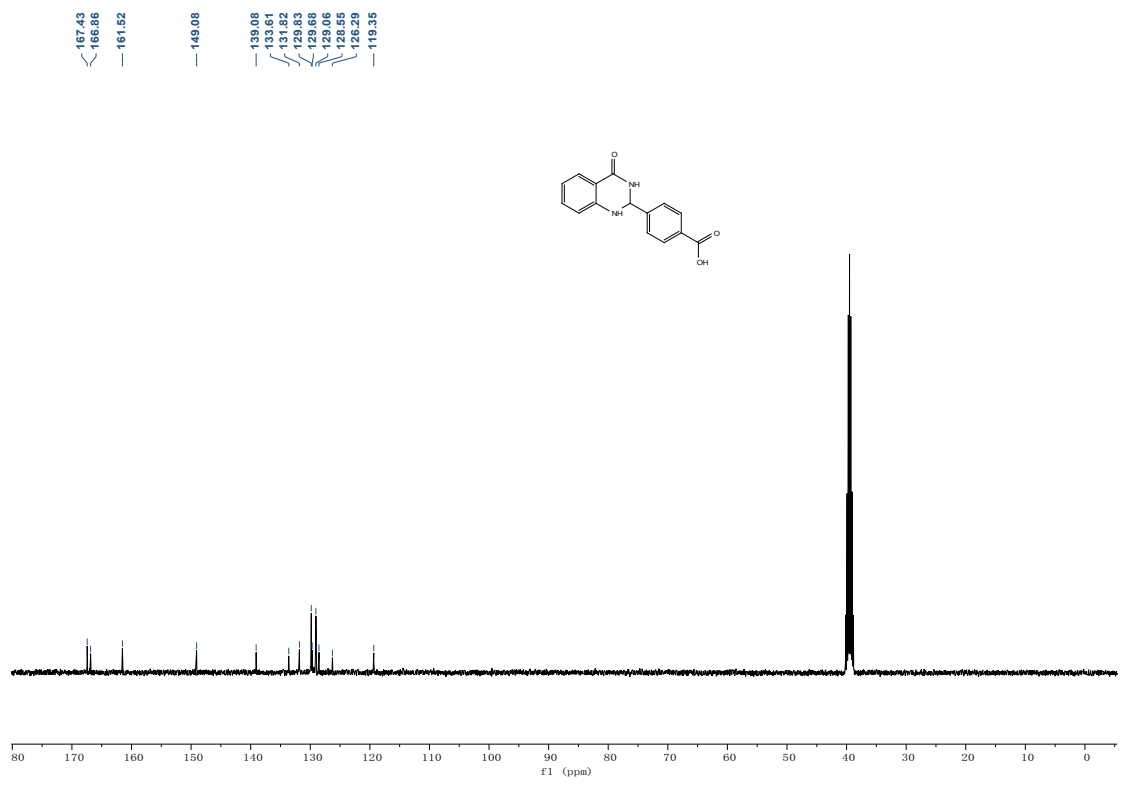

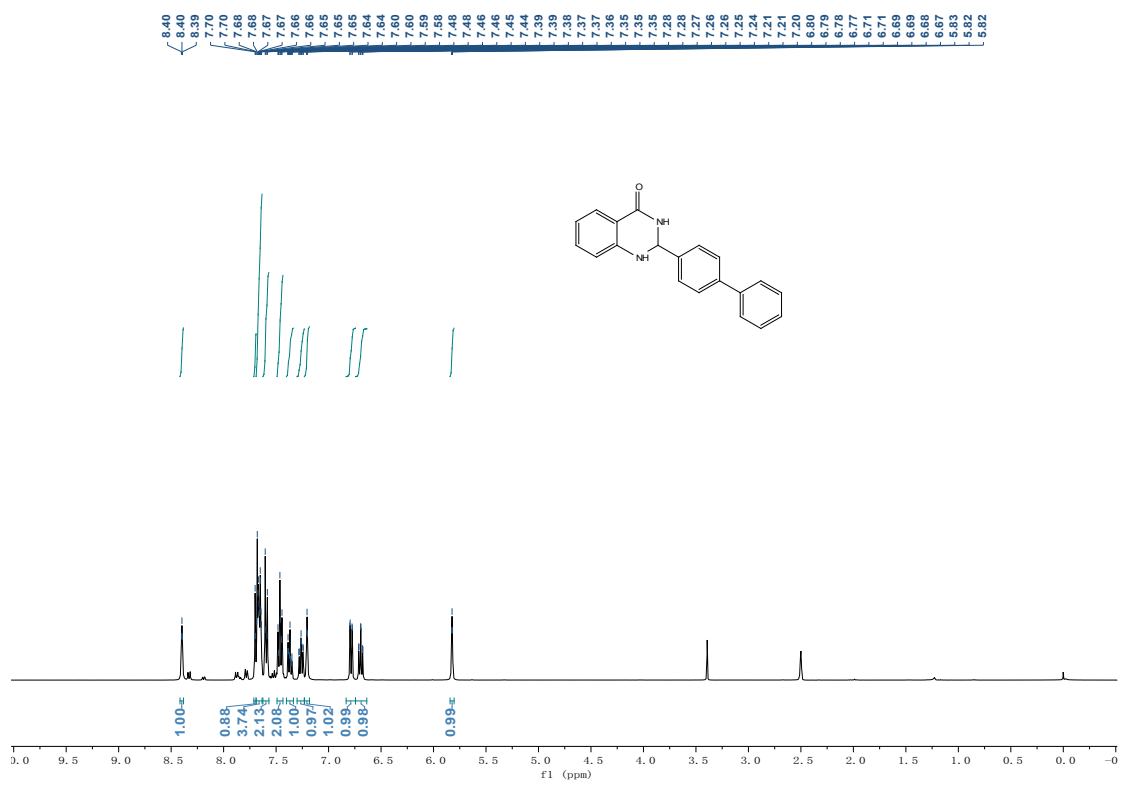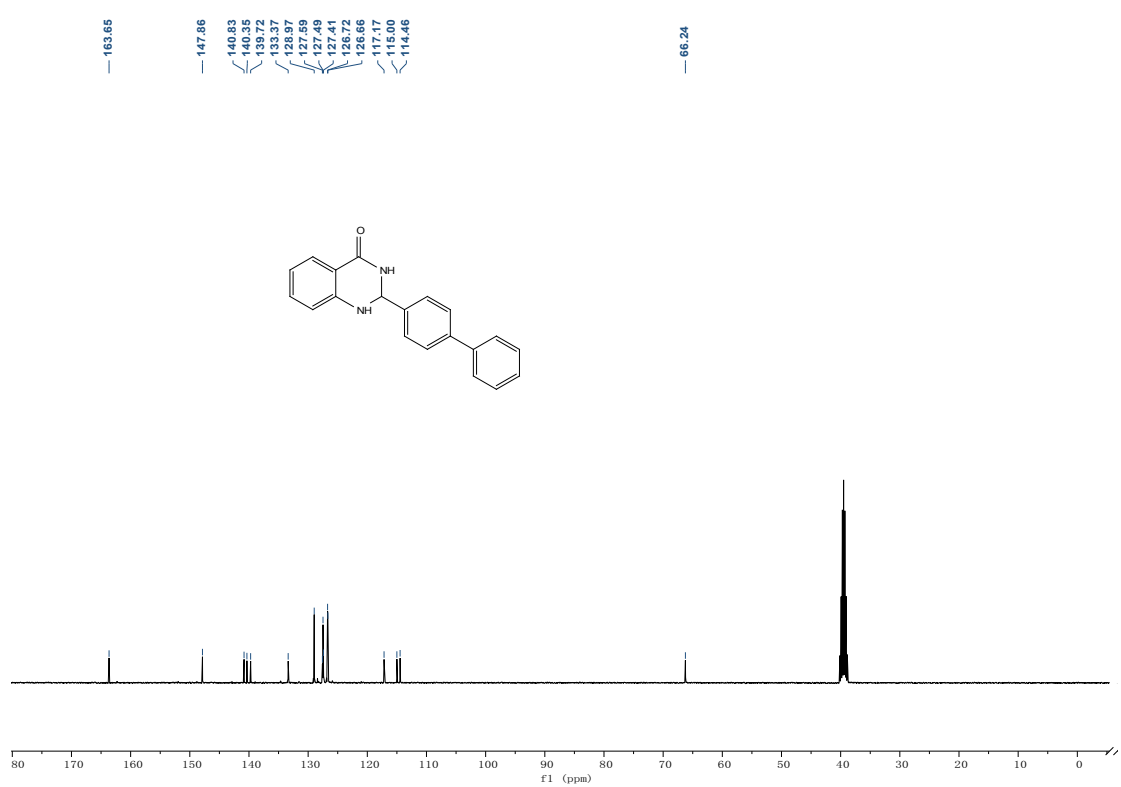

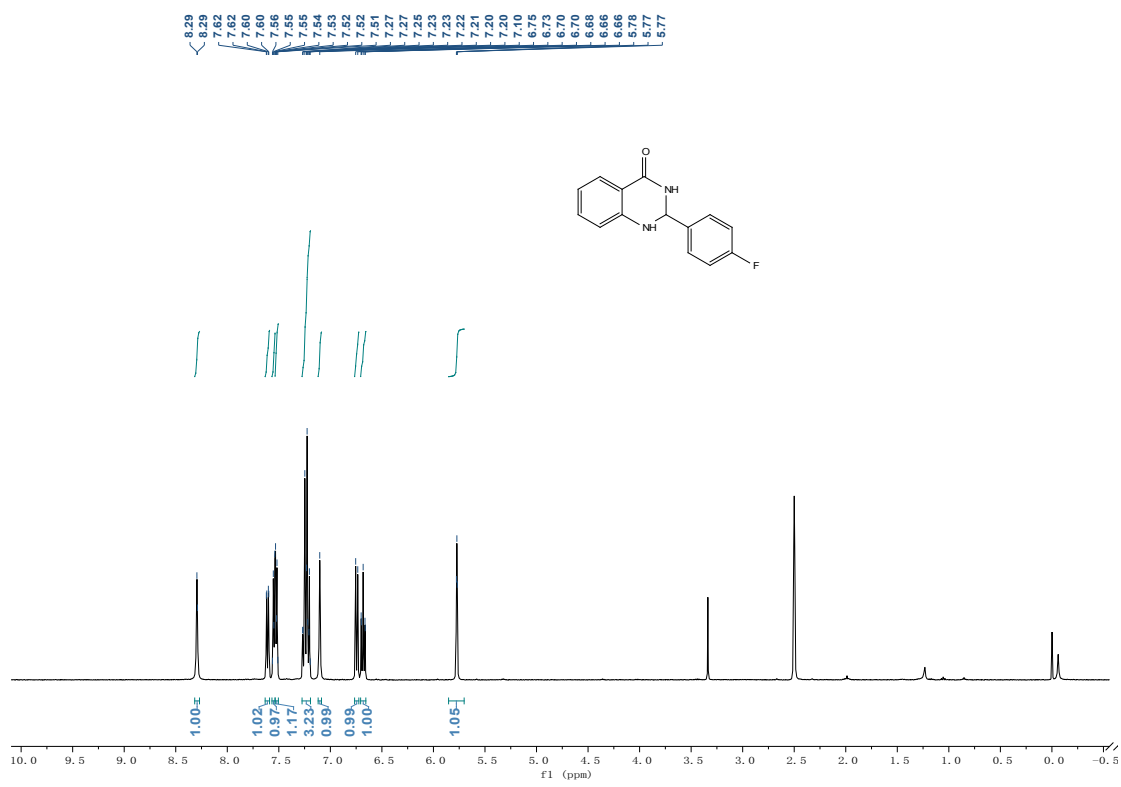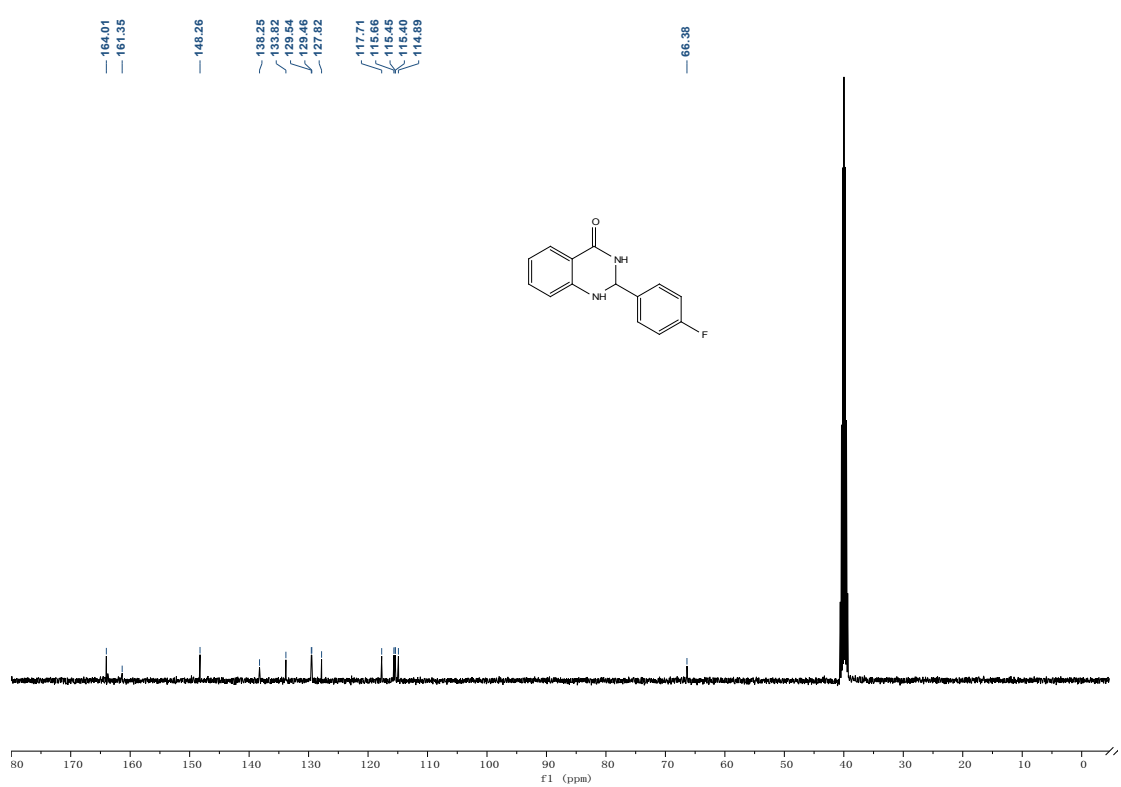



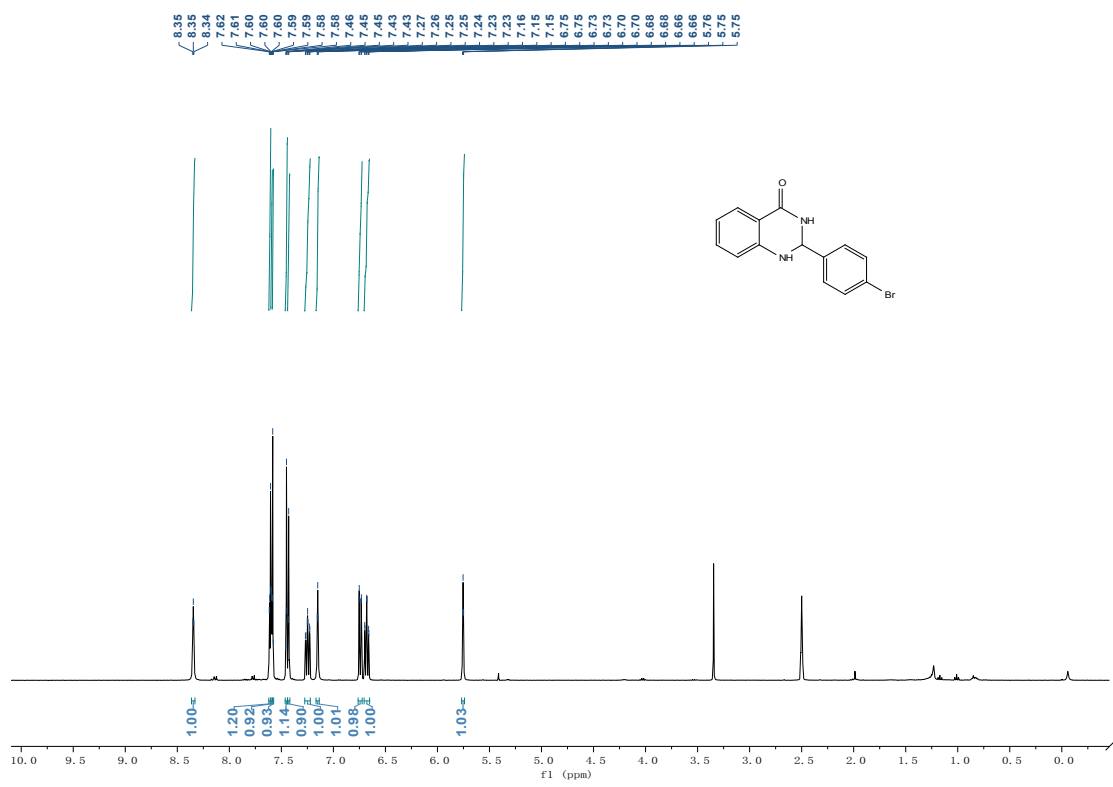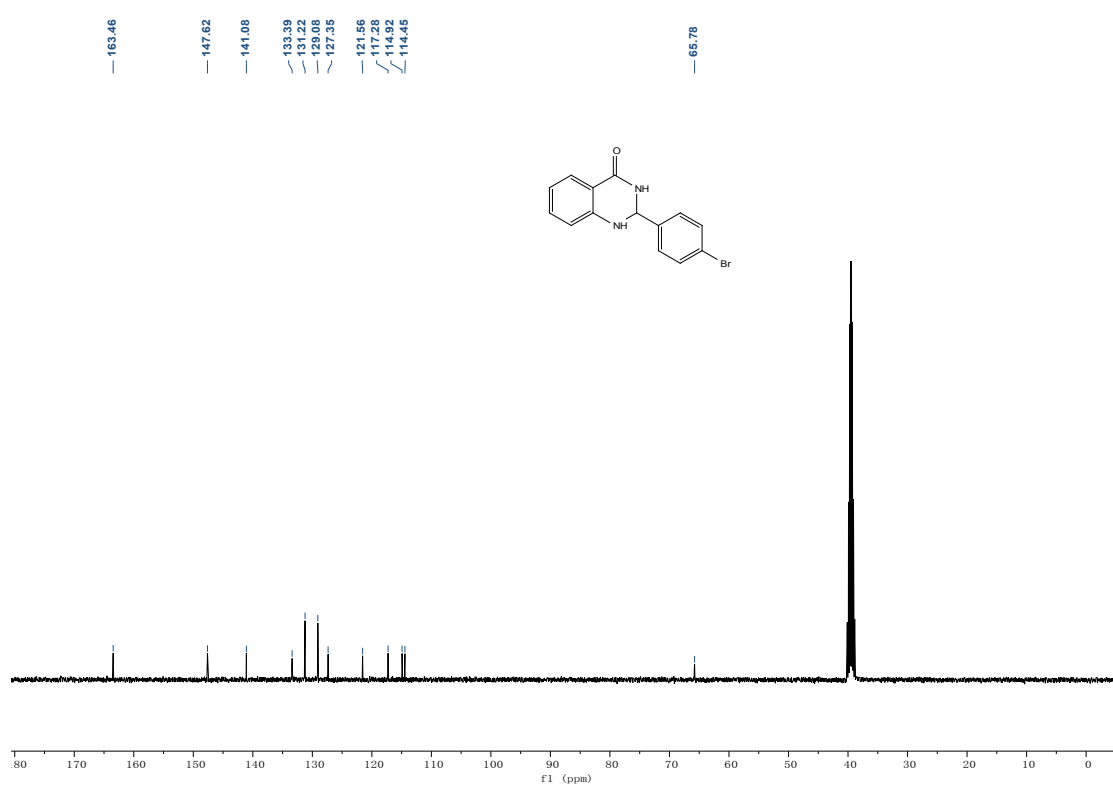

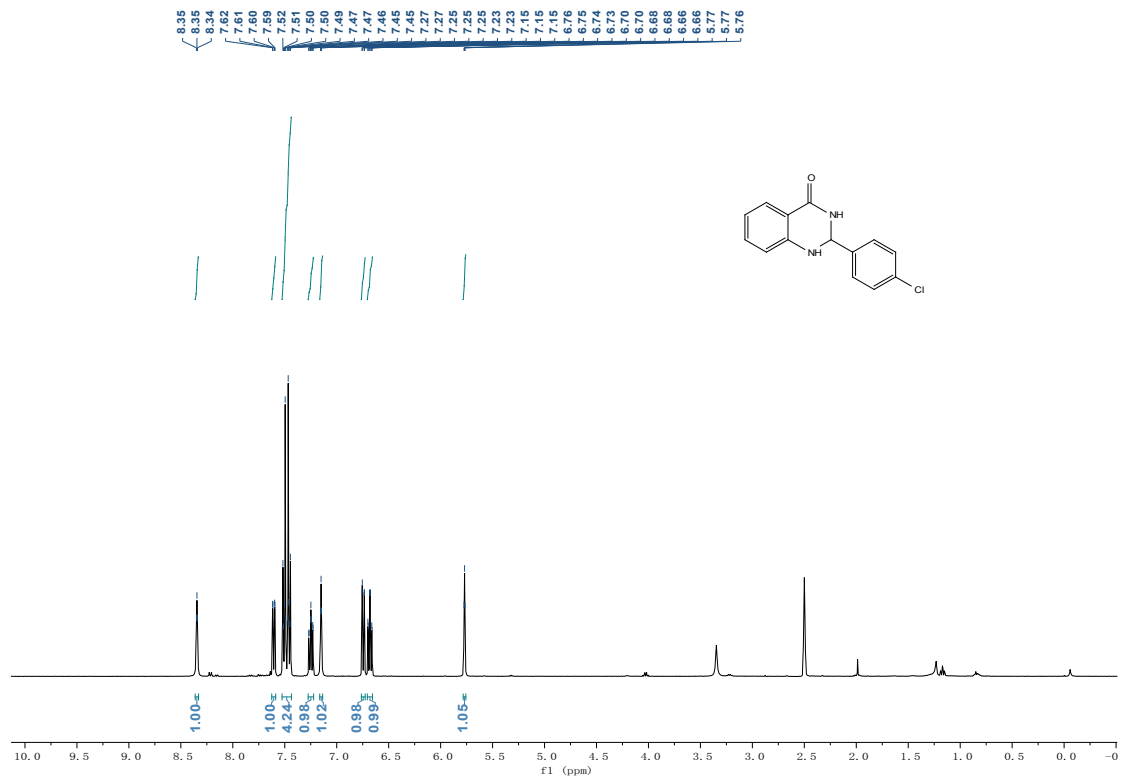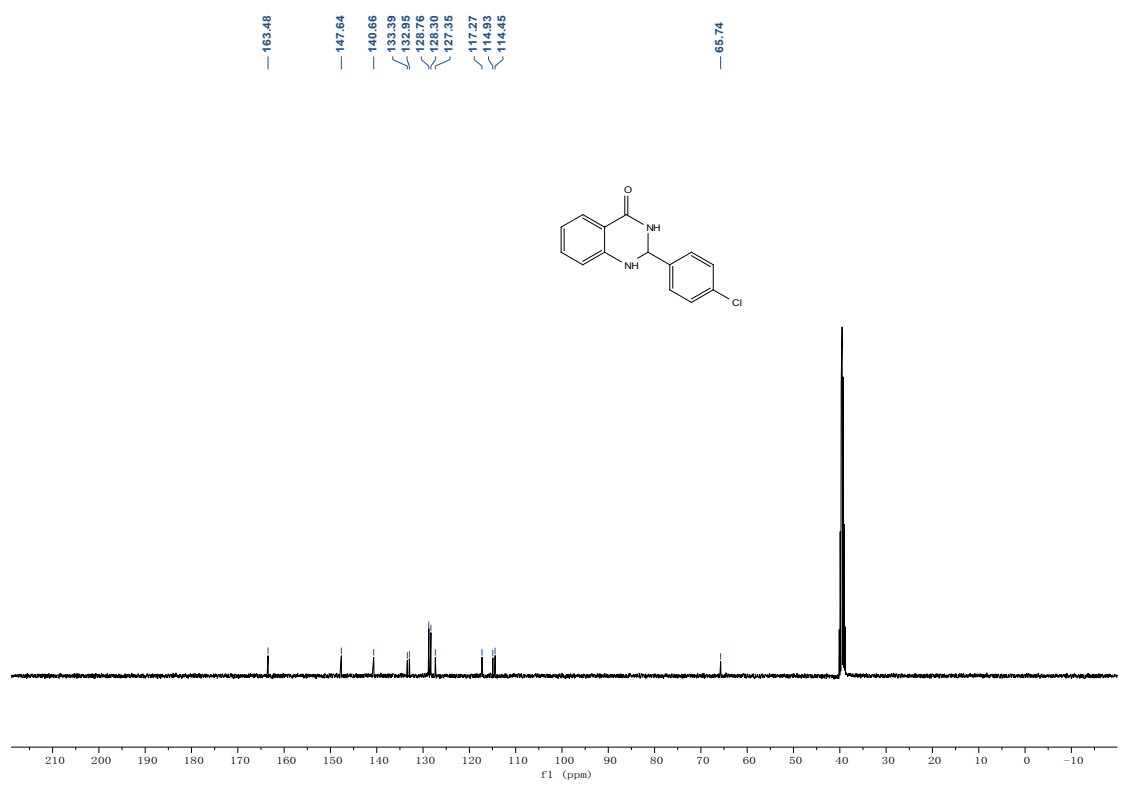

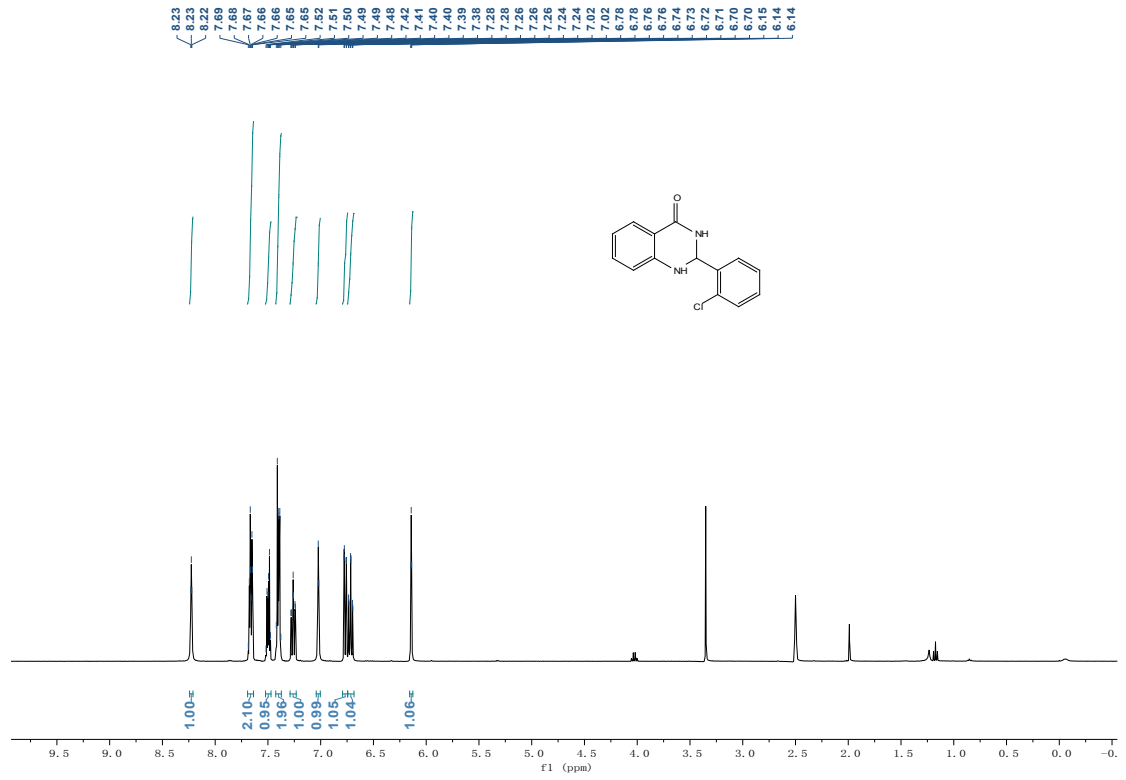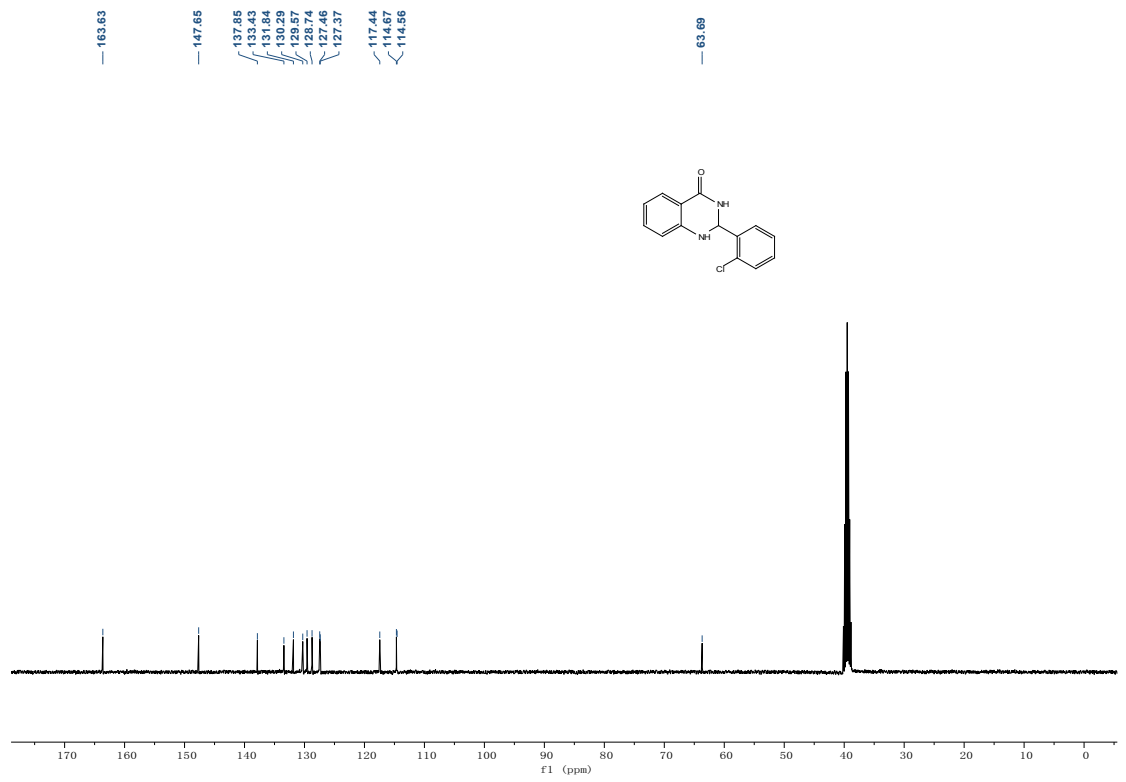

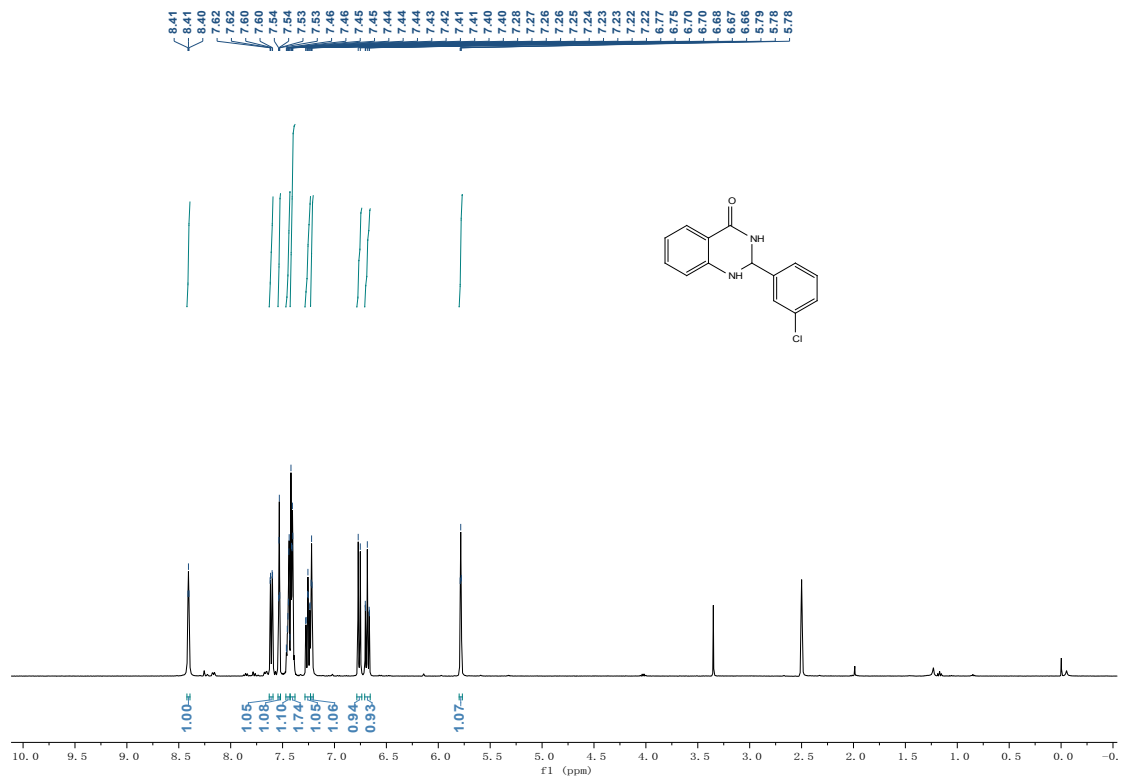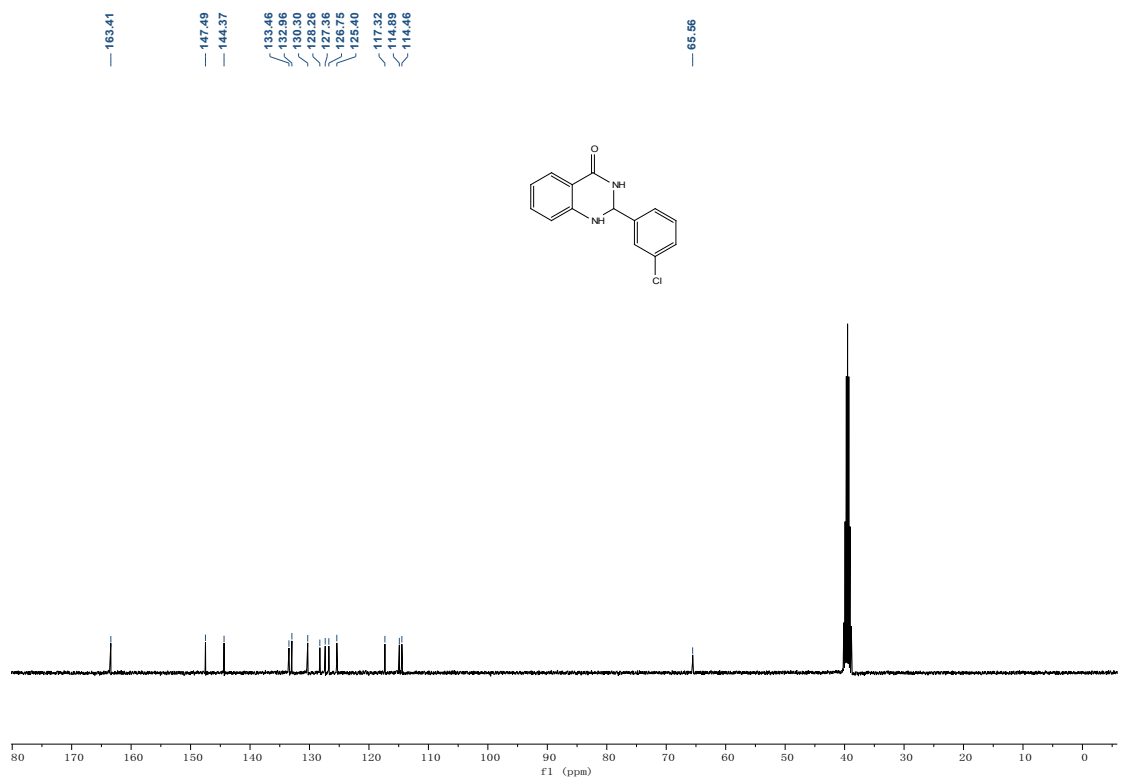

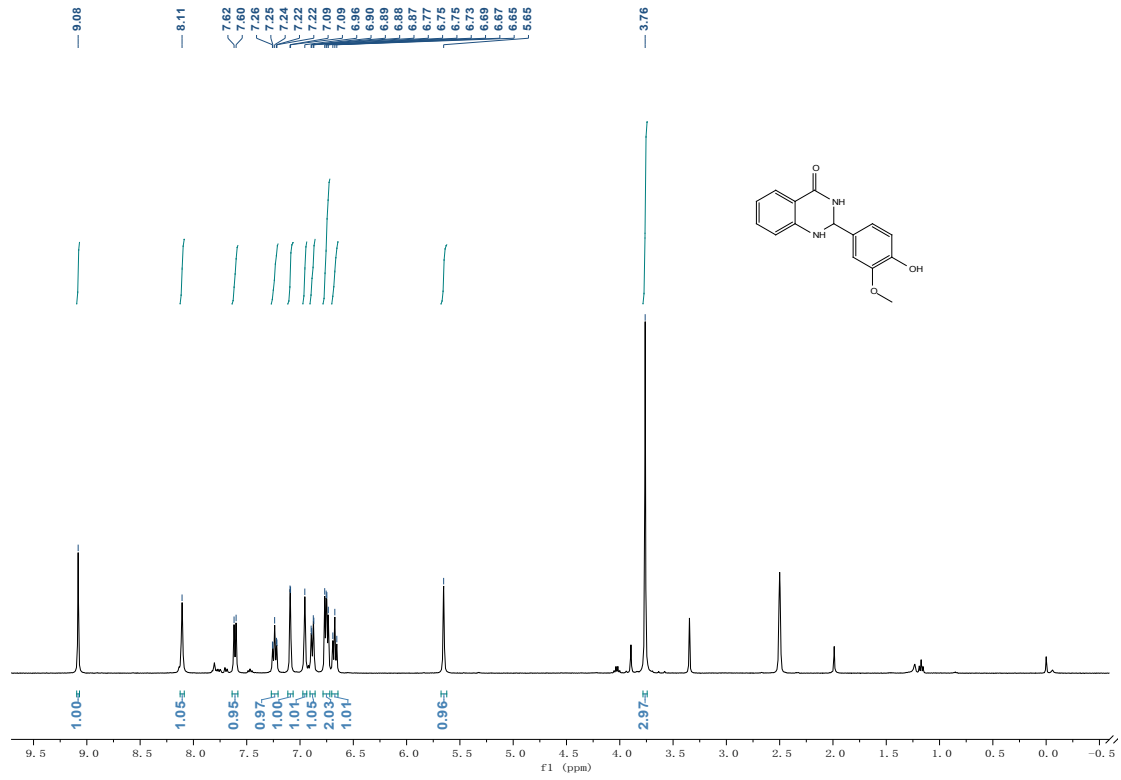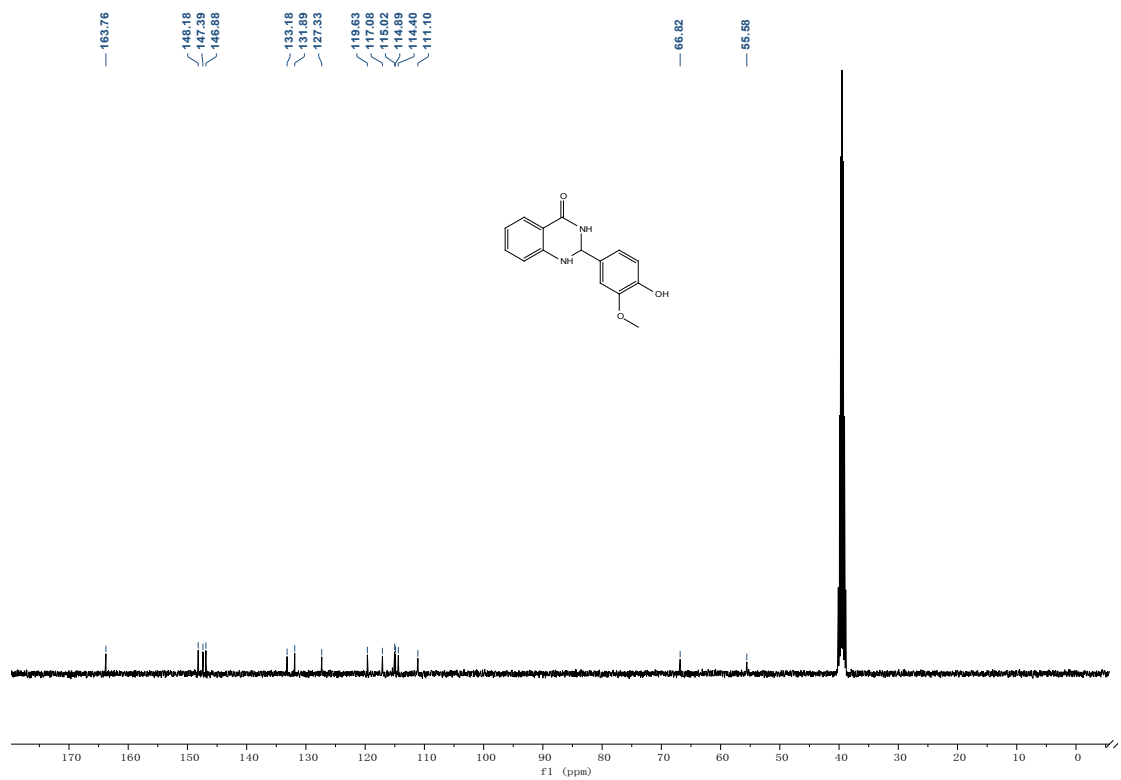

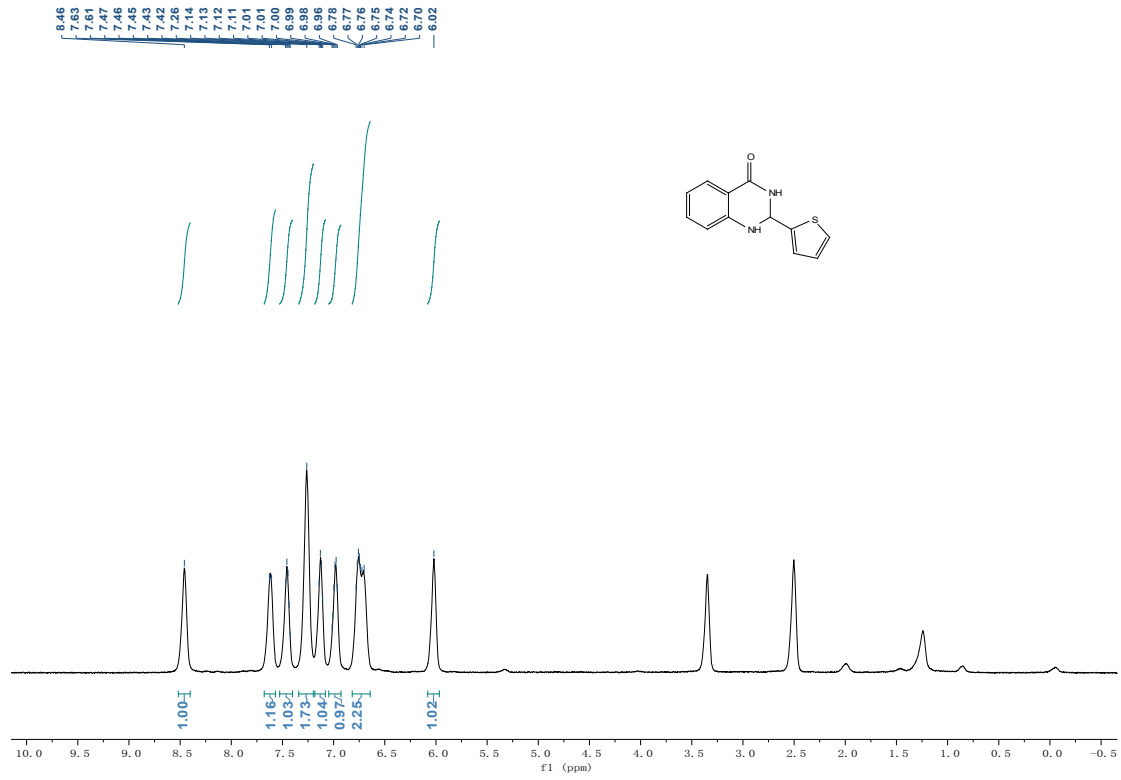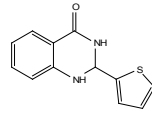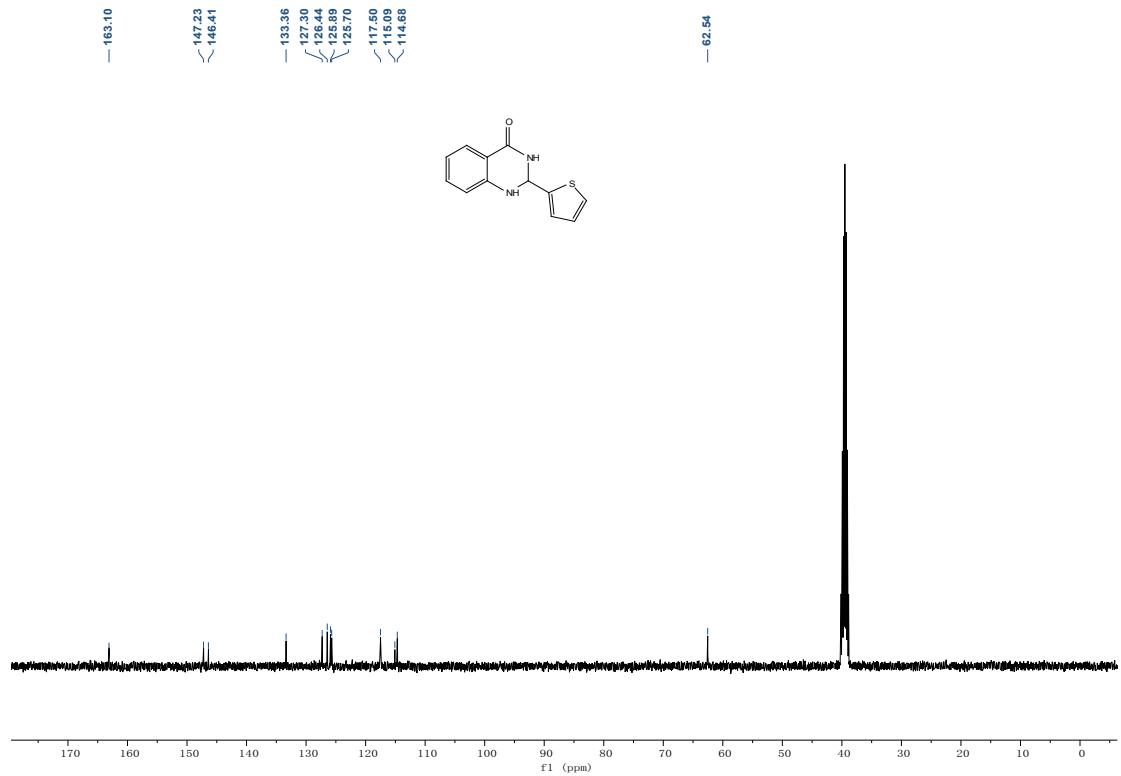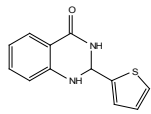



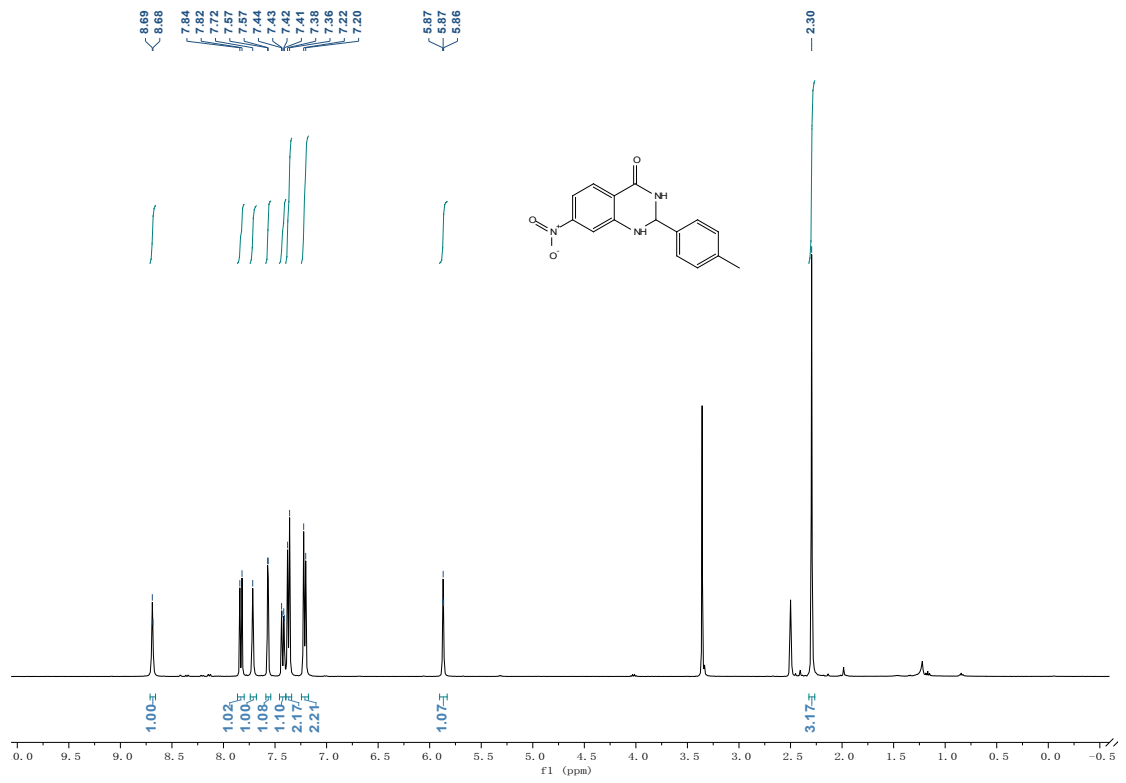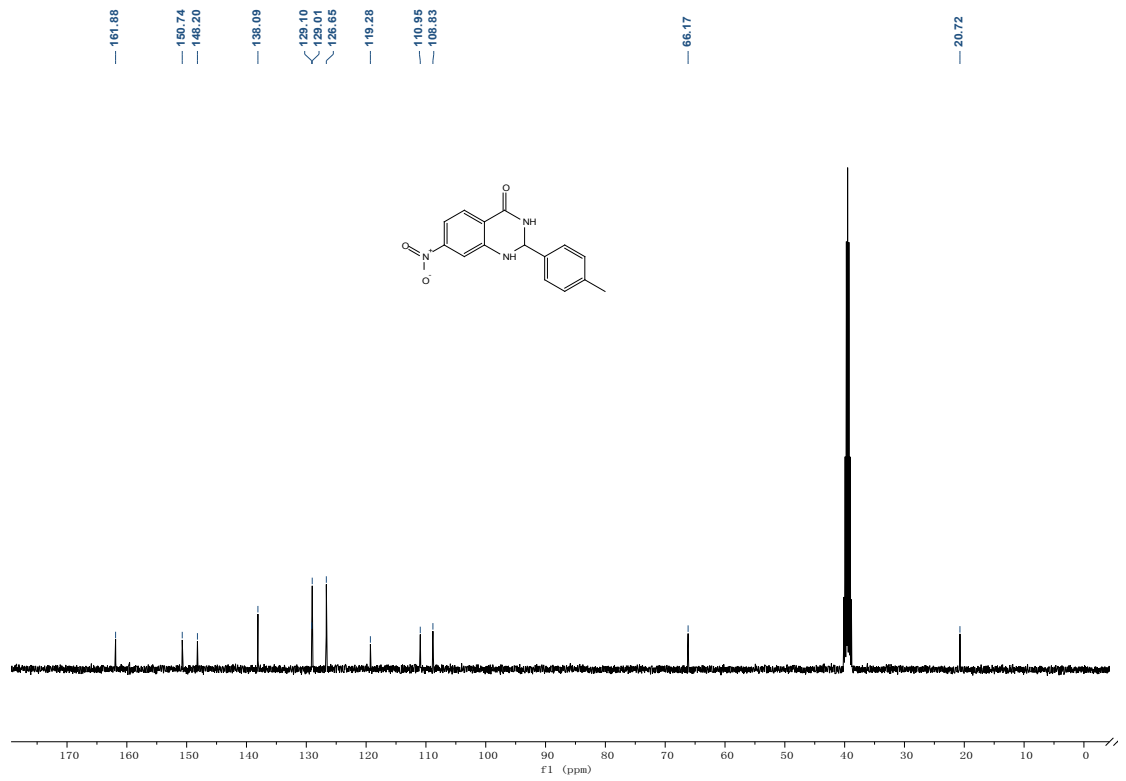



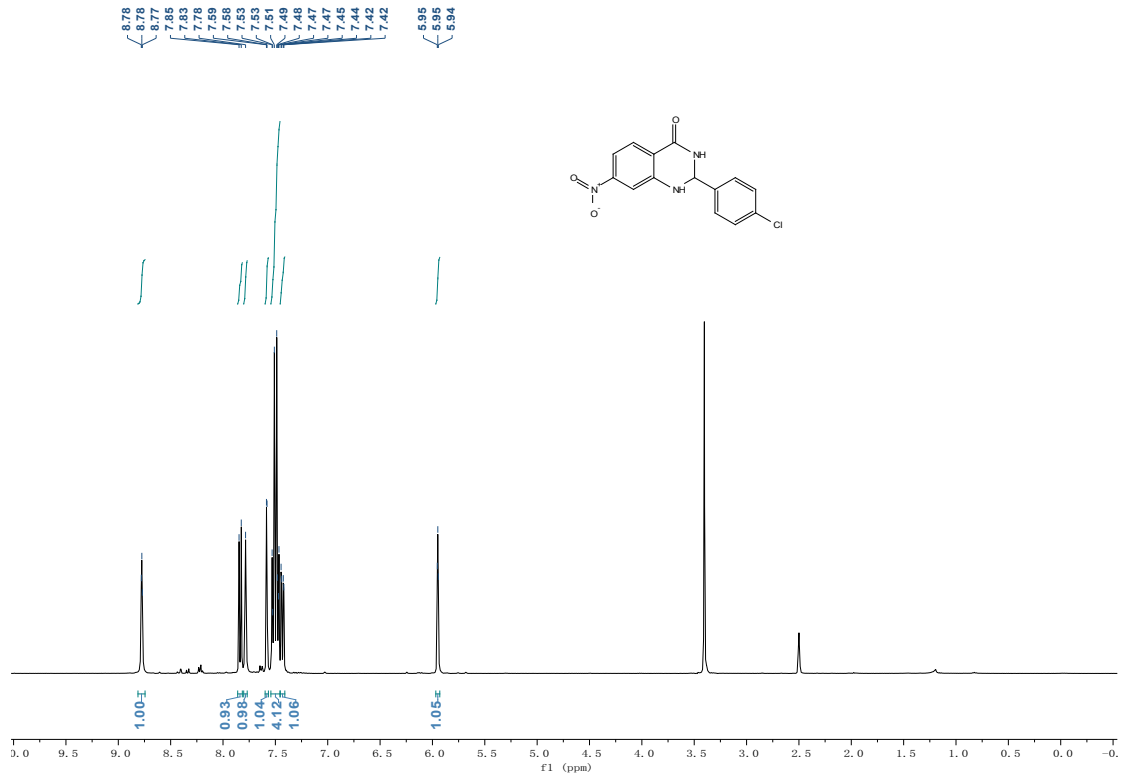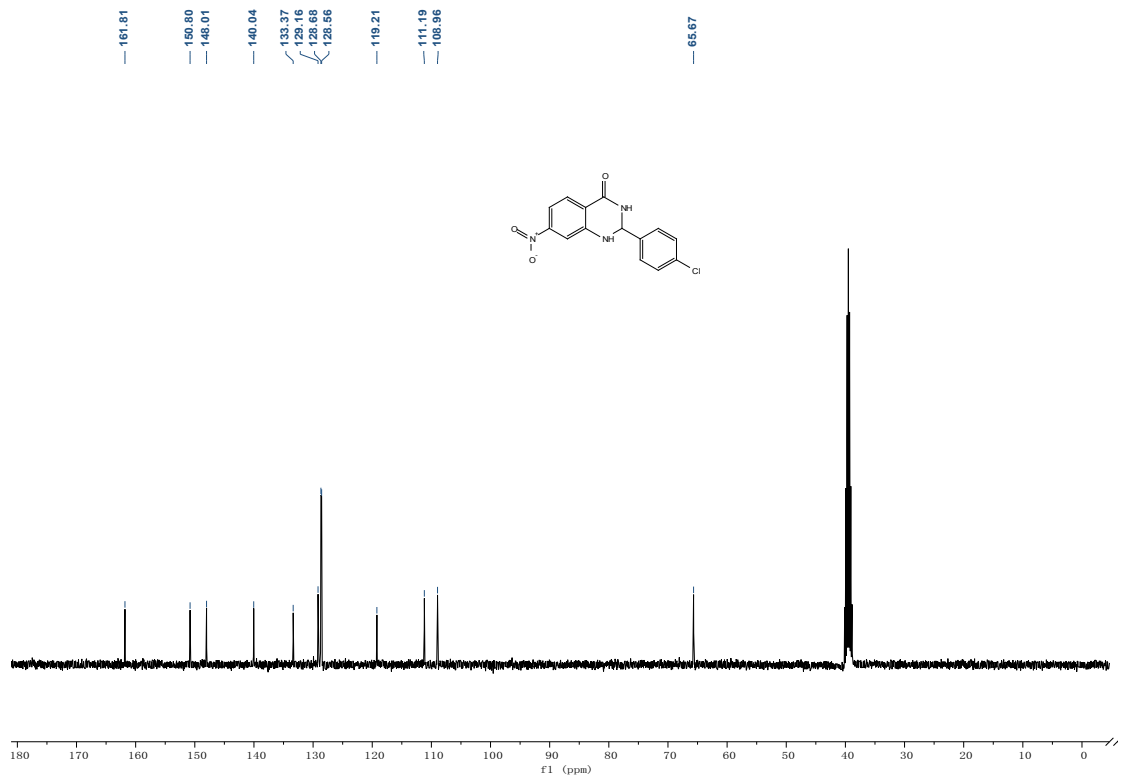

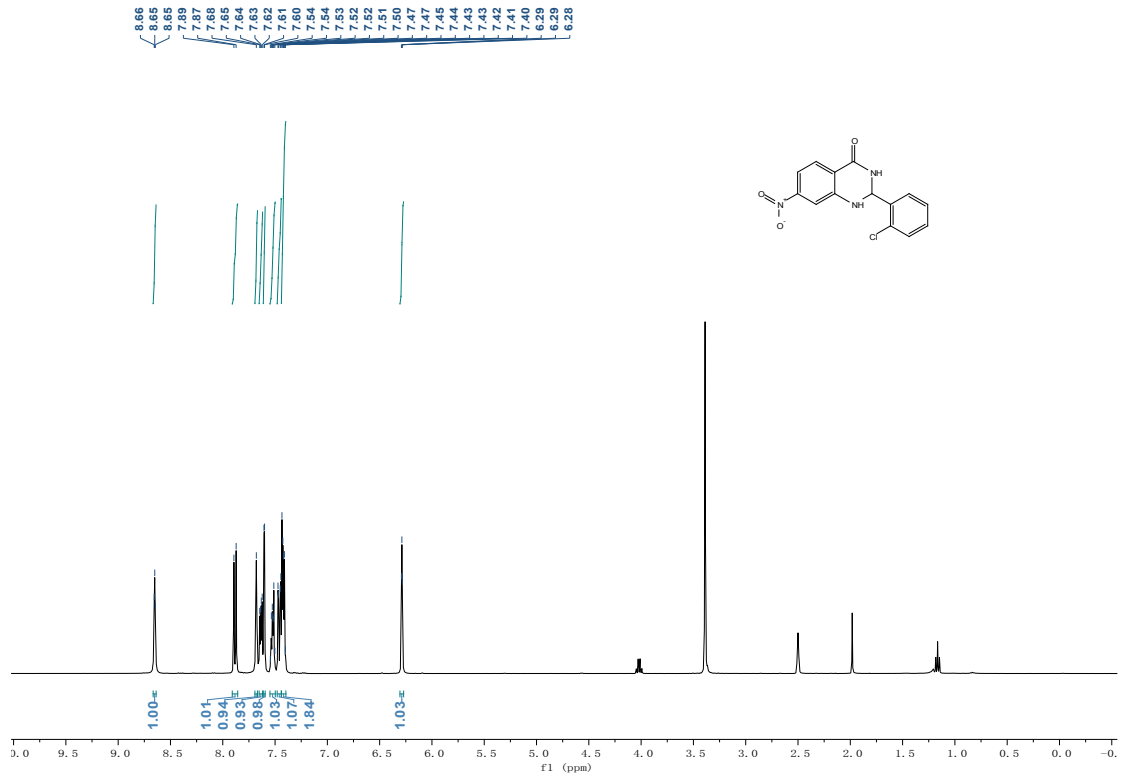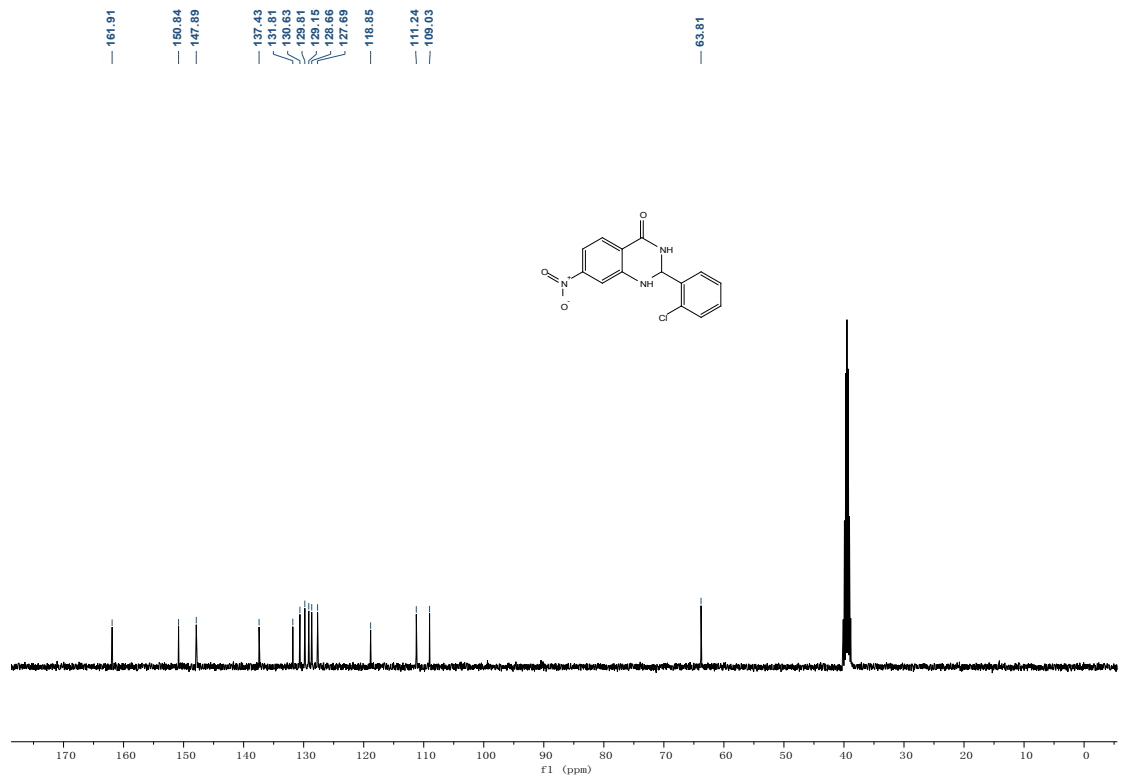

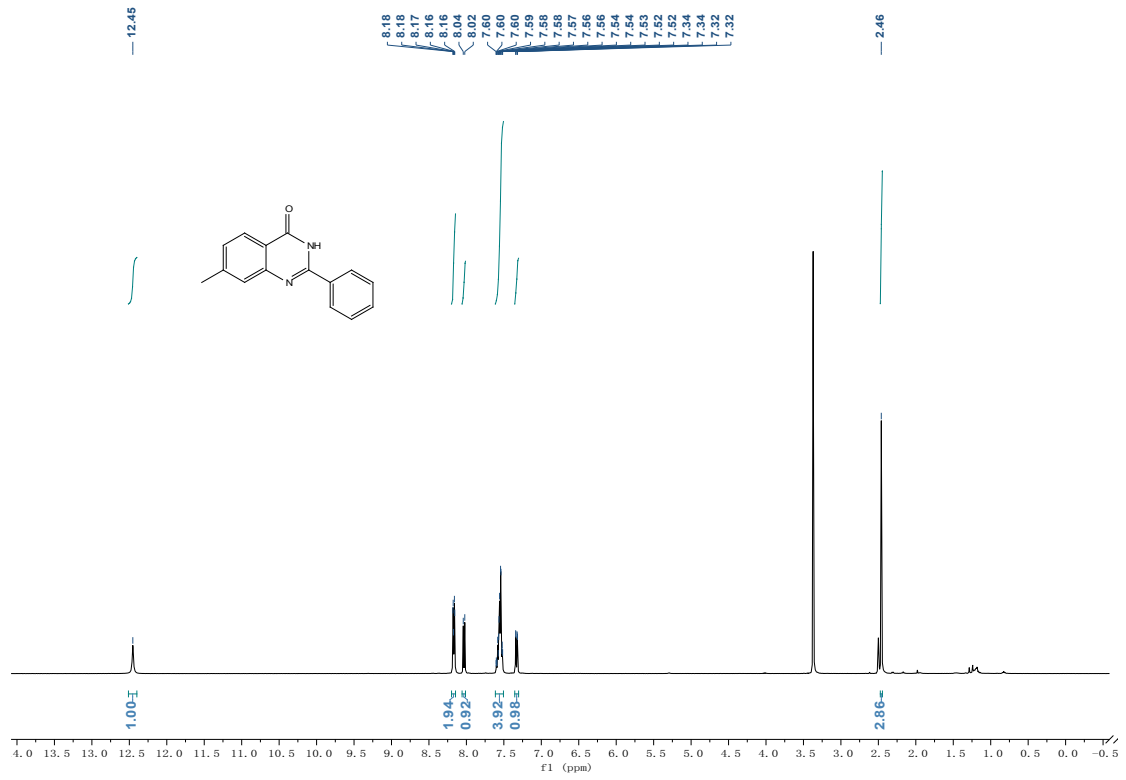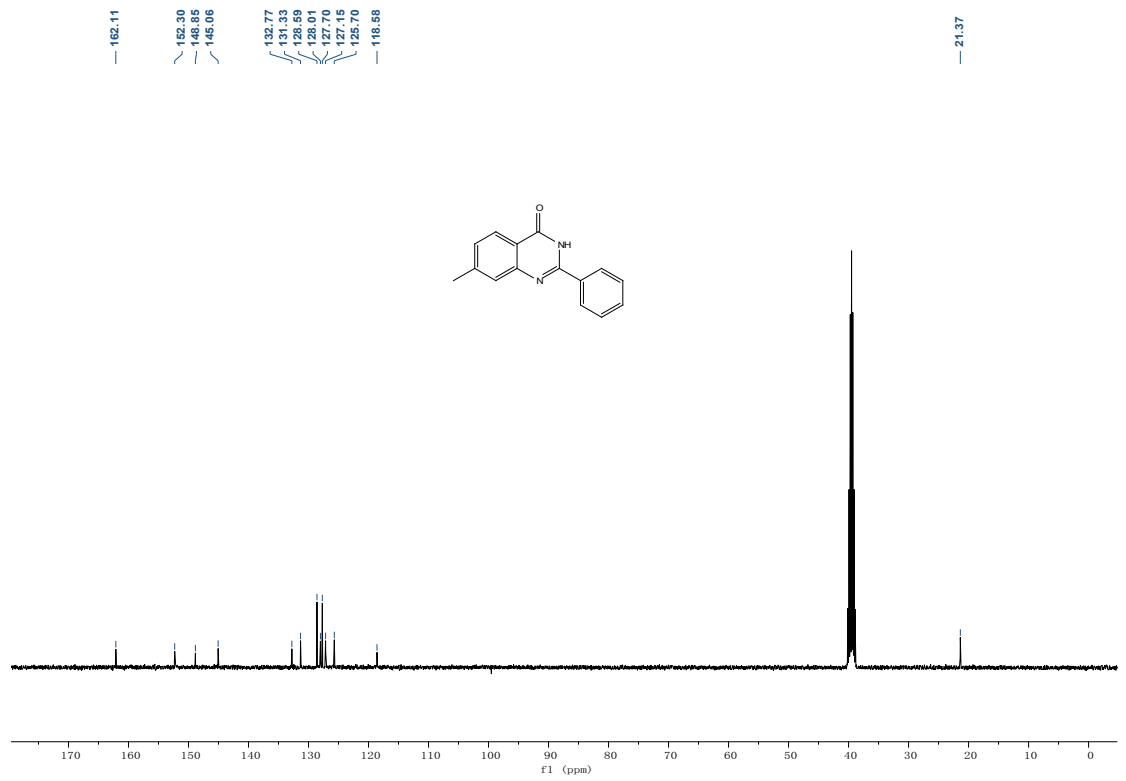

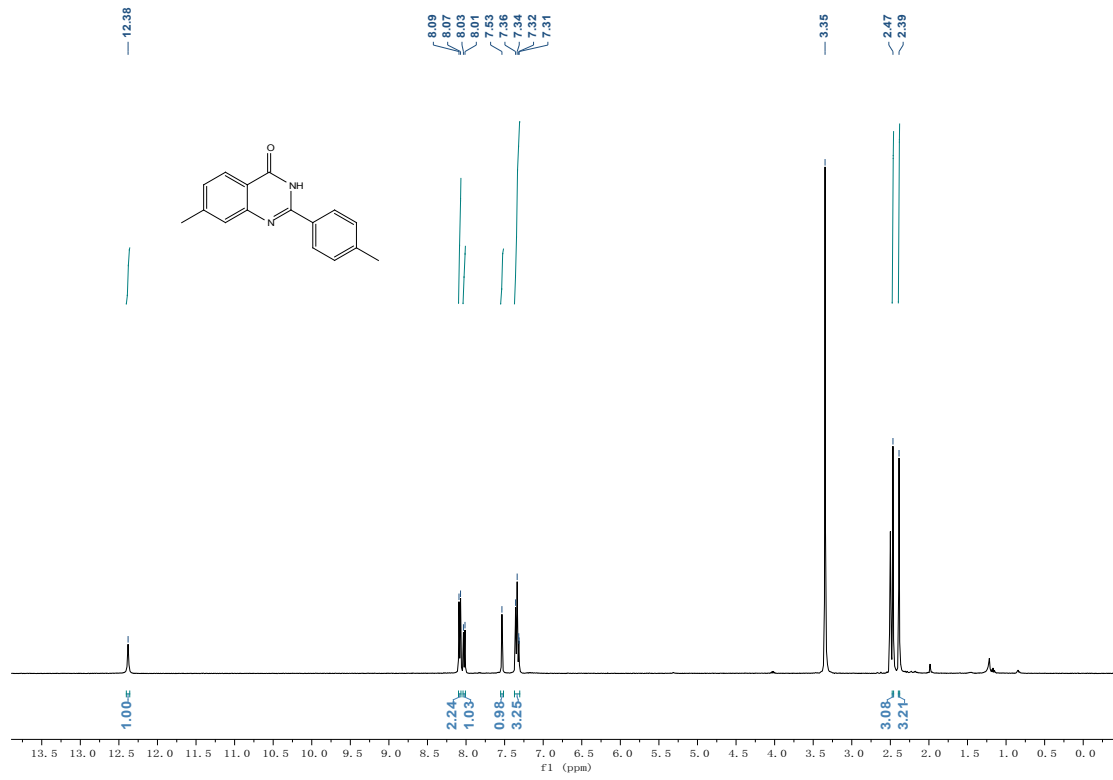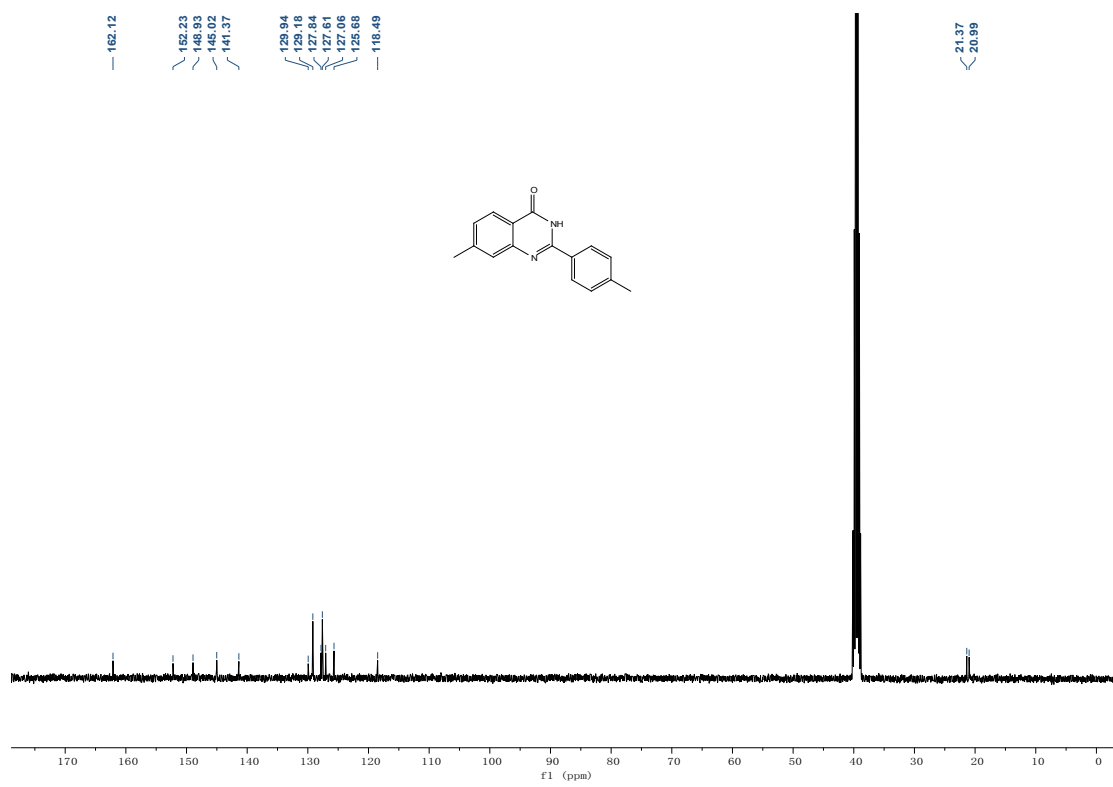

# $^1\text{H-NMR}$ and $^{13}\text{C-NMR}$ spectrum of compound 5a-5p

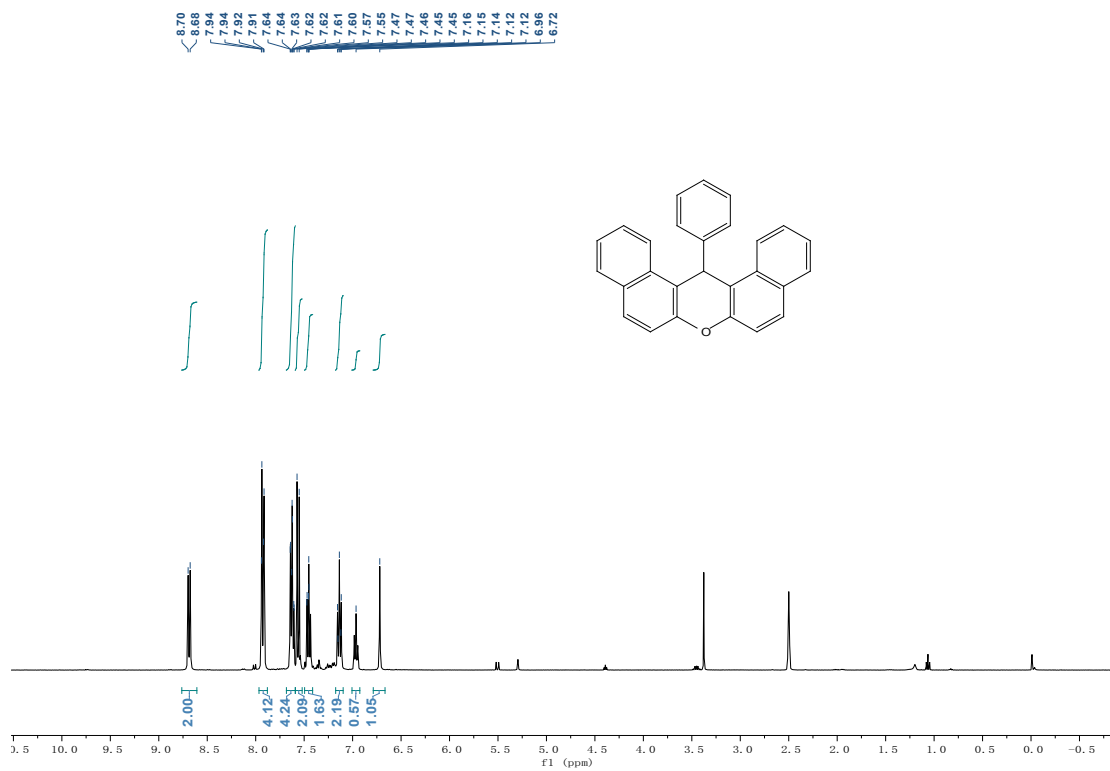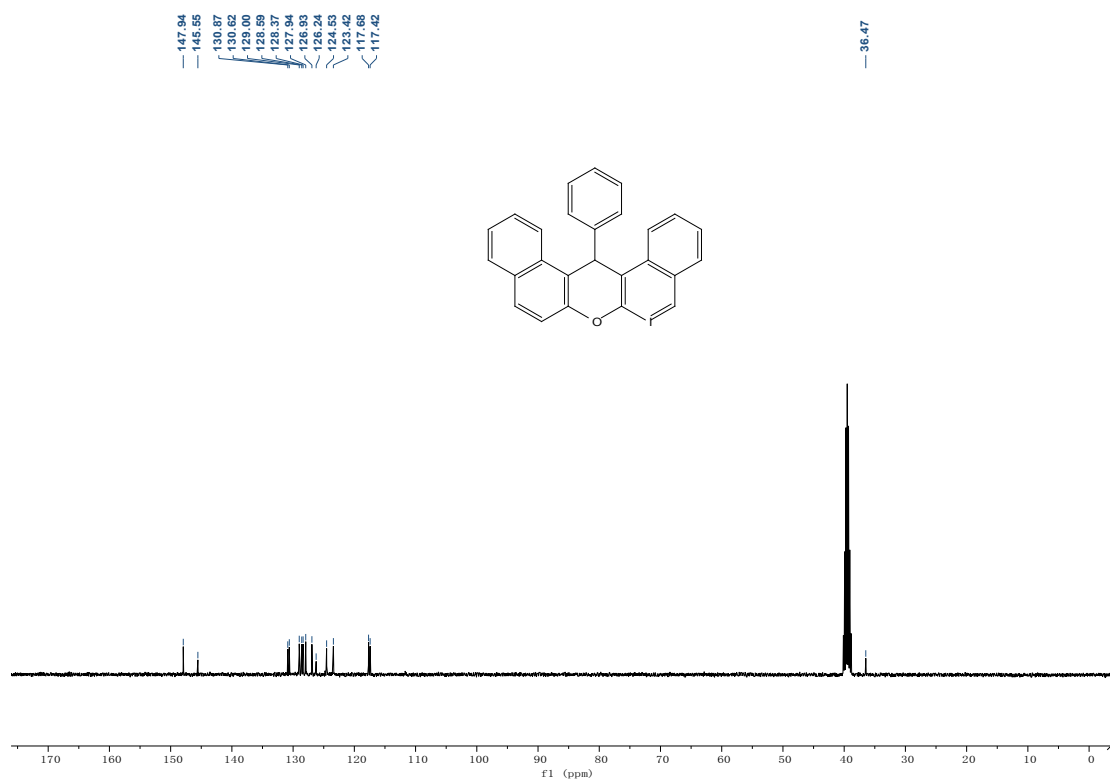

8.70  
8.68  
7.97  
7.85  
7.81  
7.91  
7.88  
7.66  
7.64  
7.62  
7.59  
7.47  
7.45  
7.43  
6.92

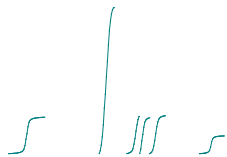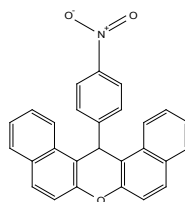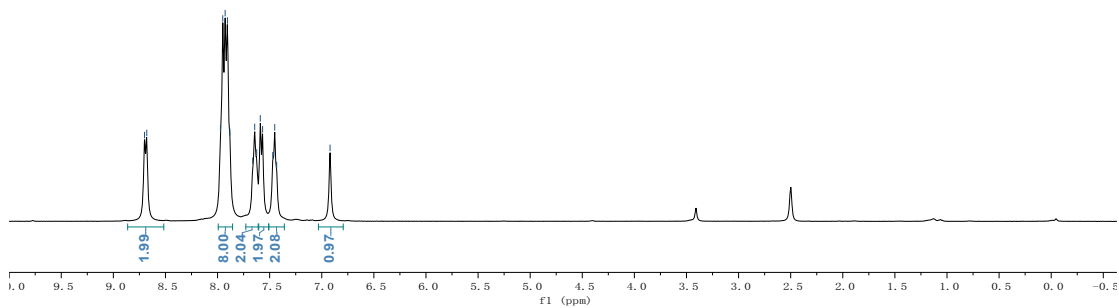

152.64  
147.98  
145.77  
130.73  
130.63  
129.58  
129.03  
128.69  
127.20  
126.72  
125.67  
123.18  
117.75  
116.17

36.32

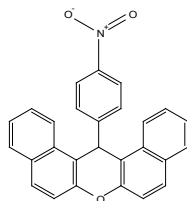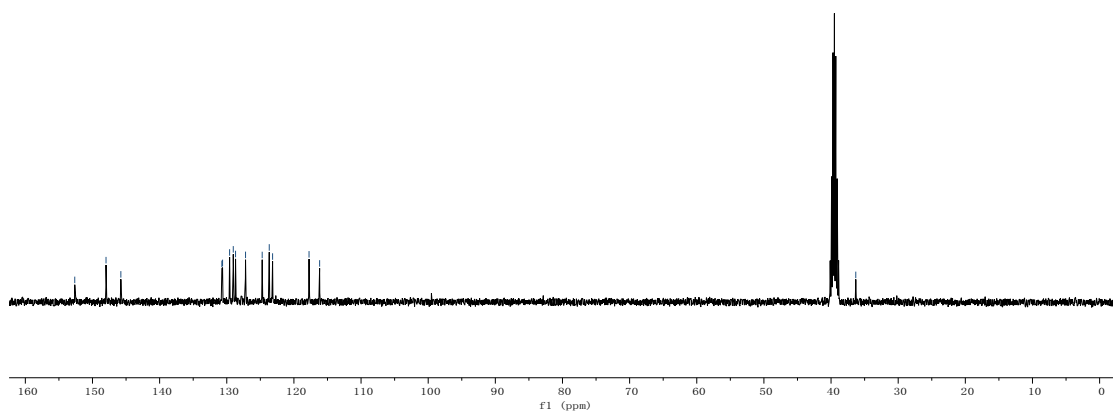

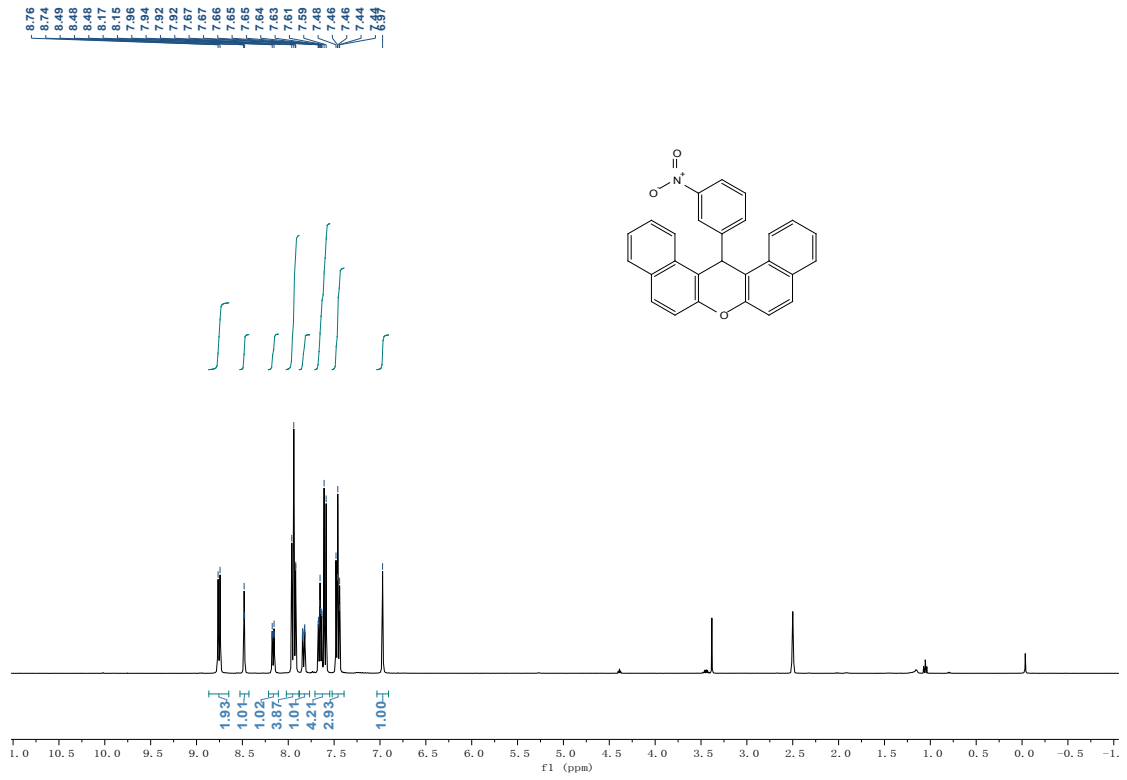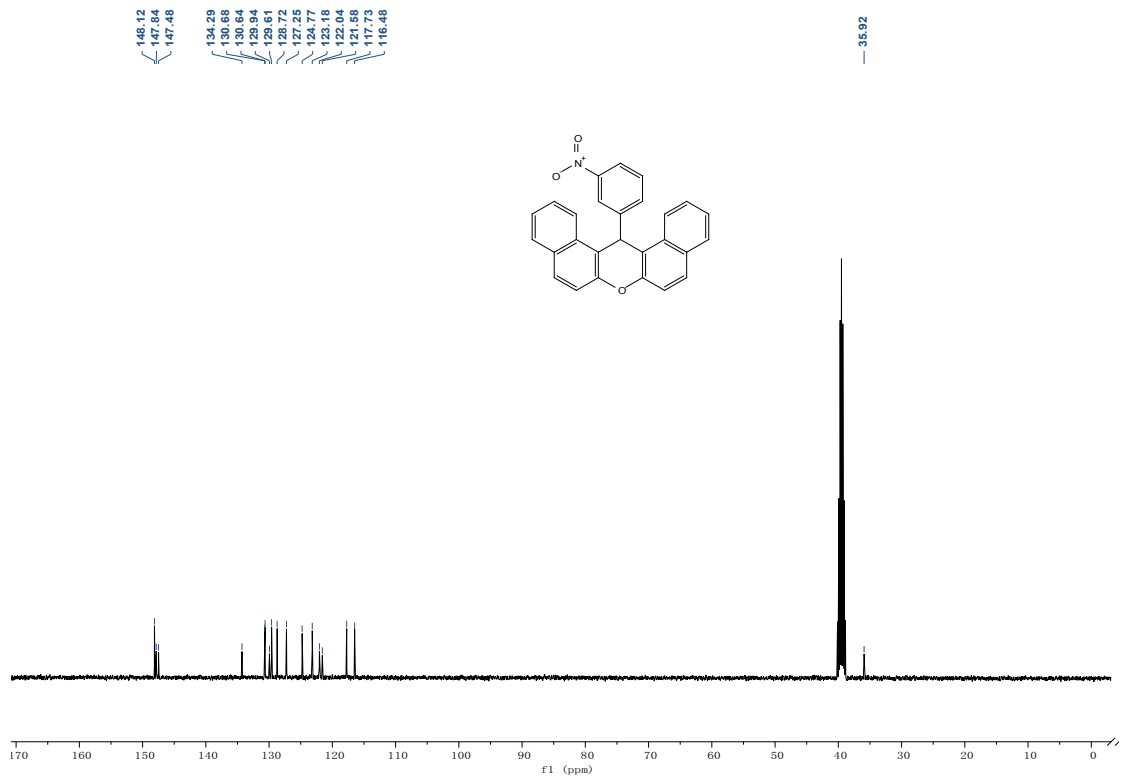

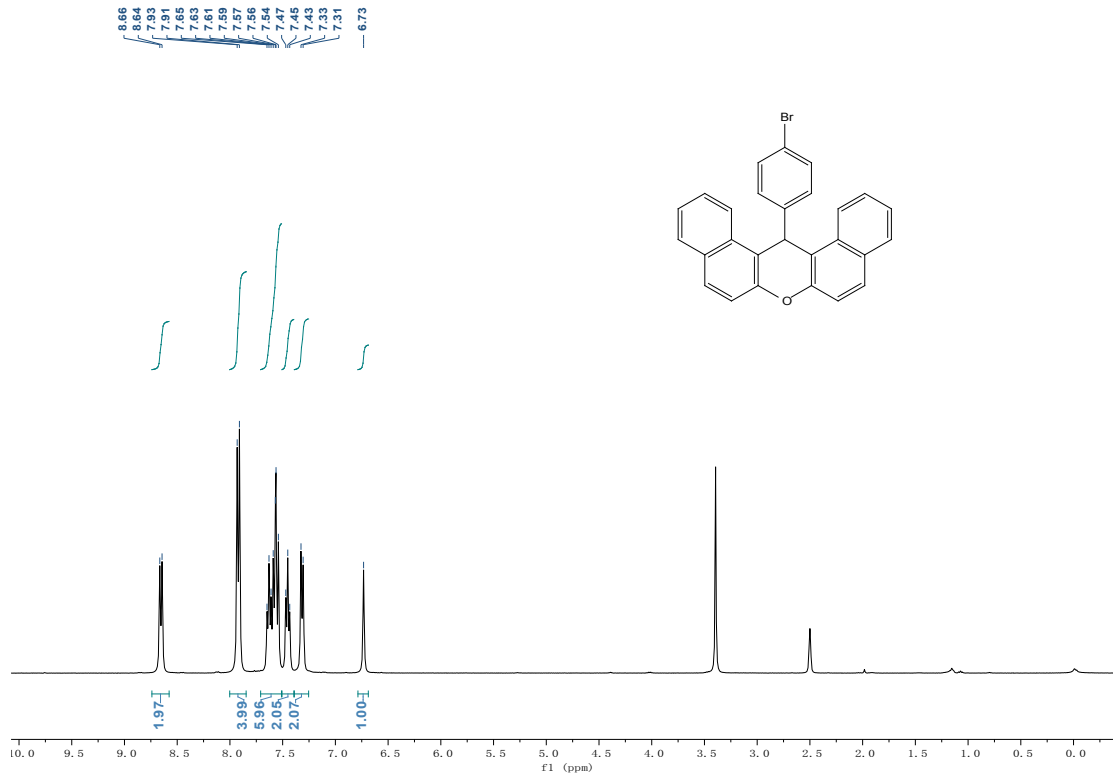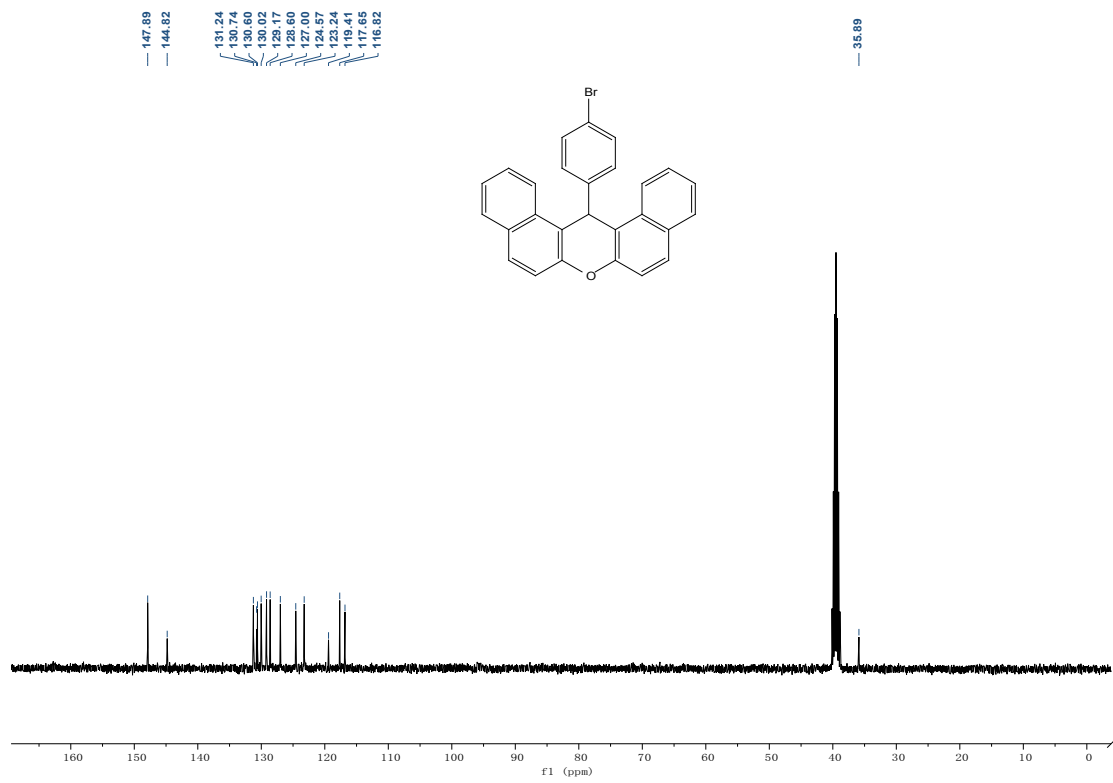



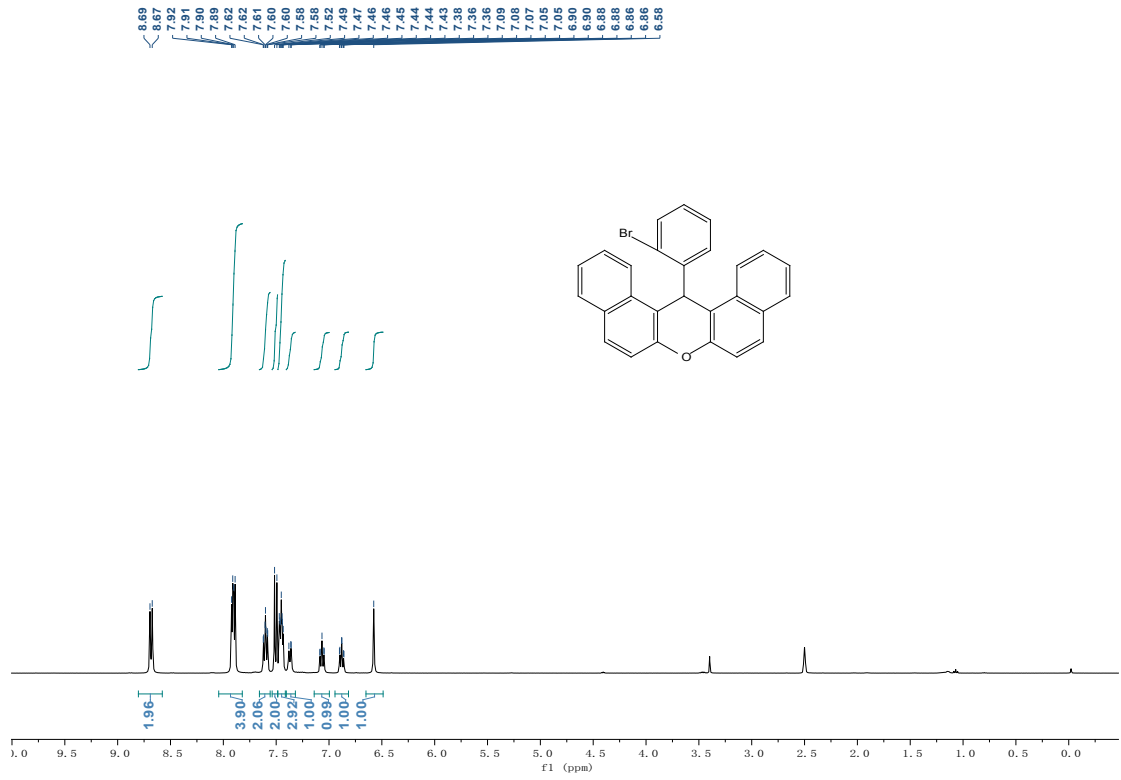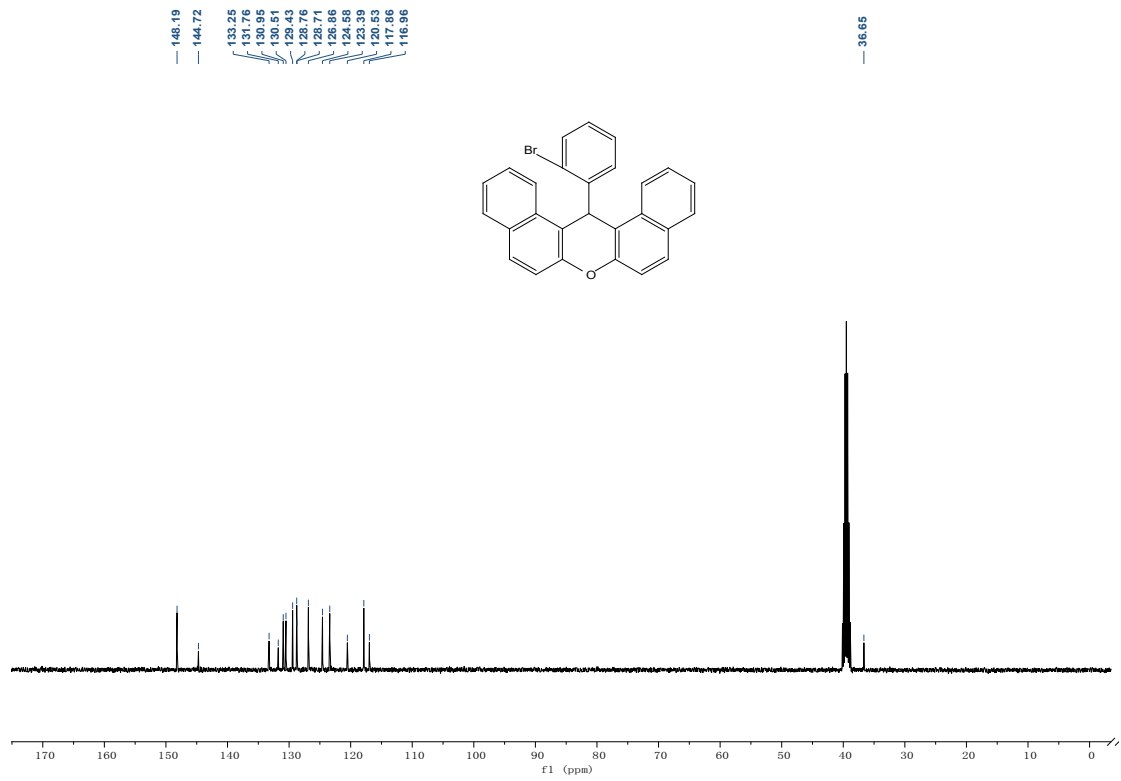

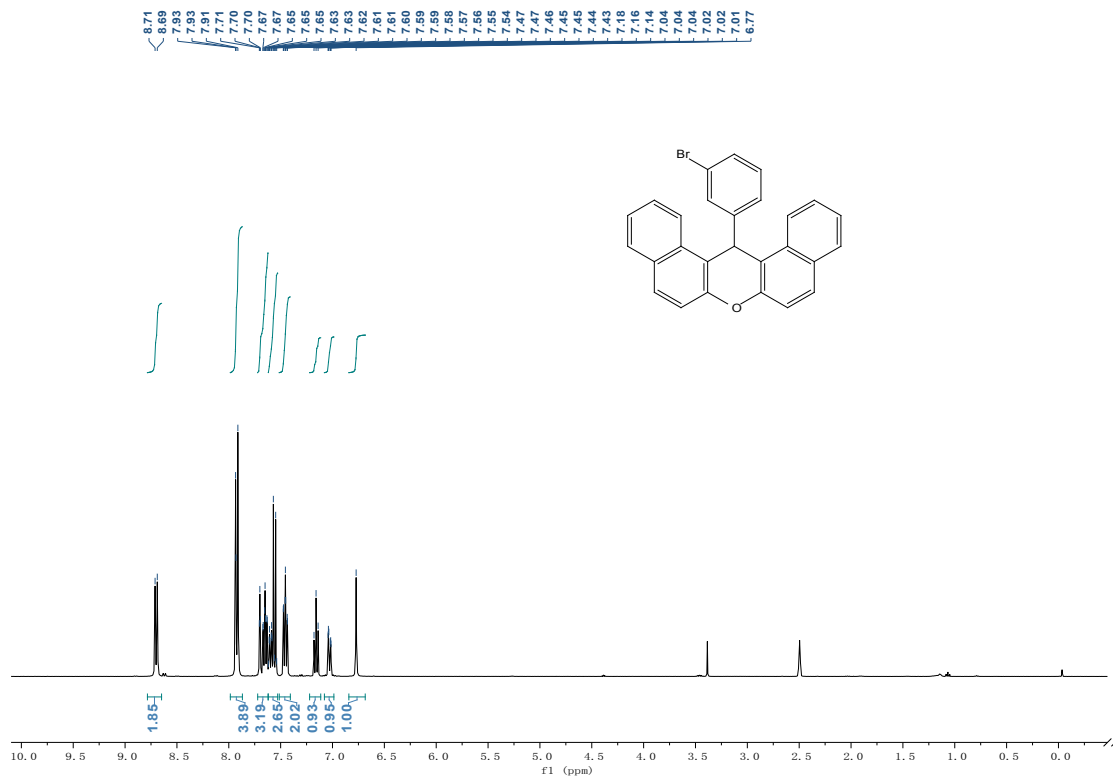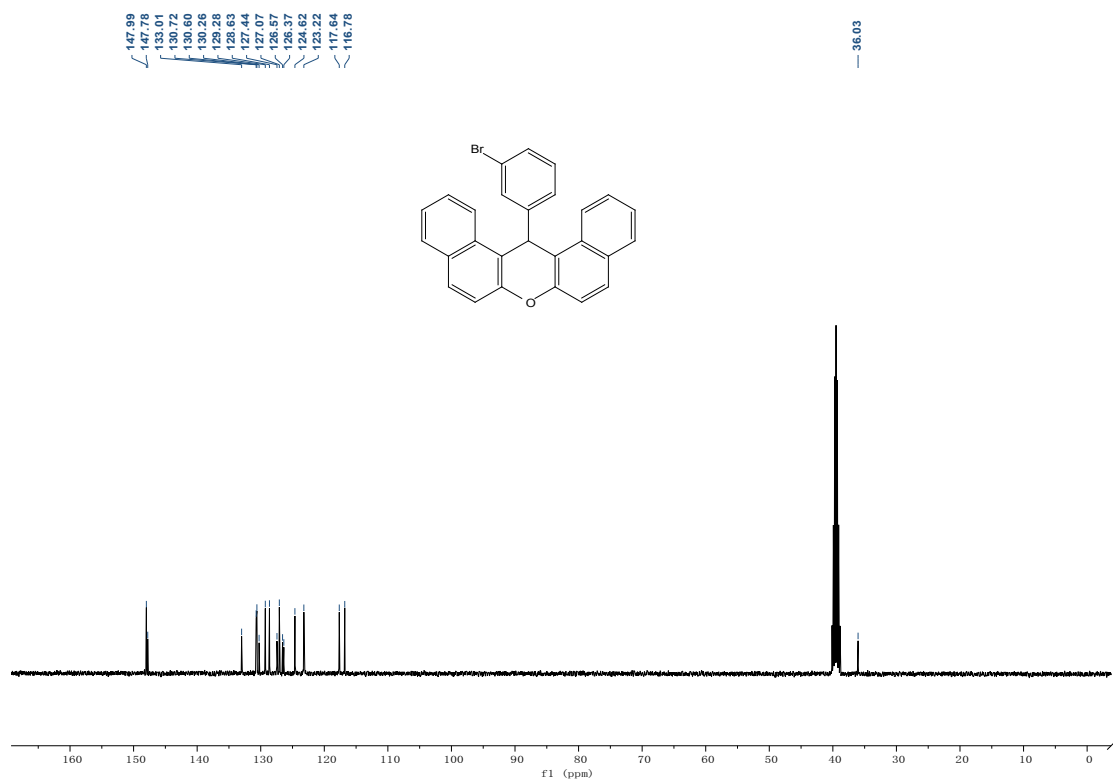



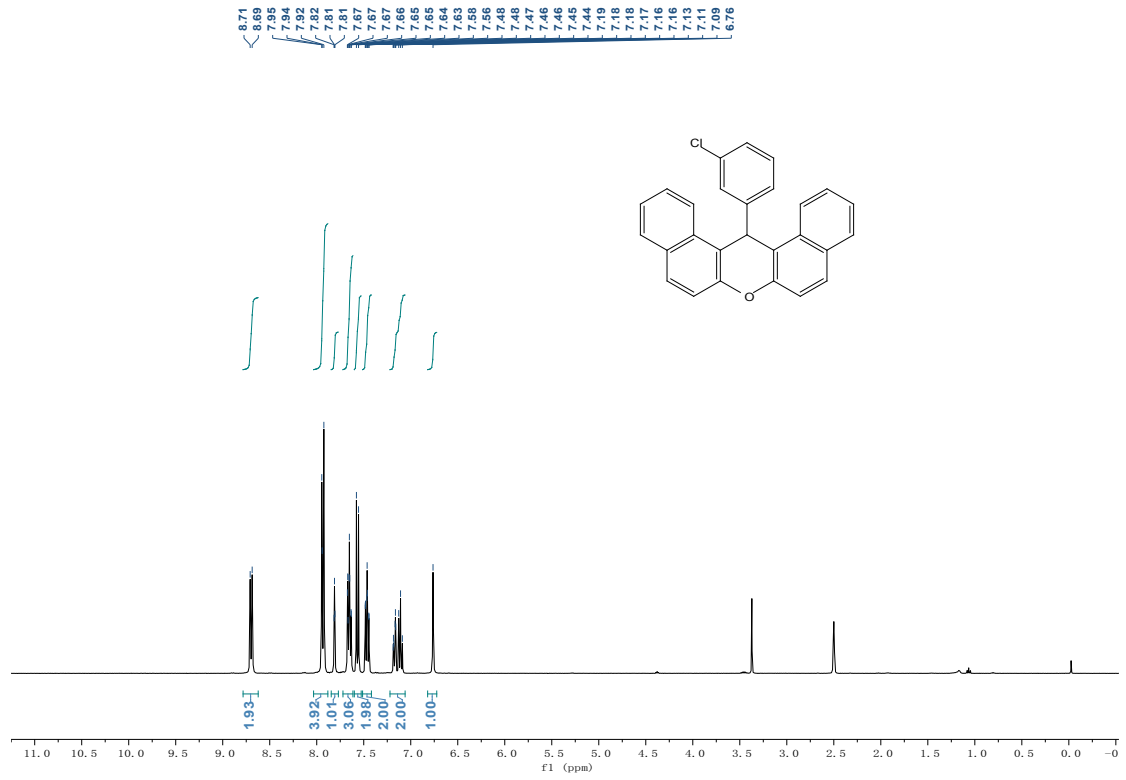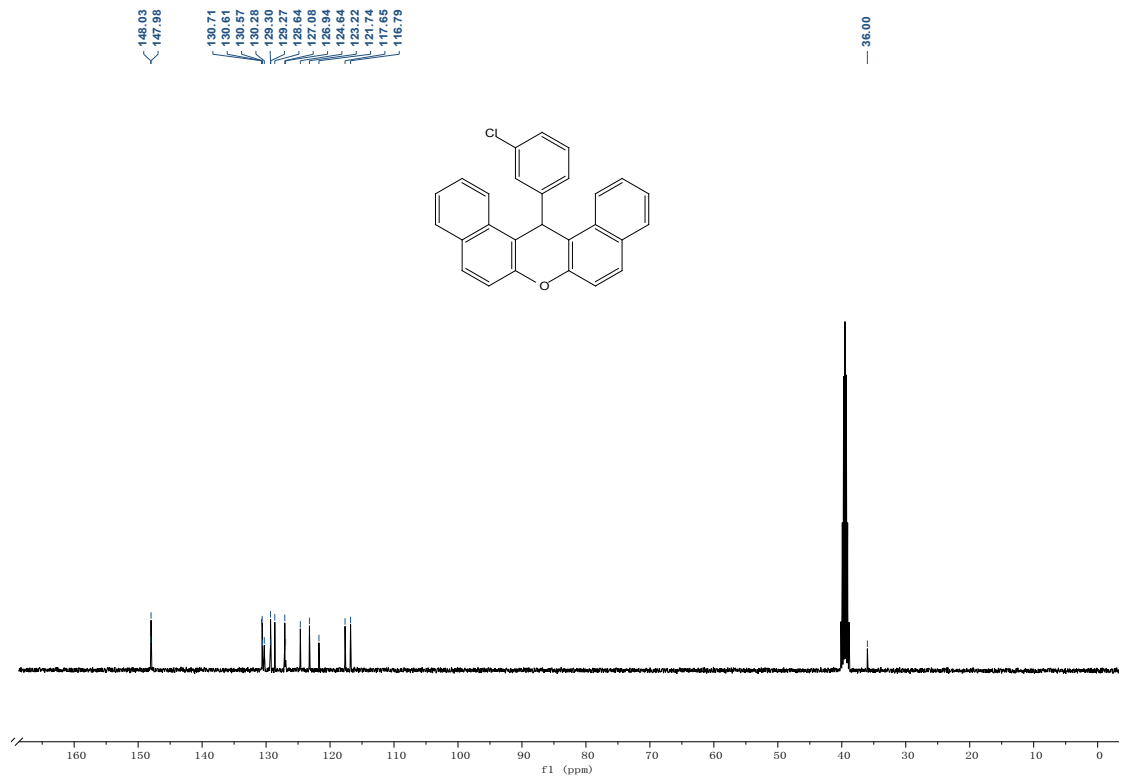

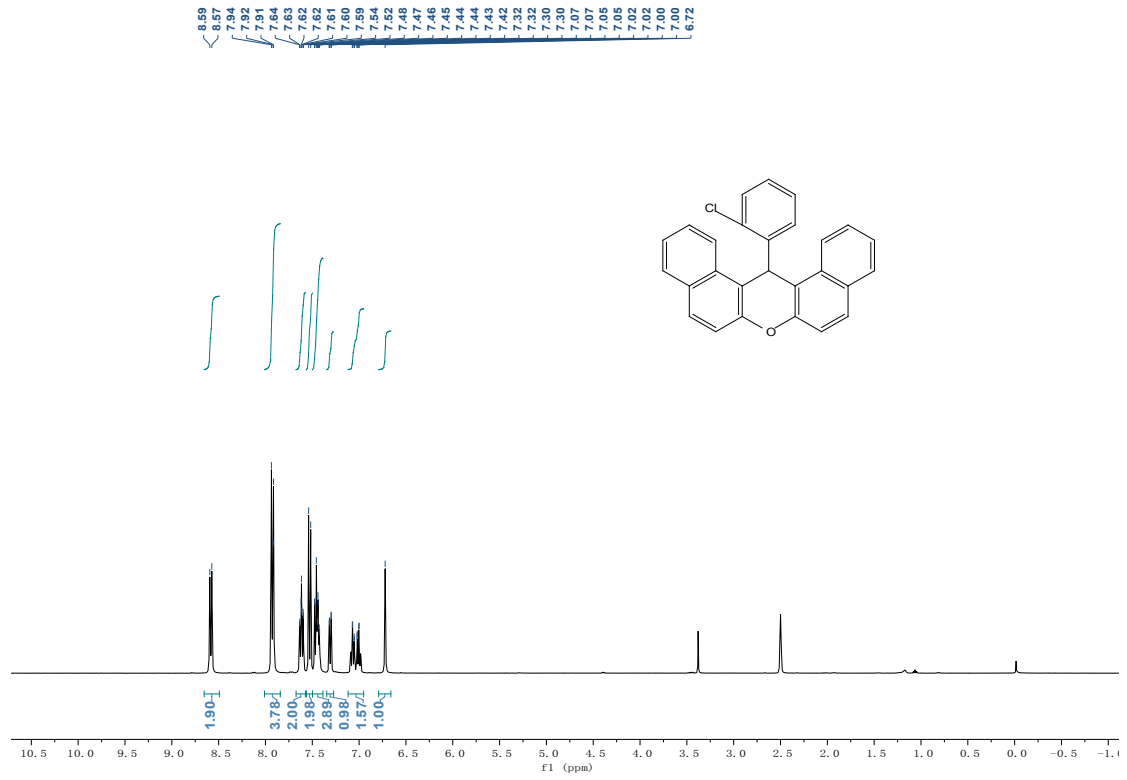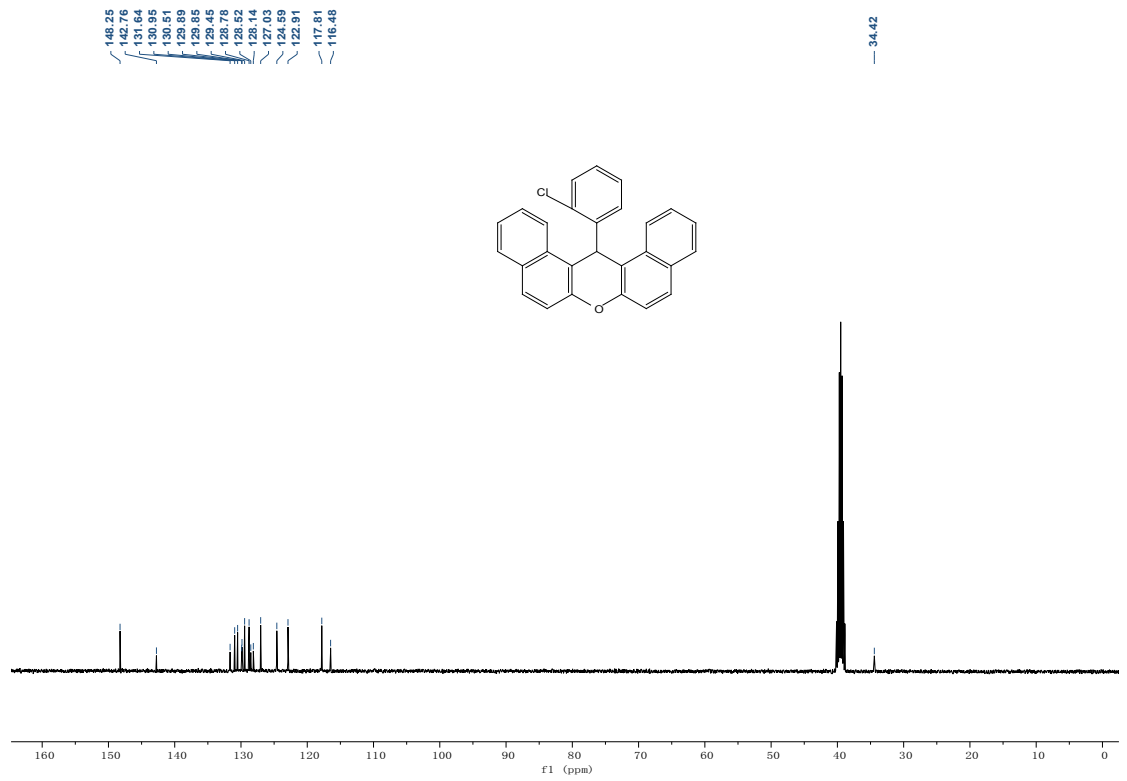

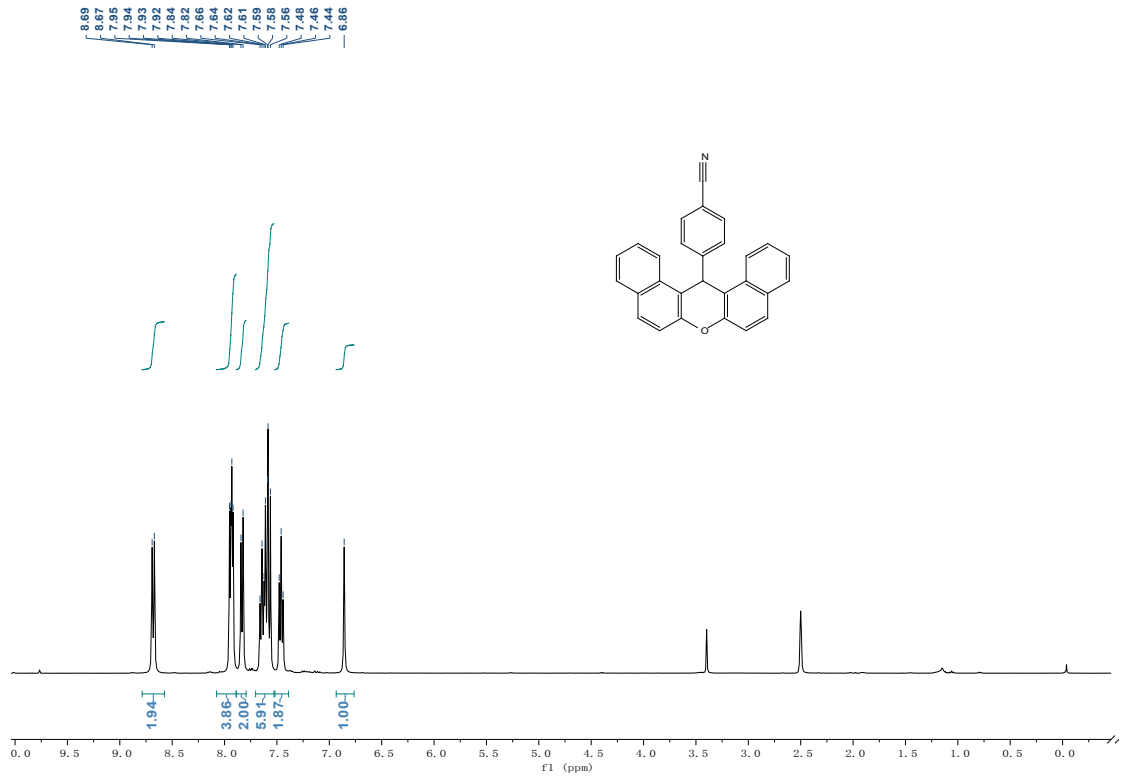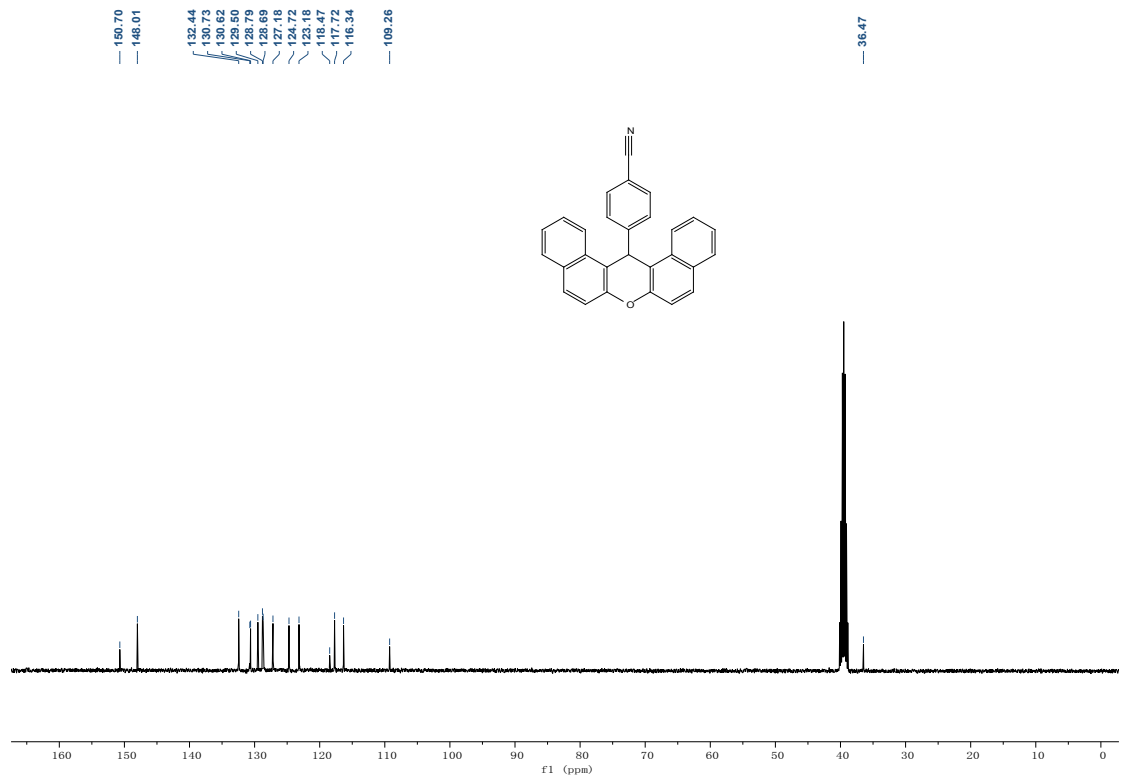

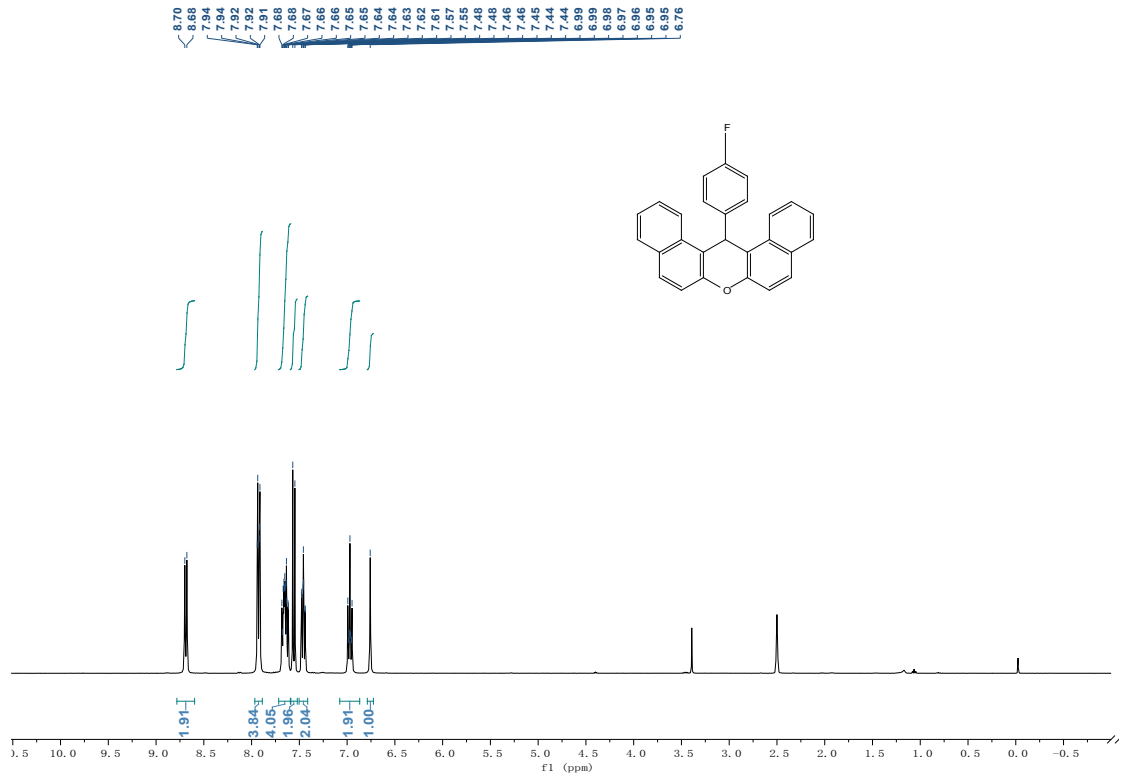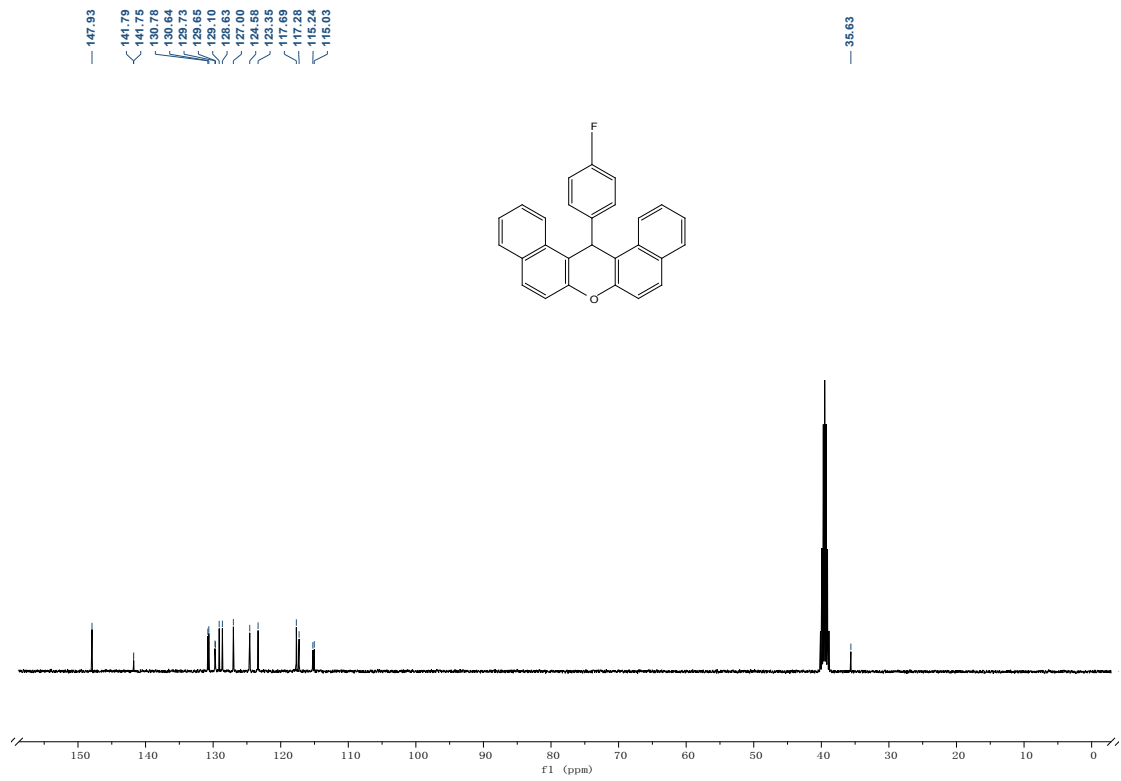

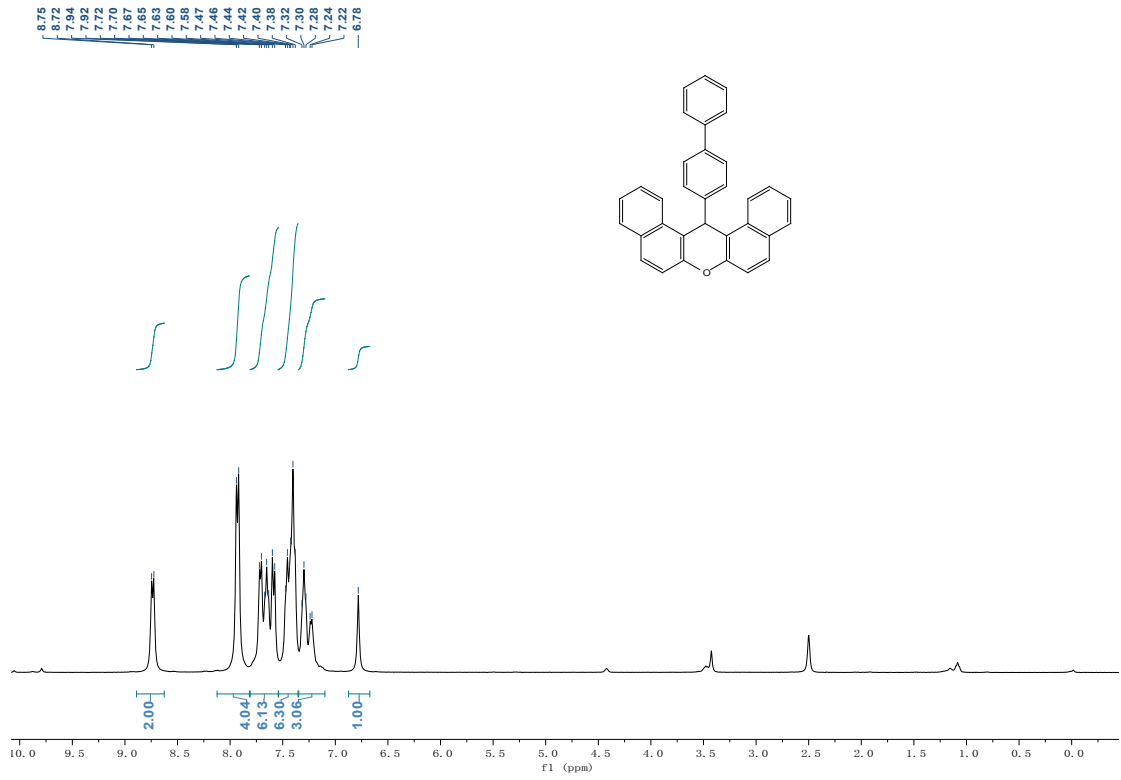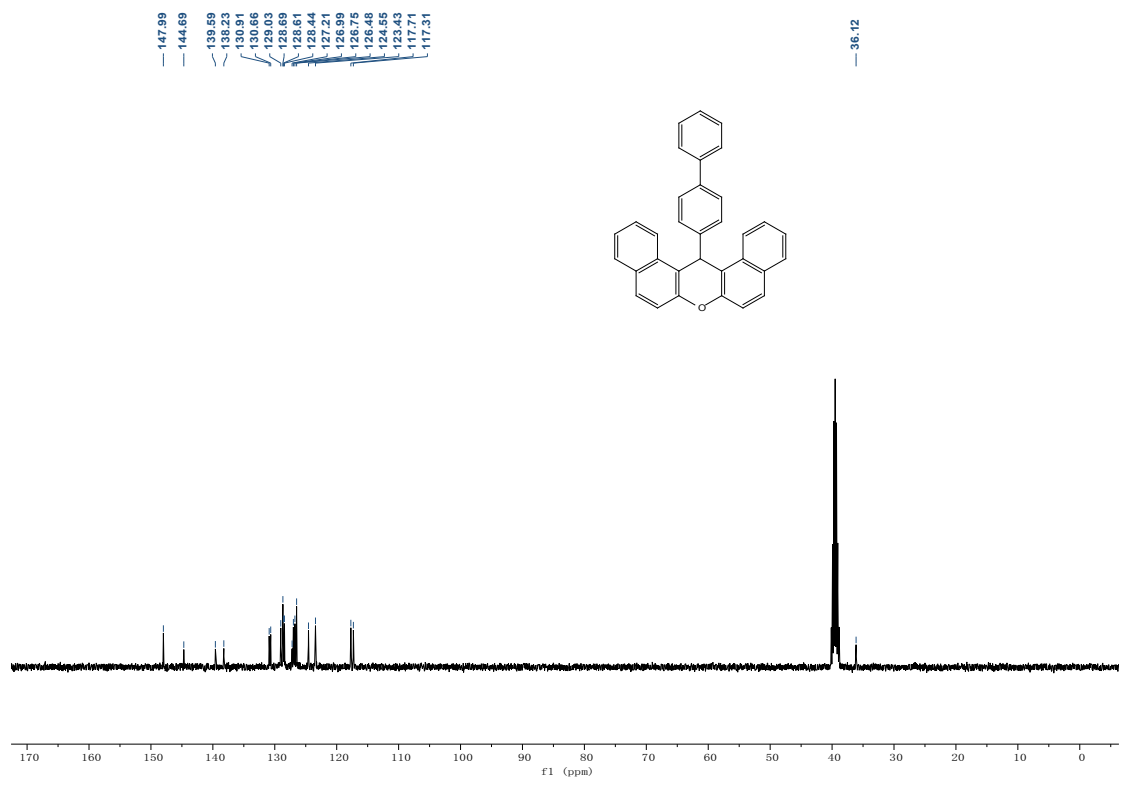



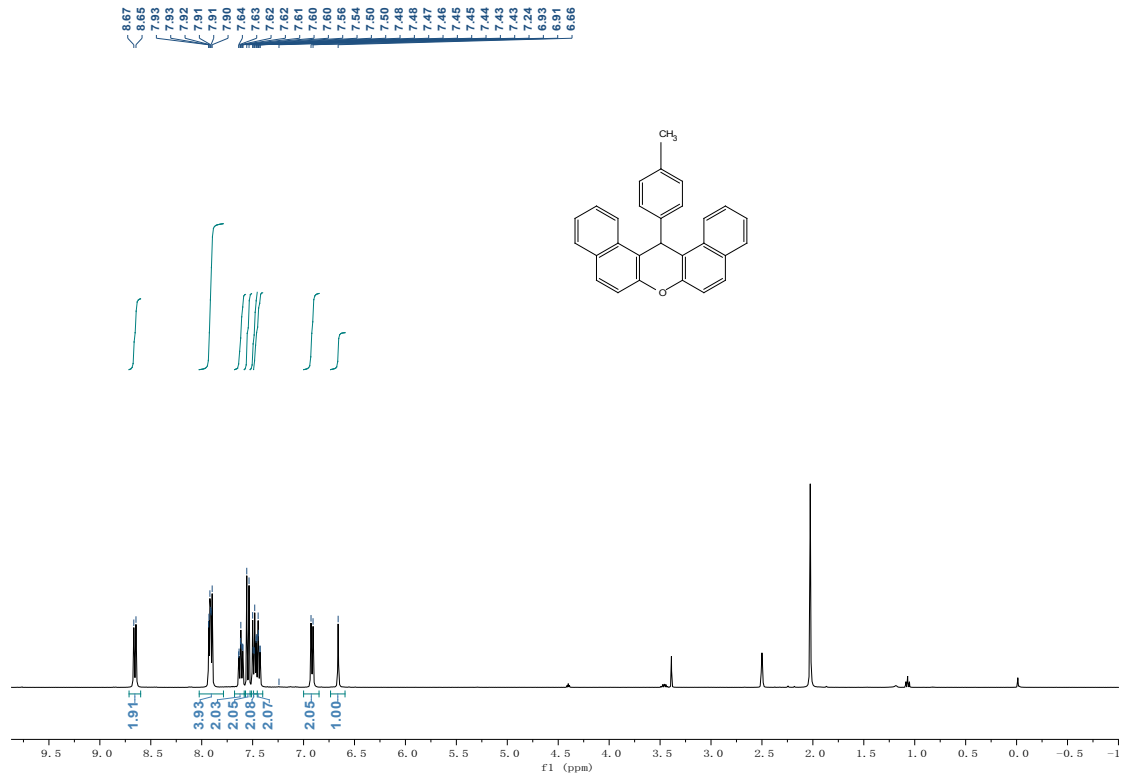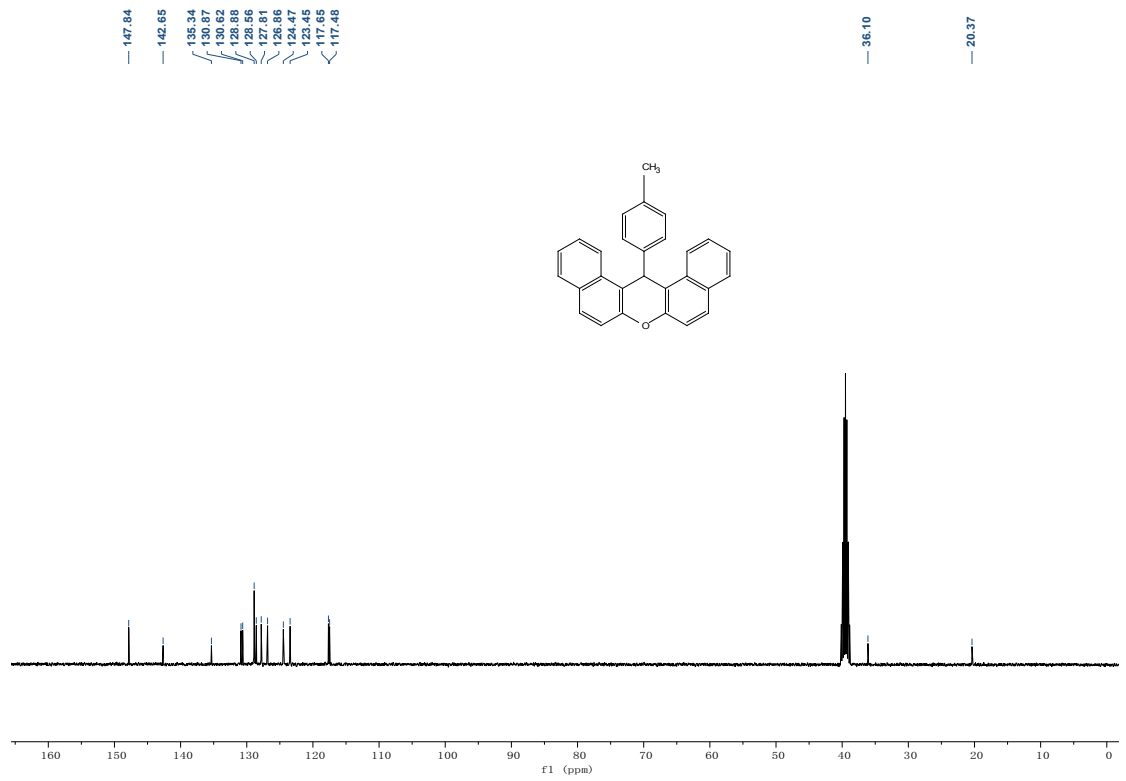

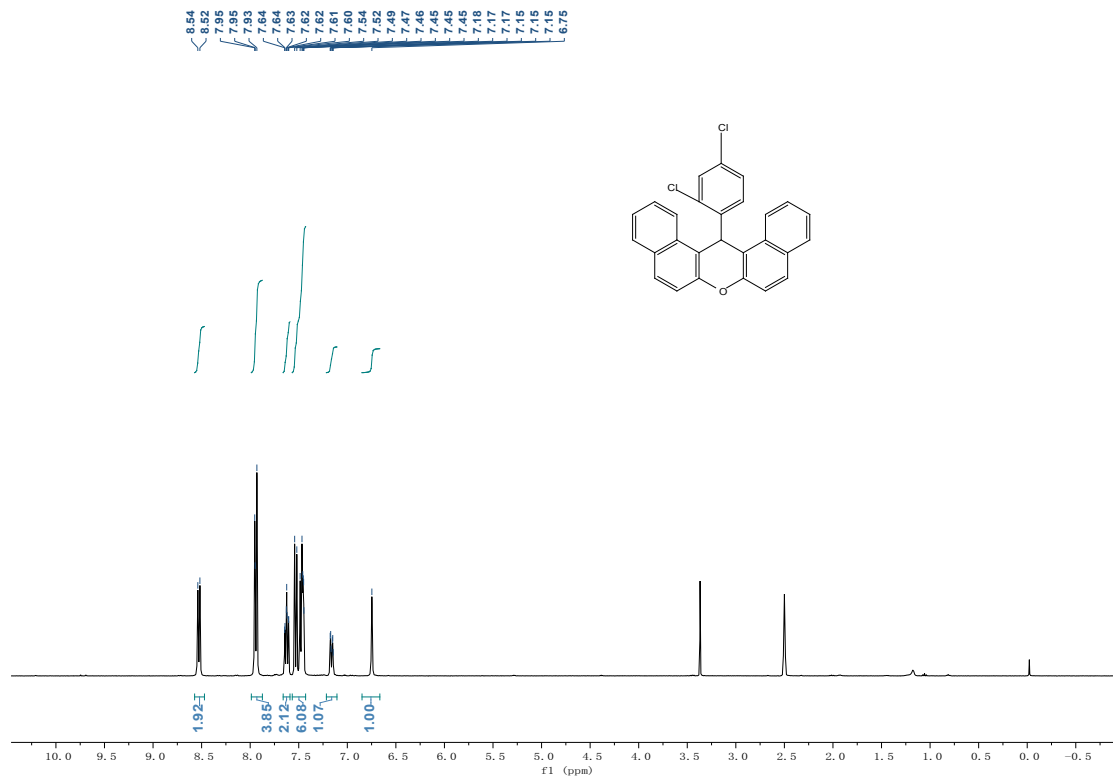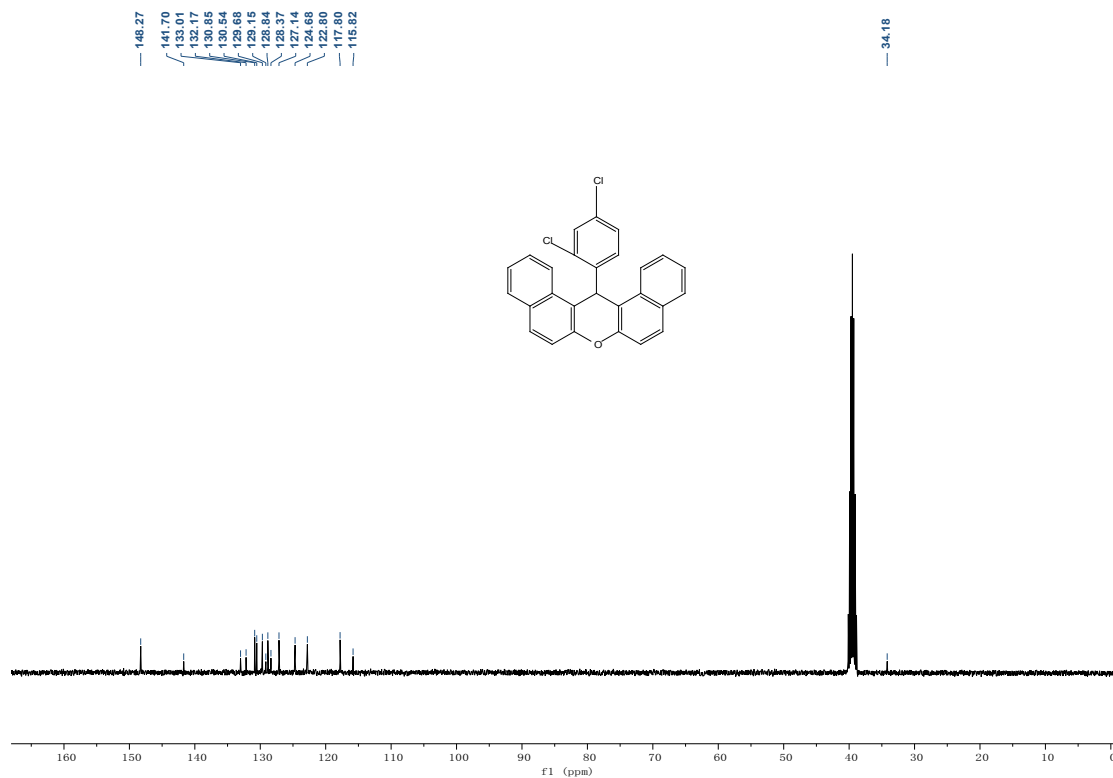

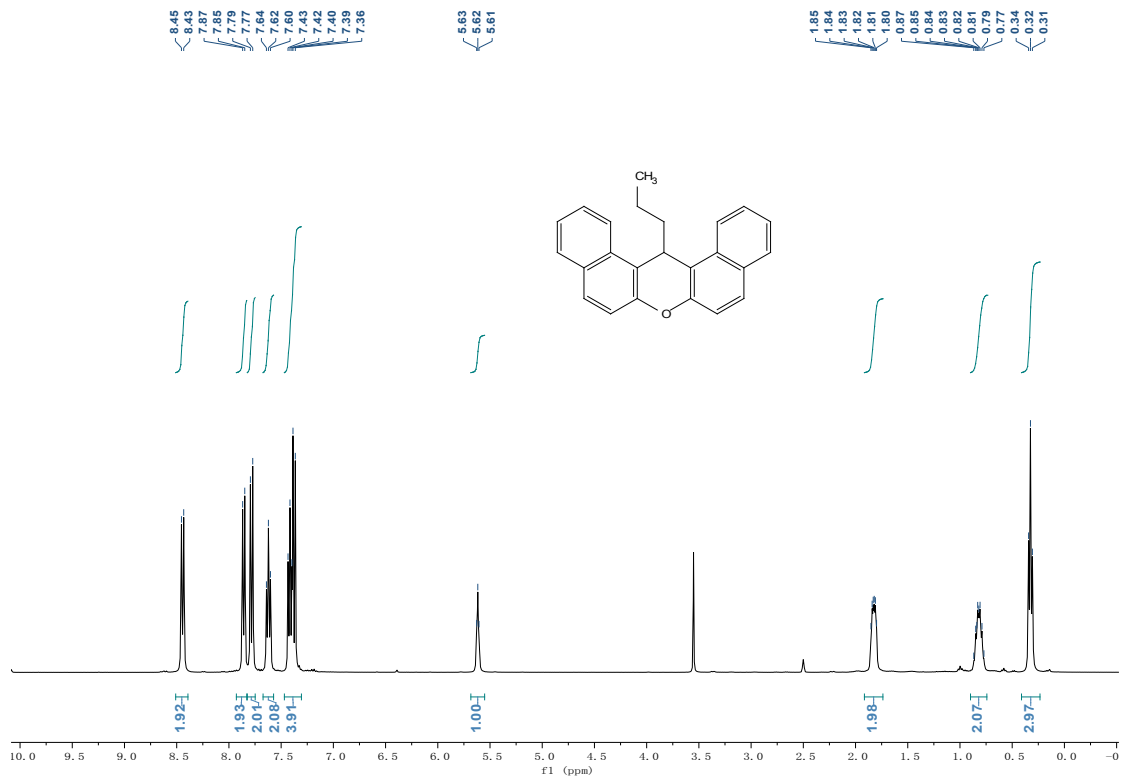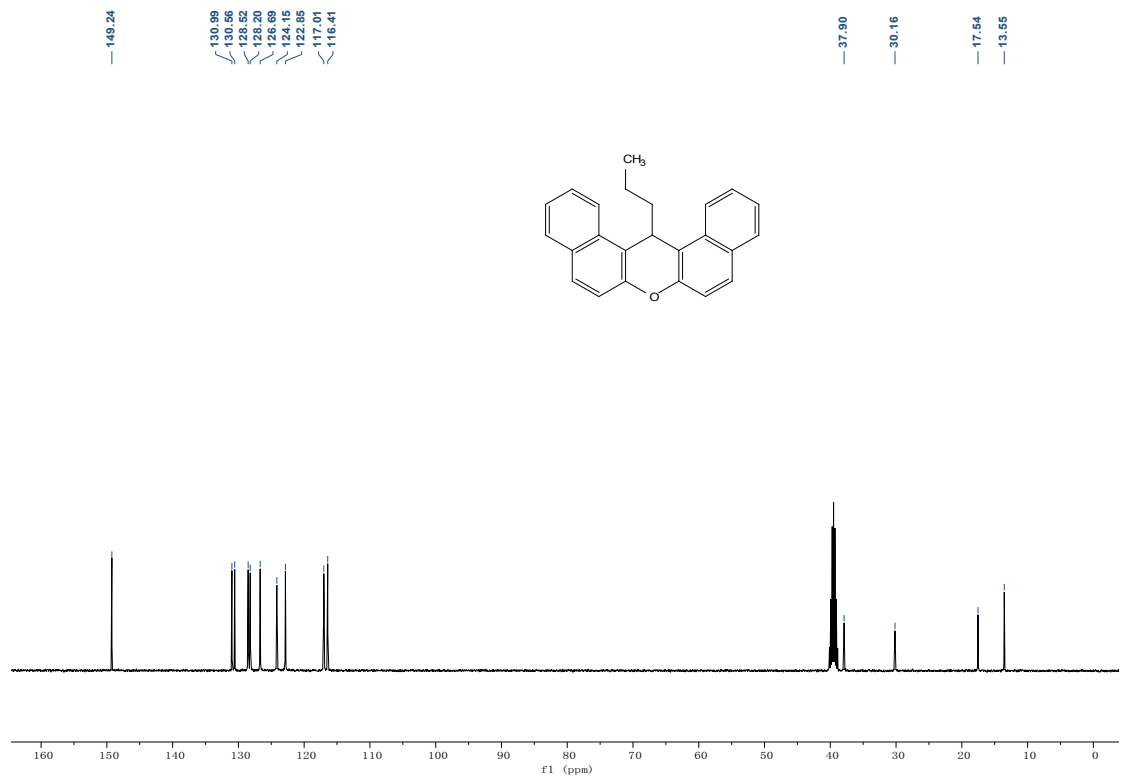

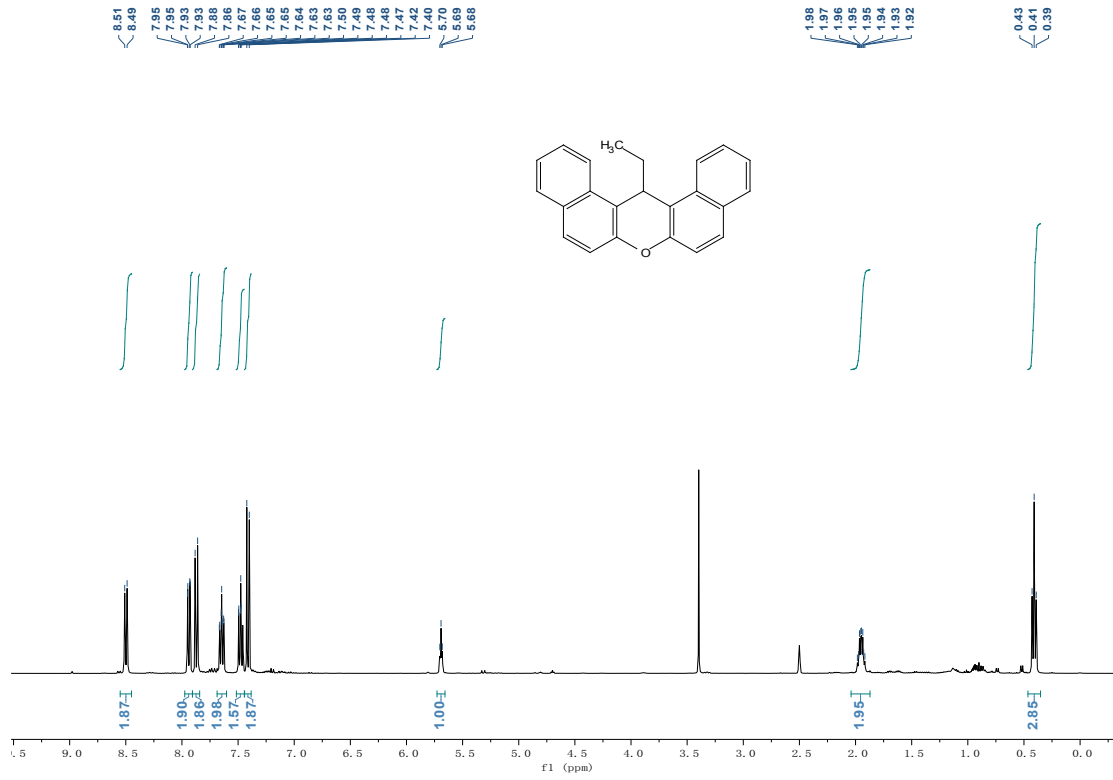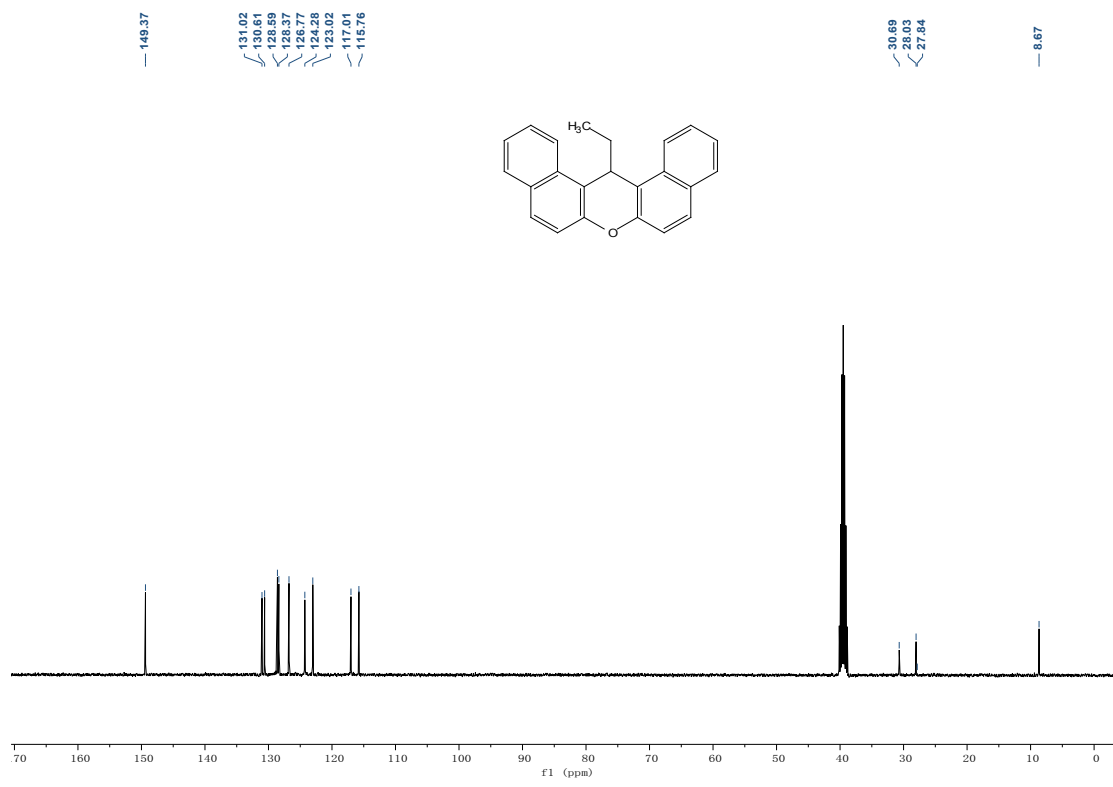

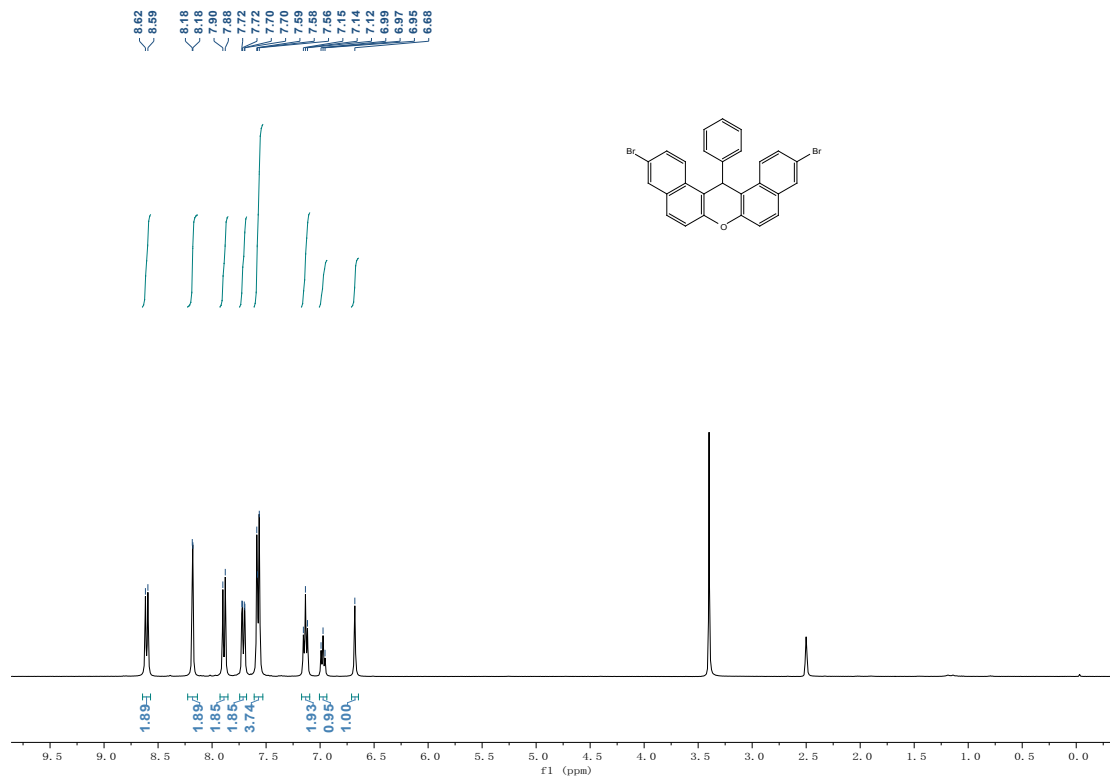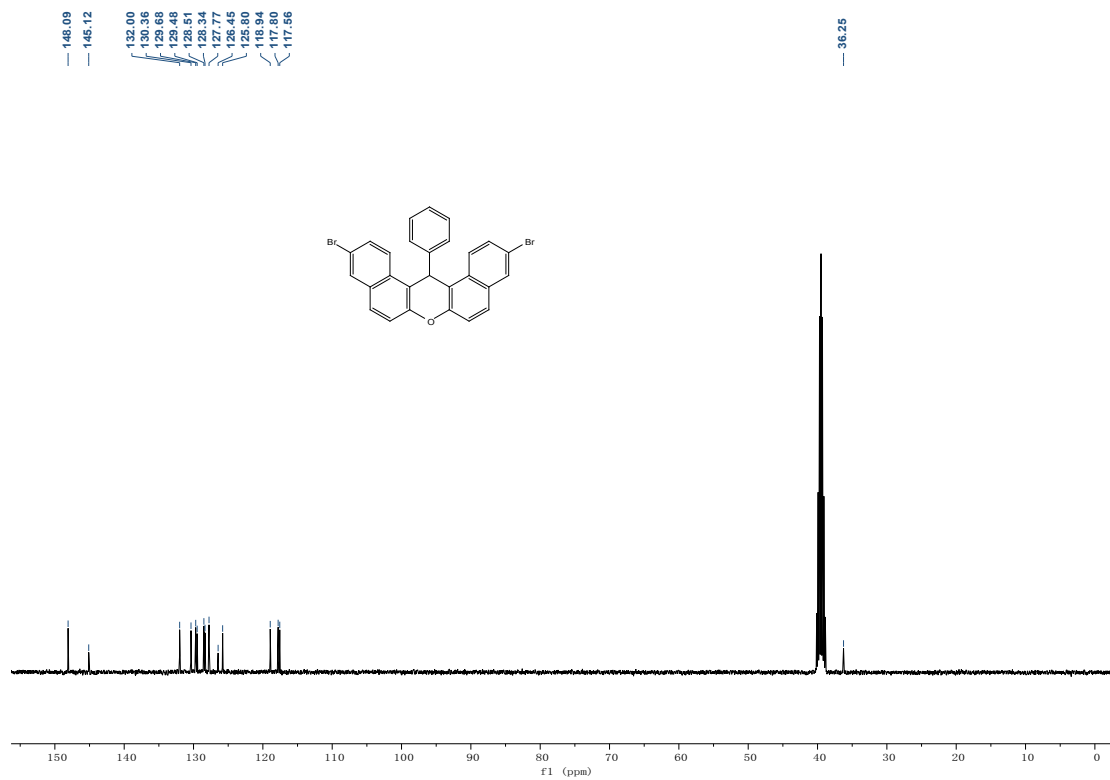

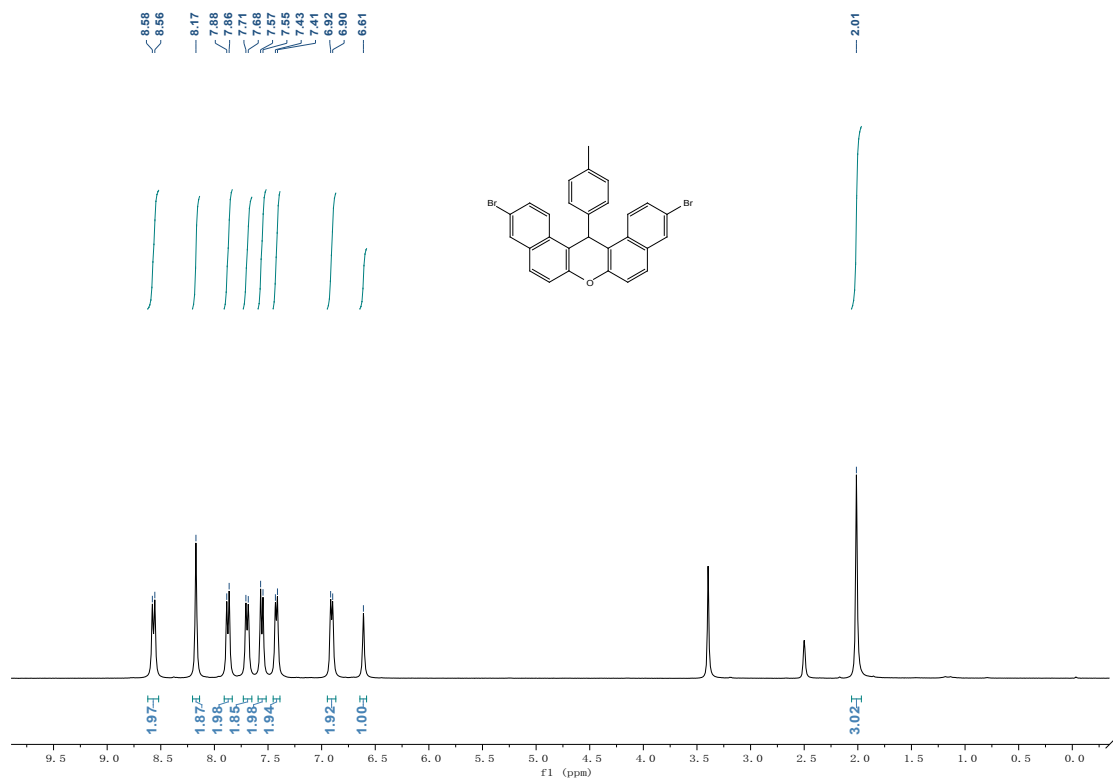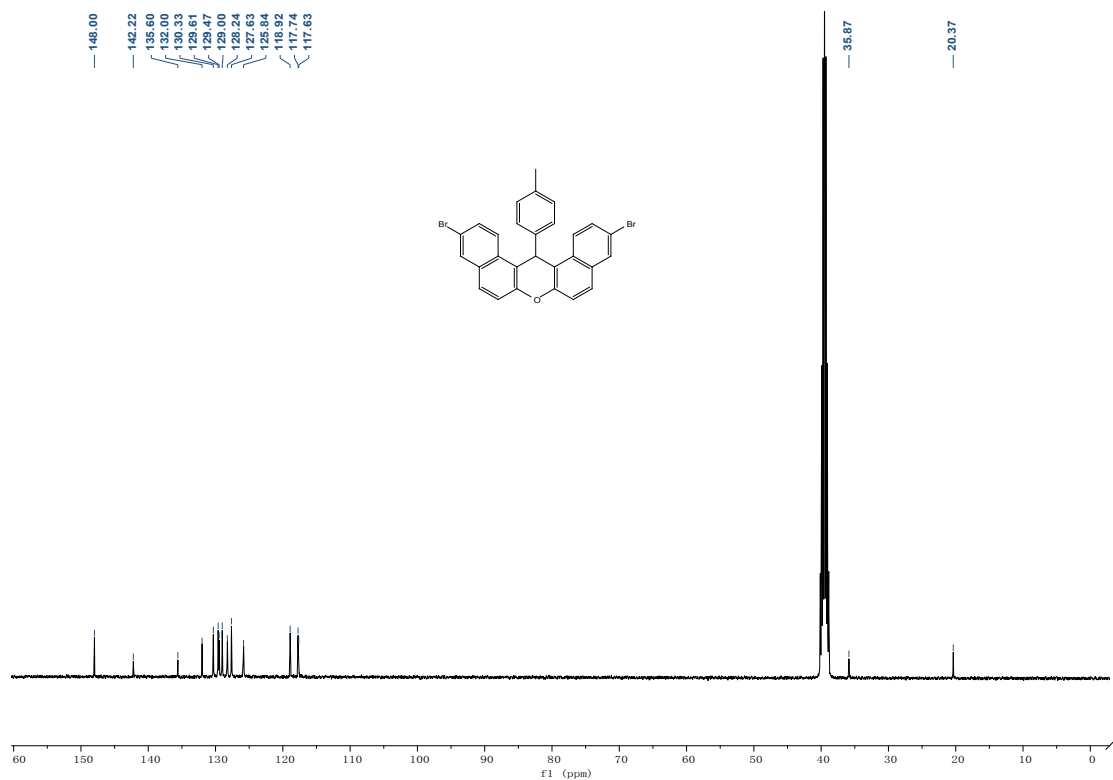

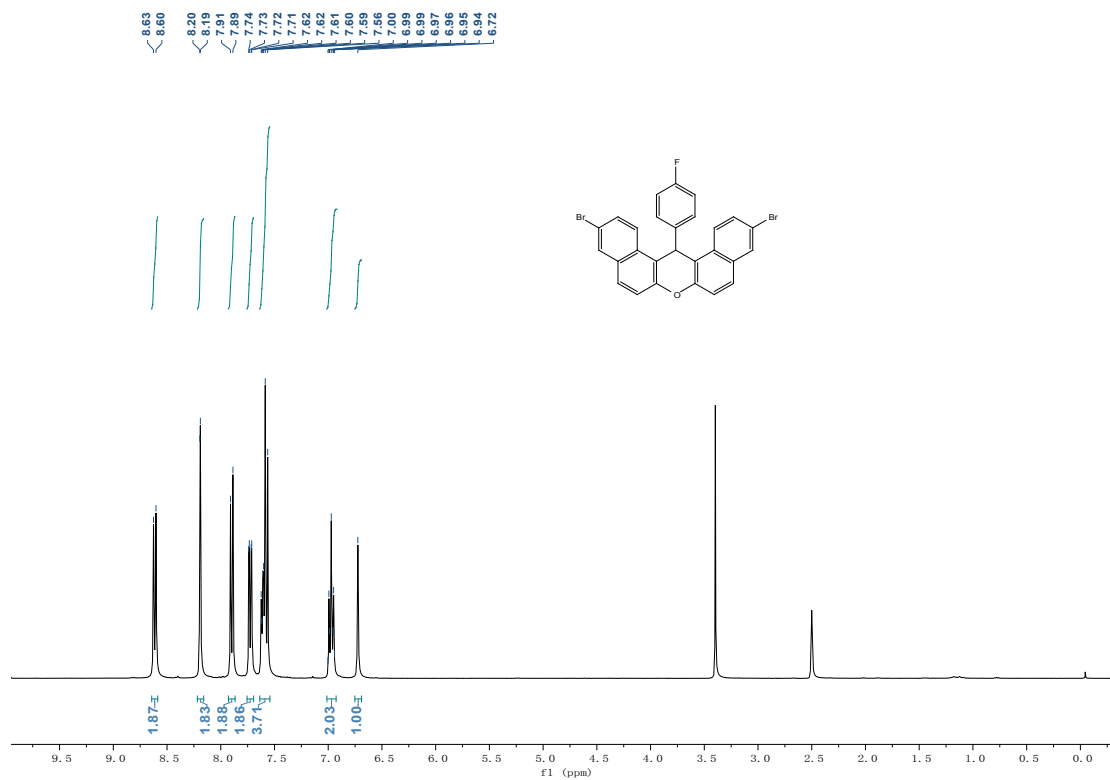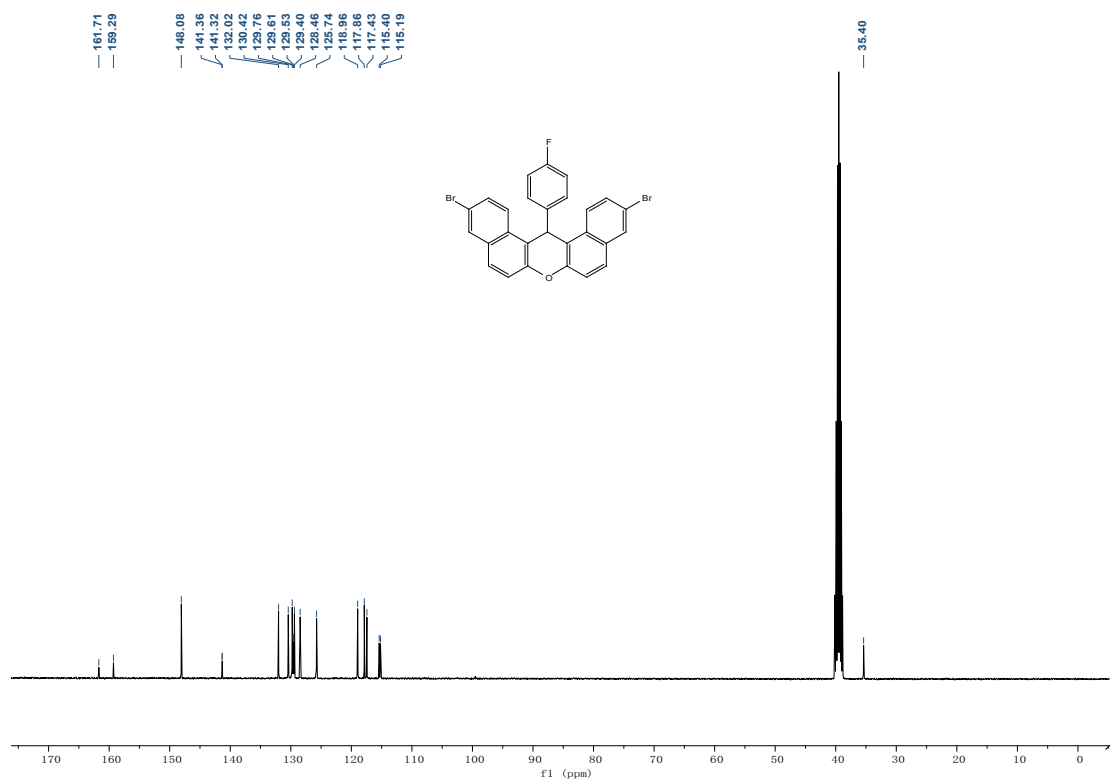

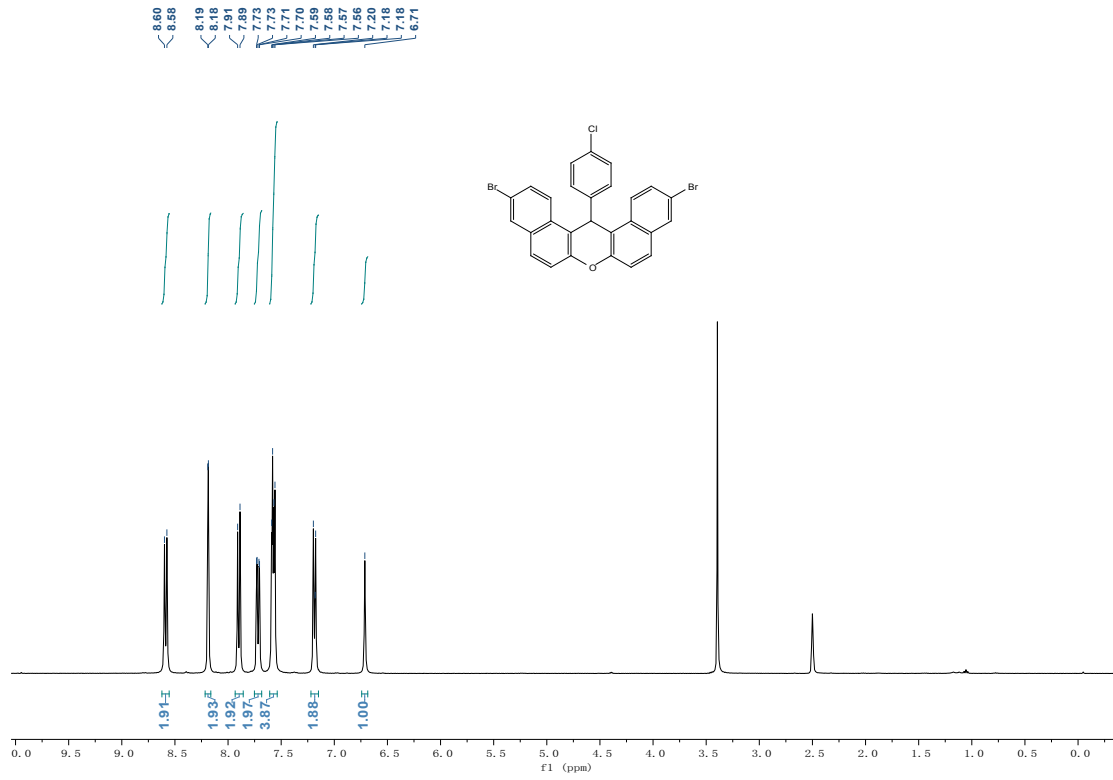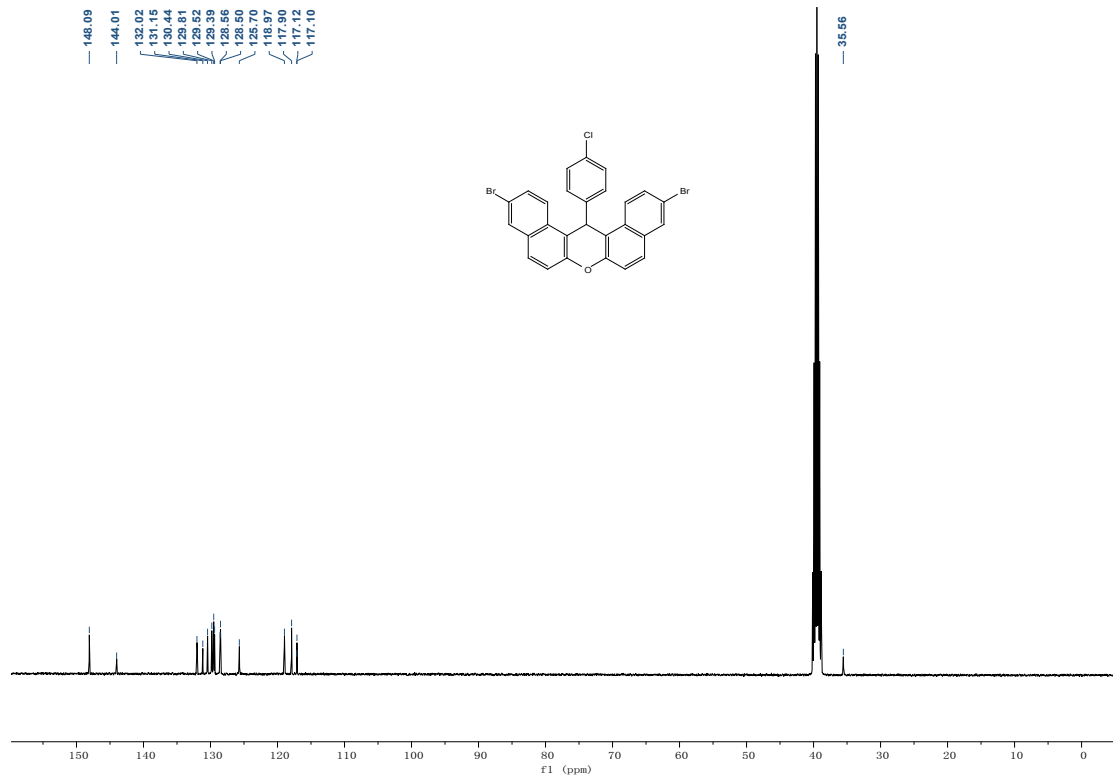



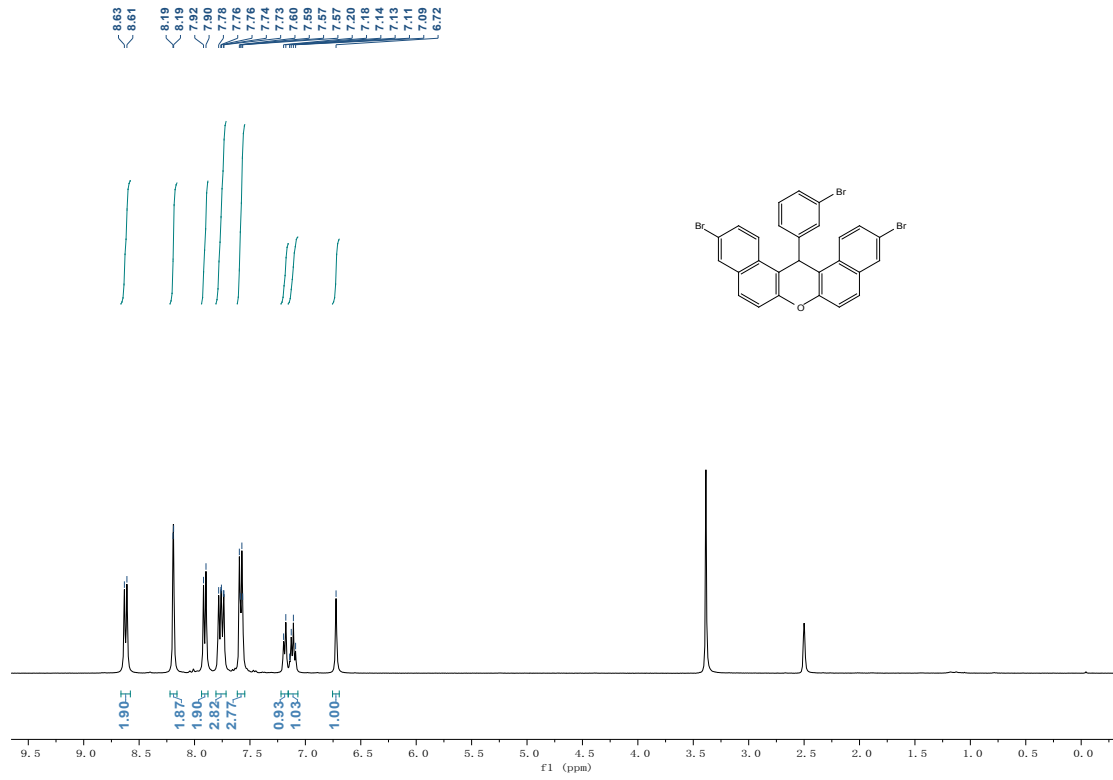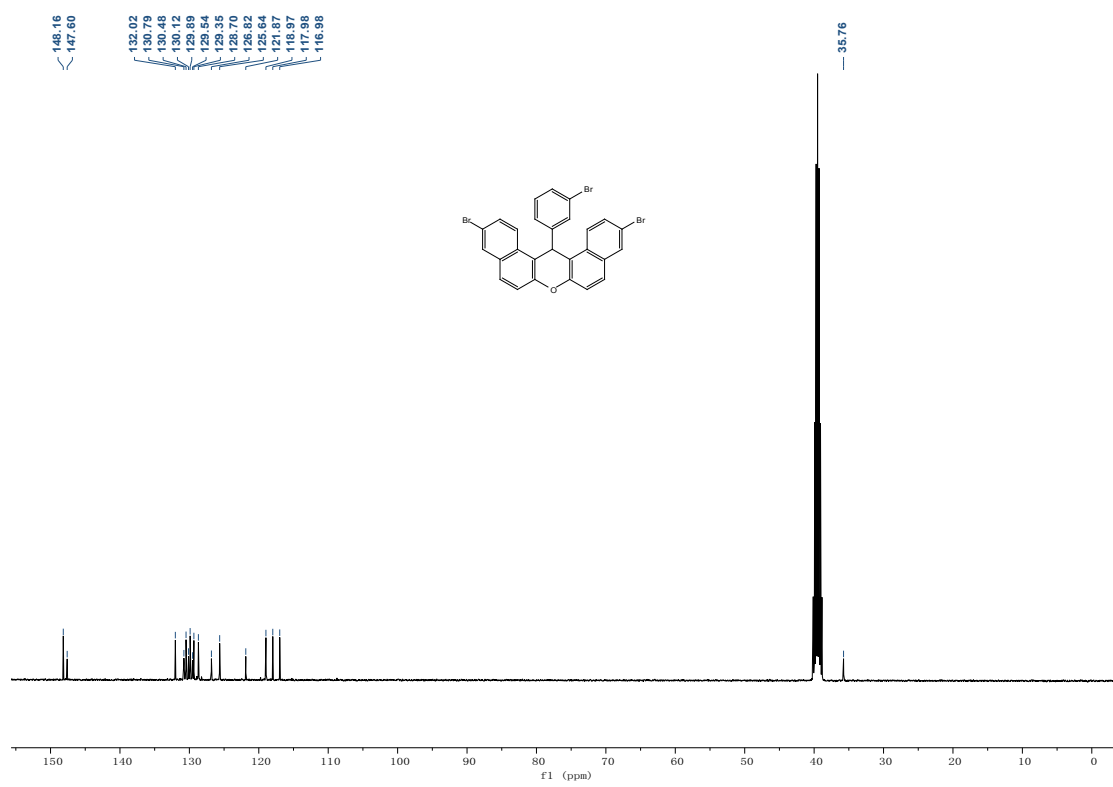

Supplement: RA-009-C9RA05748J-s001.pdf [file RA-009-C9RA05748J-s001.pdf]
